# Supplementary material
Source: publisher figshare collection journal article supplement (https://gsapubs.figshare.com/ndownloader/files/23296514)
Supplement: Supplementary file 1 [file 23296514]

Table DR1. Radiocarbon ages from reworked marine bivalves, western Greenland

| Shell ID                                                             | Amino Acid Lab Number | Radiocarbon Lab Number | Radiocarbon Age (14C yr BP) | Calibrated Age (cal yr BP $\pm 2\sigma$ ) | Asp D/L |
|----------------------------------------------------------------------|-----------------------|------------------------|-----------------------------|-------------------------------------------|---------|
| <i>Whale Bone Site, Melville Bugt (74° 43.841' N, 56° 54.756' W)</i> |                       |                        |                             |                                           |         |
| 11WBS-23                                                             | UAL 9272              | OS-99348               | 8460 $\pm$ 40               | 9100 $\pm$ 120                            | 0.228   |
| 11WBS-26                                                             | UAL 9275              | OS-99349               | 8590 $\pm$ 30               | 9250 $\pm$ 120                            | 0.214   |
| 11WBS-30                                                             | UAL 9279              | OS-99351               | 3810 $\pm$ 25               | 3760 $\pm$ 90                             | 0.188   |
| 11WBS-36                                                             | UAL 9285              | OS-99350               | 1300 $\pm$ 20               | 840 $\pm$ 70                              | 0.149   |
| 11WBS-37                                                             | UAL 9286              | OS-99403               | 1700 $\pm$ 25               | 1250 $\pm$ 60                             | 0.168   |
| <i>Previously published (Bennike, 2008)</i>                          |                       |                        |                             |                                           |         |
| -                                                                    | -                     | LuS-6443               | 8525 $\pm$ 50               | 9150 $\pm$ 150                            | ND      |
| <i>Upernavik Isfjord site 11GRO-1 (72° 49.537' N, 54° 31.983' W)</i> |                       |                        |                             |                                           |         |
| 11GRO-1-53                                                           | UAL 9166              | OS-99343               | 920 $\pm$ 25                | 540 $\pm$ 60                              | 0.152   |
| 11GRO-1-55                                                           | UAL 9168              | OS-99344               | 7180 $\pm$ 30               | 7640 $\pm$ 70                             | 0.231   |
| 11GRO-1-42                                                           | UAL 9155              | OS-99345               | 4060 $\pm$ 25               | 4090 $\pm$ 110                            | 0.194   |
| 11GRO-1-44                                                           | UAL 9157              | OS-99346               | 5000 $\pm$ 30               | 5360 $\pm$ 80                             | 0.212   |
| 11GRO-1-60                                                           | UAL 9173              | OS-99347               | 2070 $\pm$ 20               | 1630 $\pm$ 80                             | 0.167   |
| <i>Upernavik Isfjord site 11GRO-9 (72° 58.559' N, 72° 58.559' N)</i> |                       |                        |                             |                                           |         |
| 11GRO-9-7                                                            | UAL 8808              | OS-92693               | 3810 $\pm$ 30               | 3760 $\pm$ 100                            | 0.188   |
| 11GRO-9-10                                                           | UAL 8819              | OS-92694               | 2050 $\pm$ 25               | 1620 $\pm$ 80                             | 0.172   |
| 11GRO-9-12                                                           | UAL 8816              | OS-92695               | 915 $\pm$ 25                | 530 $\pm$ 60                              | 0.148   |
| 11GRO-9-13                                                           | UAL 8803              | OS-92696               | 3990 $\pm$ 25               | 3990 $\pm$ 100                            | 0.173   |
| 11GRO-9-48                                                           | UAL 8810              | OS-92697               | 4230 $\pm$ 25               | 4370 $\pm$ 40                             | 0.193   |
| 11GRO-9-54                                                           | UAL 8820              | OS-92698               | 4770 $\pm$ 25               | 5050 $\pm$ 140                            | 0.196   |
| <i>Jakobshavn Isfjord site (69° 7.500' N, 50° 3.525' W)</i>          |                       |                        |                             |                                           |         |
| 09GRO-Shells-3-10                                                    | UAL 7649 H            | UCIAMS-70131           | 3780 $\pm$ 15               | 3730 $\pm$ 80                             | 0.200   |
| 09GRO-Shells-3-12                                                    | UAL 7649 I            | UCIAMS-70132           | 4965 $\pm$ 15               | 5330 $\pm$ 70                             | 0.191   |
| 09GRO-Shells-3-17                                                    | UAL 7617 D            | UCIAMS-70133           | 4050 $\pm$ 15               | 4060 $\pm$ 80                             | ND      |
| 09GRO-Shells-3-24                                                    | UAL 7617 H            | UCIAMS-70134           | 4000 $\pm$ 15               | 4000 $\pm$ 80                             | 0.184   |
| 09GRO-Shells-3-40                                                    | UAL 7617 T            | UCIAMS-70135           | 4940 $\pm$ 20               | 5280 $\pm$ 50                             | 0.202   |
| 09GRO-Shells-3-44                                                    | UAL 7617 W            | UCIAMS-70136           | 5375 $\pm$ 15               | 5750 $\pm$ 90                             | ND      |
| <i>Previously published (Weidick and Bennike, 2007)</i>              |                       |                        |                             |                                           |         |
| -                                                                    | -                     | Ua-4581                | 3590 $\pm$ 65               | 3490 $\pm$ 160                            | ND      |
| -                                                                    | -                     | Ua-4582                | 3940 $\pm$ 65               | 3930 $\pm$ 190                            | ND      |
| -                                                                    | -                     | Ua-4580                | 3945 $\pm$ 70               | 3930 $\pm$ 200                            | ND      |
| -                                                                    | -                     | Ua-4583                | 4075 $\pm$ 70               | 4120 $\pm$ 210                            | ND      |
| -                                                                    | -                     | Ua-2350                | 4290 $\pm$ 100              | 4440 $\pm$ 320                            | ND      |
| -                                                                    | -                     | Ua-4579                | 5240 $\pm$ 75               | 5610 $\pm$ 180                            | ND      |
| -                                                                    | -                     | Ua-4578                | 5710 $\pm$ 55               | 6120 $\pm$ 140                            | ND      |

Table DR2. Amino acid data from reworked *Mya* bivalves from western Greenland

| Lab<br>Number<br>(UAL) | Shell<br>Number | Site    | Asp D/L | Model Age (Cal. yr B.P.) |                  |       |
|------------------------|-----------------|---------|---------|--------------------------|------------------|-------|
|                        |                 |         |         | 2.5%                     | Best<br>Estimate | 97.5% |
| 8803 D                 | 13              | 11GRO-9 | 0.1627  | 708                      | 1878             | 3669  |
| 8803 E                 | 13              | 11GRO-9 | 0.1733  | 1115                     | 2672             | 4874  |
| 8804 D                 | 21              | 11GRO-9 | 0.1766  | 1290                     | 2923             | 5198  |
| 8805 D                 | 45              | 11GRO-9 | 0.1679  | 893                      | 2277             | 4324  |
| 8806 D                 | 42              | 11GRO-9 | 0.1773  | 1319                     | 2990             | 5353  |
| 8807 D                 | 19              | 11GRO-9 | 0.1967  | 2547                     | 4838             | 7849  |
| 8809 D                 | 15              | 11GRO-9 | 0.1808  | 1503                     | 3287             | 5813  |
| 8811 D                 | 44              | 11GRO-9 | 0.1956  | 2500                     | 4725             | 7780  |
| 8812 D                 | 22              | 11GRO-9 | 0.1883  | 1938                     | 3964             | 6653  |
| 8813 D                 | 58              | 11GRO-9 | 0.1863  | 1789                     | 3762             | 6363  |
| 8814 D                 | 16              | 11GRO-9 | 0.1760  | 1264                     | 2879             | 5160  |
| 8815 D                 | 57              | 11GRO-9 | 0.1862  | 1814                     | 3780             | 6479  |
| 8817 D                 | 18              | 11GRO-9 | 0.1871  | 1895                     | 3873             | 6598  |
| 8818 D                 | 46              | 11GRO-9 | 0.1787  | 1355                     | 3078             | 5479  |
| 8821 D                 | 59              | 11GRO-9 | 0.1879  | 1892                     | 3936             | 6620  |
| 8822 D                 | 32              | 11GRO-9 | 0.1941  | 2344                     | 4544             | 7483  |
| 9069 B                 | 37              | 11GRO-9 | 0.1976  | 2600                     | 4928             | 7968  |
| 9070 B                 | 11              | 11GRO-9 | 0.2055  | 3279                     | 5897             | 9461  |
| 9071 B                 | 53              | 11GRO-9 | 0.1924  | 2256                     | 4402             | 7408  |
| 9072 B                 | 9               | 11GRO-9 | 0.1820  | 1573                     | 3392             | 5917  |
| 9073 B                 | 52              | 11GRO-9 | 0.1686  | 926                      | 2297             | 4306  |
| 9074 B                 | 63              | 11GRO-9 | 0.1914  | 2199                     | 4285             | 7223  |
| 9075 B                 | 33              | 11GRO-9 | 0.1619  | 656                      | 1850             | 3663  |
| 9076 B                 | 40              | 11GRO-9 | 0.2104  | 3750                     | 6503             | 10424 |
| 9077 B                 | 20              | 11GRO-9 | 0.1930  | 2256                     | 4437             | 7230  |
| 9078 B                 | 1               | 11GRO-9 | 0.1917  | 2161                     | 4310             | 7123  |
| 9079 B                 | 3               | 11GRO-9 | 0.1859  | 1792                     | 3750             | 6528  |
| 9080 B                 | 6               | 11GRO-9 | 0.2338  | 5861                     | 10270            | 17426 |
| 9081 B                 | 35              | 11GRO-9 | 0.2043  | 3163                     | 5717             | 9036  |
| 9082 B                 | 61              | 11GRO-9 | 0.2124  | 3905                     | 6781             | 10651 |
| 9083 B                 | 38              | 11GRO-9 | 0.1748  | 1160                     | 2772             | 5020  |
| 9084 B                 | 23              | 11GRO-9 | 0.1605  | 605                      | 1749             | 3475  |
| 9085 B                 | 55              | 11GRO-9 | 0.1956  | 2483                     | 4727             | 7751  |
| 9086 B                 | 8               | 11GRO-9 | 0.1940  | 2350                     | 4576             | 7575  |
| 9087 B                 | 26              | 11GRO-9 | 0.1918  | 2143                     | 4322             | 7216  |
| 9088 B                 | 25              | 11GRO-9 | 0.1892  | 1992                     | 4066             | 6817  |
| 9089 B                 | 24              | 11GRO-9 | 0.1878  | 1875                     | 3910             | 6613  |
| 9090 B                 | 17              | 11GRO-9 | 0.1951  | 2387                     | 4647             | 7622  |
| 9091 B                 | 65              | 11GRO-9 | 0.2071  | 3433                     | 6071             | 9671  |
| 9092 B                 | 4               | 11GRO-9 | 0.1560  | 511                      | 1465             | 3014  |
| 9093 B                 | 56              | 11GRO-9 | 0.1959  | 2491                     | 4744             | 7774  |
| 9094 B                 | 47              | 11GRO-9 | 0.1792  | 1433                     | 3157             | 5636  |
| 9095 B                 | 2               | 11GRO-9 | 0.1970  | 2547                     | 4888             | 7972  |
| 9096 B                 | 27              | 11GRO-9 | 0.1794  | 1399                     | 3160             | 5696  |
| 9097 B                 | 5               | 11GRO-9 | 0.1786  | 1385                     | 3107             | 5430  |
| 9098 B                 | 62              | 11GRO-9 | 0.1726  | 1125                     | 2622             | 4856  |
| 9099 B                 | 14              | 11GRO-9 | 0.1927  | 2261                     | 4416             | 7342  |
| 9100 B                 | 49              | 11GRO-9 | 0.1952  | 2430                     | 4666             | 7659  |
| 9101 B                 | 28              | 11GRO-9 | 0.1781  | 1360                     | 3049             | 5498  |
| 9102 B                 | 30              | 11GRO-9 | 0.1791  | 1418                     | 3165             | 5662  |
| 9103 B                 | 34              | 11GRO-9 | 0.1635  | 736                      | 1965             | 3821  |
| 9104 B                 | 39              | 11GRO-9 | 0.1996  | 2774                     | 5172             | 8327  |
| 9105 B                 | 36              | 11GRO-9 | 0.1884  | 1935                     | 3962             | 6719  |
| 9106 B                 | 50              | 11GRO-9 | 0.1766  | 1261                     | 2936             | 5238  |
| 9107 B                 | 64              | 11GRO-9 | 0.1860  | 1798                     | 3756             | 6419  |
| 9108 B                 | 41              | 11GRO-9 | 0.1459  | 163                      | 858              | 2166  |
| 9109 B                 | 29              | 11GRO-9 | 0.1904  | 2093                     | 4184             | 6969  |
| 9110 B                 | 43              | 11GRO-9 | 0.2011  | 2931                     | 5346             | 8533  |
| 9111 B                 | 31              | 11GRO-9 | 0.1996  | 2757                     | 5134             | 8262  |
| 9112 B                 | 43              | 11GRO-9 | 0.1926  | 2240                     | 4381             | 7194  |

|        |    |         |        |      |      |       |
|--------|----|---------|--------|------|------|-------|
| 9113 B | 60 | 11GRO-9 | 0.1892 | 2013 | 4047 | 6812  |
| 9114 B | 1  | 11GRO-1 | 0.1899 | 2062 | 4135 | 6860  |
| 9115 B | 2  | 11GRO-1 | 0.2006 | 2891 | 5293 | 8436  |
| 9116 B | 3  | 11GRO-1 | 0.1763 | 1268 | 2907 | 5318  |
| 9117 B | 4  | 11GRO-1 | 0.1720 | 1032 | 2564 | 4762  |
| 9118 B | 5  | 11GRO-1 | 0.1687 | 938  | 2324 | 4375  |
| 9119 B | 6  | 11GRO-1 | 0.2032 | 3077 | 5613 | 8908  |
| 9120 B | 7  | 11GRO-1 | 0.1665 | 842  | 2156 | 4147  |
| 9121 B | 8  | 11GRO-1 | 0.1878 | 1891 | 3938 | 6609  |
| 9122 B | 9  | 11GRO-1 | 0.1867 | 1882 | 3859 | 6632  |
| 9123 B | 10 | 11GRO-1 | 0.1953 | 2432 | 4661 | 7615  |
| 9124 B | 11 | 11GRO-1 | 0.1707 | 975  | 2464 | 4557  |
| 9125 B | 12 | 11GRO-1 | 0.1666 | 820  | 2159 | 4167  |
| 9126 B | 13 | 11GRO-1 | 0.1987 | 2611 | 5041 | 8167  |
| 9127 B | 14 | 11GRO-1 | 0.1793 | 1380 | 3149 | 5530  |
| 9128 B | 15 | 11GRO-1 | 0.1954 | 2417 | 4675 | 7619  |
| 9129 B | 16 | 11GRO-1 | 0.1598 | 599  | 1681 | 3368  |
| 9130 B | 17 | 11GRO-1 | 0.1952 | 2393 | 4669 | 7657  |
| 9131 B | 18 | 11GRO-1 | 0.1858 | 1818 | 3727 | 6429  |
| 9132 B | 19 | 11GRO-1 | 0.1897 | 2001 | 4091 | 6803  |
| 9133 B | 20 | 11GRO-1 | 0.1983 | 2691 | 4998 | 8020  |
| 9134 B | 21 | 11GRO-1 | 0.1818 | 1504 | 3350 | 5838  |
| 9135 B | 22 | 11GRO-1 | 0.1890 | 1949 | 4041 | 6904  |
| 9136 B | 23 | 11GRO-1 | 0.1960 | 2488 | 4749 | 7722  |
| 9137 B | 24 | 11GRO-1 | 0.1762 | 1264 | 2895 | 5249  |
| 9138 B | 25 | 11GRO-1 | 0.1980 | 2646 | 4988 | 8080  |
| 9139 B | 26 | 11GRO-1 | 0.1787 | 1374 | 3101 | 5413  |
| 9140 B | 27 | 11GRO-1 | 0.1871 | 1874 | 3850 | 6572  |
| 9141 B | 28 | 11GRO-1 | 0.1991 | 2750 | 5102 | 8178  |
| 9142 B | 29 | 11GRO-1 | 0.1630 | 695  | 1900 | 3745  |
| 9143 B | 30 | 11GRO-1 | 0.2126 | 3962 | 6757 | 10635 |
| 9144 B | 31 | 11GRO-1 | 0.1757 | 1210 | 2858 | 5157  |
| 9145 B | 32 | 11GRO-1 | 0.1915 | 2199 | 4294 | 7153  |
| 9146 B | 33 | 11GRO-1 | 0.2061 | 3400 | 5915 | 9336  |
| 9147 B | 34 | 11GRO-1 | 0.1899 | 2063 | 4115 | 6821  |
| 9148 B | 35 | 11GRO-1 | 0.1883 | 1968 | 4002 | 6749  |
| 9149 B | 36 | 11GRO-1 | 0.1954 | 2470 | 4733 | 7635  |
| 9150 B | 37 | 11GRO-1 | 0.2093 | 3616 | 6359 | 10068 |
| 9151 B | 38 | 11GRO-1 | 0.1776 | 1306 | 3009 | 5435  |
| 9152 B | 39 | 11GRO-1 | 0.2109 | 3796 | 6561 | 10318 |
| 9153 B | 40 | 11GRO-1 | 0.1879 | 1946 | 3942 | 6692  |
| 9154 B | 41 | 11GRO-1 | 0.1656 | 789  | 2114 | 4040  |
| 9156 B | 43 | 11GRO-1 | 0.1935 | 2293 | 4519 | 7391  |
| 9158 B | 45 | 11GRO-1 | 0.1971 | 2590 | 4887 | 7846  |
| 9159 B | 46 | 11GRO-1 | 0.1761 | 1238 | 2901 | 5269  |
| 9160 B | 47 | 11GRO-1 | 0.1982 | 2613 | 5009 | 8141  |
| 9161 B | 48 | 11GRO-1 | 0.1760 | 1242 | 2911 | 5273  |
| 9162 B | 49 | 11GRO-1 | 0.2000 | 2785 | 5204 | 8274  |
| 9163 B | 50 | 11GRO-1 | 0.1708 | 1020 | 2462 | 4592  |
| 9164 B | 51 | 11GRO-1 | 0.1695 | 942  | 2385 | 4422  |
| 9165 B | 52 | 11GRO-1 | 0.1841 | 1670 | 3565 | 6219  |
| 9167 B | 54 | 11GRO-1 | 0.2037 | 3088 | 5634 | 9138  |
| 9169 B | 56 | 11GRO-1 | 0.2000 | 2829 | 5223 | 8453  |
| 9170 B | 57 | 11GRO-1 | 0.1945 | 2412 | 4626 | 7686  |
| 9171 B | 58 | 11GRO-1 | 0.1591 | 561  | 1654 | 3327  |
| 9172 B | 59 | 11GRO-1 | 0.1967 | 2500 | 4814 | 7841  |
| 9174 B | 61 | 11GRO-1 | 0.1824 | 1573 | 3439 | 6018  |
| 9175 B | 62 | 11GRO-1 | 0.1853 | 1765 | 3689 | 6327  |
| 9176 B | 63 | 11GRO-1 | 0.1707 | 977  | 2479 | 4627  |
| 9177 B | 64 | 11GRO-1 | 0.1642 | 723  | 1991 | 3898  |
| 9178 B | 65 | 11GRO-1 | 0.1730 | 1113 | 2627 | 4836  |
| 9179 B | 66 | 11GRO-1 | 0.1846 | 1725 | 3602 | 6204  |
| 9180 B | 67 | 11GRO-1 | 0.1986 | 2612 | 5045 | 8114  |
| 9181 B | 68 | 11GRO-1 | 0.1737 | 1130 | 2706 | 4987  |
| 9182 B | 69 | 11GRO-1 | 0.2000 | 2836 | 5199 | 8329  |

|          |    |               |        |      |       |       |
|----------|----|---------------|--------|------|-------|-------|
| 9183 B   | 70 | 11GRO-1       | 0.1939 | 2336 | 4544  | 7429  |
| 9184 B   | 71 | 11GRO-1       | 0.1814 | 1497 | 3325  | 5838  |
| 9185 B   | 72 | 11GRO-1       | 0.1749 | 1162 | 2758  | 4995  |
| 9186 B   | 73 | 11GRO-1       | 0.1761 | 1217 | 2898  | 5293  |
| 9187 B   | 74 | 11GRO-1       | 0.1963 | 2521 | 4807  | 7876  |
| 9250A    | 1  | Whale Bone    | 0.1889 | 2013 | 4032  | 6644  |
| 9251A    | 2  | Whale Bone    | 0.2118 | 3845 | 6689  | 10454 |
| 9252A    | 3  | Whale Bone    | 0.1518 | 367  | 1202  | 2601  |
| 9253A    | 4  | Whale Bone    | 0.1883 | 1941 | 3961  | 6680  |
| 9254A    | 5  | Whale Bone    | 0.1868 | 1835 | 3827  | 6533  |
| 9255A    | 6  | Whale Bone    | 0.1870 | 1818 | 3848  | 6589  |
| 9256A    | 7  | Whale Bone    | 0.2409 | 6460 | 11663 | 20552 |
| 9257A    | 8  | Whale Bone    | 0.1854 | 1748 | 3704  | 6338  |
| 9258A    | 9  | Whale Bone    | 0.2033 | 3069 | 5585  | 8935  |
| 9259A    | 10 | Whale Bone    | 0.2014 | 2927 | 5401  | 8681  |
| 9260A    | 11 | Whale Bone    | 0.1778 | 1343 | 3014  | 5412  |
| 9261A    | 12 | Whale Bone    | 0.2277 | 5300 | 9129  | 14911 |
| 9262A    | 13 | Whale Bone    | 0.1926 | 2247 | 4421  | 7321  |
| 9263A    | 14 | Whale Bone    | 0.1566 | 505  | 1488  | 3027  |
| 9264A    | 15 | Whale Bone    | 0.1966 | 2581 | 4828  | 7833  |
| 9265A    | 16 | Whale Bone    | 0.1868 | 1789 | 3822  | 6523  |
| 9266A    | 17 | Whale Bone    | 0.1713 | 1023 | 2504  | 4627  |
| 9267A    | 18 | Whale Bone    | 0.1774 | 1301 | 2994  | 5350  |
| 9268A    | 19 | Whale Bone    | 0.1579 | 551  | 1566  | 3164  |
| 9269A    | 20 | Whale Bone    | 0.1877 | 1885 | 3926  | 6605  |
| 9270A    | 21 | Whale Bone    | 0.1860 | 1762 | 3741  | 6496  |
| 9271A    | 22 | Whale Bone    | 0.1765 | 1243 | 2915  | 5211  |
| 9273A    | 24 | Whale Bone    | 0.2267 | 5233 | 8951  | 14665 |
| 9274A    | 25 | Whale Bone    | 0.1946 | 2437 | 4623  | 7610  |
| 9276A    | 27 | Whale Bone    | 0.1644 | 769  | 2014  | 3877  |
| 9277A    | 28 | Whale Bone    | 0.1711 | 1001 | 2497  | 4667  |
| 9278A    | 29 | Whale Bone    | 0.1691 | 896  | 2333  | 4502  |
| 9280A    | 31 | Whale Bone    | 0.1867 | 1792 | 3827  | 6540  |
| 9281A    | 32 | Whale Bone    | 0.1915 | 2209 | 4323  | 7242  |
| 9282A    | 33 | Whale Bone    | 0.1823 | 1537 | 3429  | 6038  |
| 9283A    | 34 | Whale Bone    | 0.1662 | 783  | 2141  | 4017  |
| 9284A    | 35 | Whale Bone    | 0.1935 | 2267 | 4475  | 7415  |
| 9293A    | 44 | Whale Bone    | 0.1843 | 1661 | 3572  | 6145  |
| 9294A    | 45 | Whale Bone    | 0.1906 | 2099 | 4189  | 6981  |
| 9309A    | 60 | Whale Bone    | 0.1689 | 914  | 2350  | 4424  |
| 9310A    | 61 | Whale Bone    | 0.1943 | 2339 | 4572  | 7593  |
| 9287B    | 38 | Whale Bone    | 0.1489 | 261  | 1031  | 2324  |
| 9288B    | 39 | Whale Bone    | 0.1874 | 1860 | 3879  | 6496  |
| 9289B    | 40 | Whale Bone    | 0.1937 | 2290 | 4546  | 7472  |
| 9290B    | 41 | Whale Bone    | 0.1902 | 2054 | 4172  | 6947  |
| 9291B    | 42 | Whale Bone    | 0.1928 | 2210 | 4414  | 7330  |
| 9292B    | 43 | Whale Bone    | 0.1973 | 2610 | 4907  | 7907  |
| 9295B    | 46 | Whale Bone    | 0.1742 | 1137 | 2717  | 4935  |
| 9296B    | 47 | Whale Bone    | 0.2182 | 4514 | 7609  | 11950 |
| 9297B    | 48 | Whale Bone    | 0.1826 | 1574 | 3446  | 6110  |
| 9298B    | 49 | Whale Bone    | 0.1823 | 1553 | 3407  | 5852  |
| 9299B    | 50 | Whale Bone    | 0.2049 | 3230 | 5776  | 9174  |
| 9300B    | 51 | Whale Bone    | 0.1946 | 2432 | 4583  | 7374  |
| 9301B    | 52 | Whale Bone    | 0.1850 | 1703 | 3653  | 6315  |
| 9302B    | 53 | Whale Bone    | 0.2223 | 4811 | 8232  | 13308 |
| 9303B    | 54 | Whale Bone    | 0.2082 | 3480 | 6225  | 9793  |
| 9304B    | 55 | Whale Bone    | 0.1890 | 1982 | 4014  | 6814  |
| 9305B    | 56 | Whale Bone    | 0.1989 | 2763 | 5118  | 8317  |
| 9306B    | 57 | Whale Bone    | 0.1703 | 989  | 2451  | 4646  |
| 9307B    | 58 | Whale Bone    | 0.2210 | 4666 | 8052  | 13050 |
| 9308B    | 59 | Whale Bone    | 0.1932 | 2302 | 4486  | 7442  |
| 7617A-2  | 13 | 09-GRO-Shell3 | 0.1954 | 2503 | 4698  | 7625  |
| 7617B-2  | 14 | 09-GRO-Shell3 | 0.1980 | 2678 | 4980  | 8006  |
| 7617C-2  | 15 | 09-GRO-Shell3 | 0.2024 | 3007 | 5503  | 8764  |
| 7.62E+01 | 18 | 09-GRO-Shell3 | 0.1833 | 1641 | 3512  | 6151  |

|           |    |               |        |      |      |      |
|-----------|----|---------------|--------|------|------|------|
| 7617F-2   | 19 | 09-GRO-Shell3 | 0.1893 | 2024 | 4080 | 6889 |
| 7617DDD-2 | 22 | 09-GRO-Shell3 | 0.1991 | 2715 | 5095 | 8228 |
| 7617G-2   | 23 | 09-GRO-Shell3 | 0.1912 | 2127 | 4279 | 7061 |
| 7617EEE-2 | 25 | 09-GRO-Shell3 | 0.1970 | 2622 | 4875 | 7912 |
| 7617I-2   | 26 | 09-GRO-Shell3 | 0.1837 | 1684 | 3544 | 6239 |
| 7617K-2   | 28 | 09-GRO-Shell3 | 0.1829 | 1615 | 3459 | 5949 |
| 7617M-2   | 30 | 09-GRO-Shell3 | 0.1852 | 1759 | 3695 | 6296 |
| 7617O-2   | 34 | 09-GRO-Shell3 | 0.1878 | 1923 | 3932 | 6699 |
| 7617P-2   | 36 | 09-GRO-Shell3 | 0.1954 | 2397 | 4681 | 7667 |
| 7617Q-2   | 37 | 09-GRO-Shell3 | 0.1916 | 2191 | 4327 | 7302 |
| 7617R-2   | 38 | 09-GRO-Shell3 | 0.1974 | 2581 | 4890 | 7952 |
| 7617S-2   | 39 | 09-GRO-Shell3 | 0.1955 | 2466 | 4713 | 7702 |
| 7617U-2   | 41 | 09-GRO-Shell3 | 0.1844 | 1702 | 3613 | 6296 |
| 7617X-2   | 49 | 09-GRO-Shell3 | 0.1803 | 1417 | 3244 | 5697 |
| 7617Y-2   | 50 | 09-GRO-Shell3 | 0.1855 | 1739 | 3721 | 6371 |
| 7617Z-2   | 51 | 09-GRO-Shell3 | 0.1793 | 1414 | 3167 | 5621 |
| 7617AA-2  | 53 | 09-GRO-Shell3 | 0.1936 | 2299 | 4499 | 7394 |
| 7617BB-2  | 55 | 09-GRO-Shell3 | 0.1703 | 994  | 2435 | 4518 |
| 7617DD-2  | 57 | 09-GRO-Shell3 | 0.1737 | 1102 | 2682 | 4927 |
| 7617FF-2  | 59 | 09-GRO-Shell3 | 0.1783 | 1355 | 3067 | 5532 |
| 7617GG-2  | 60 | 09-GRO-Shell3 | 0.1797 | 1425 | 3203 | 5719 |
| 7617JJ-2  | 64 | 09-GRO-Shell3 | 0.1990 | 2741 | 5084 | 8183 |
| 7617NN-2  | 68 | 09-GRO-Shell3 | 0.2077 | 3473 | 6147 | 9654 |
| 7617OO-2  | 70 | 09-GRO-Shell3 | 0.1861 | 1810 | 3770 | 6434 |
| 7617RR-2  | 75 | 09-GRO-Shell3 | 0.1432 | 69   | 713  | 1933 |
| 7617SS-2  | 77 | 09-GRO-Shell3 | 0.1828 | 1617 | 3476 | 6058 |
| 7617VV-2  | 85 | 09-GRO-Shell3 | 0.1890 | 1947 | 4049 | 6752 |
| 7617CCC-2 | 56 | 09-GRO-Shell3 | 0.2079 | 3492 | 6155 | 9720 |
| 7617GGG-2 | 60 | 09-GRO-Shell3 | 0.1837 | 1641 | 3531 | 6071 |
| 7617HHH-2 | 61 | 09-GRO-Shell3 | 0.1574 | 518  | 1548 | 3191 |
| 7617III-2 | 48 | 09-GRO-Shell3 | 0.1779 | 1323 | 3006 | 5368 |
| 7617J-2   | 27 | 09-GRO-Shell3 | 0.1933 | 2243 | 4475 | 7276 |
| 7617LLL-2 | 72 | 09-GRO-Shell3 | 0.2023 | 2920 | 5457 | 8663 |
| 7617UU-2  | 80 | 09-GRO-Shell3 | 0.1888 | 1945 | 4004 | 6676 |
| 7617WW-2  | 86 | 09-GRO-Shell3 | 0.1669 | 812  | 2186 | 4215 |
| 7649A-3   | 1  | 09-GRO-Shell3 | 0.1945 | 2353 | 4596 | 7563 |
| 7649B-3   | 2  | 09-GRO-Shell3 | 0.1820 | 1563 | 3401 | 5896 |
| 7649C-3   | 3  | 09-GRO-Shell3 | 0.1811 | 1518 | 3326 | 5784 |
| 7649D-3   | 4  | 09-GRO-Shell3 | 0.1764 | 1228 | 2927 | 5234 |
| 7.65E+00  | 5  | 09-GRO-Shell3 | 0.2084 | 3567 | 6220 | 9769 |
| 7649F-3   | 6  | 09-GRO-Shell3 | 0.1882 | 1944 | 3984 | 6675 |
| 7649G-3   | 9  | 09-GRO-Shell3 | 0.1837 | 1679 | 3548 | 6131 |
| 7649J-3   | 16 | 09-GRO-Shell3 | 0.2082 | 3446 | 6220 | 9937 |
| 8803 avg  | 13 | 11GRO-9       | 0.1676 | 3280 | 3390 | 3500 |
| 8808 D    | 7  | 11GRO-9       | 0.1877 | 3660 | 3760 | 3860 |
| 8810 D    | 48 | 11GRO-9       | 0.1928 | 4330 | 4370 | 4410 |
| 8816 D    | 12 | 11GRO-9       | 0.1483 | 470  | 530  | 590  |
| 8819 D    | 10 | 11GRO-9       | 0.1719 | 1540 | 1620 | 1700 |
| 8820 D    | 54 | 11GRO-9       | 0.1957 | 4910 | 5050 | 5190 |
| 9155 B    | 42 | 11GRO-1       | 0.1942 | 3980 | 4090 | 4200 |
| 9157 B    | 44 | 11GRO-1       | 0.2117 | 5280 | 5360 | 5440 |
| 9166 B    | 53 | 11GRO-1       | 0.1516 | 480  | 540  | 600  |
| 9168 B    | 55 | 11GRO-1       | 0.2306 | 7570 | 7640 | 7710 |
| 9173 B    | 60 | 11GRO-1       | 0.1673 | 1550 | 1630 | 1710 |
| 9272A     | 23 | Whale Bone    | 0.2280 | 8980 | 9100 | 9220 |
| 9275A     | 26 | Whale Bone    | 0.2138 | 9130 | 9250 | 9370 |
| 9279A     | 30 | Whale Bone    | 0.1883 | 3670 | 3760 | 3850 |
| 9285B     | 36 | Whale Bone    | 0.1487 | 770  | 840  | 910  |
| 9286B     | 37 | Whale Bone    | 0.1682 | 1190 | 1250 | 1310 |
| 7617 H3   | 24 | 09-GRO-Shell3 | 0.1843 | 3920 | 4000 | 4080 |
| 7617 T3   | 40 | 09-GRO-Shell3 | 0.2020 | 5230 | 5280 | 5330 |
| 7649 H3   | 10 | 09-GRO-Shell3 | 0.2000 | 3650 | 3730 | 3810 |
| 7649 I3   | 12 | 09-GRO-Shell3 | 0.1914 | 5260 | 5330 | 5400 |

DR Table 3 – Calibration model fits for Greenland *Mya* specimens. Model parameters as explained in detail by Allen et al. (2013). Columns: “model number” used in DR Figures 3 & 4; “amino acid” is the amino acid used to fit the model; “distribution” is the statistical distribution used to quantify the model uncertainty; “function” is the function used to relate amino acid D/L and radiocarbon age; “ln(a), ln(b), c, ln(R0), ln(d)” are model specific parameters a value of “NA” means that the model in question does not contain that parameter; “n” is the number of specimens used when fitting the model; “k” is the number of parameters in the model; “deviance” is a measure of model fit; “BIC” is Bayes Information Criteria; “BIC” is the difference between the model and the best fit model.

| model number | amino acid | distribution | function    | ln(a)          | ln(b)         | c             | ln(R0)         | ln(d)         | DIC          | n         | k        | deviance      | BIC           |
|--------------|------------|--------------|-------------|----------------|---------------|---------------|----------------|---------------|--------------|-----------|----------|---------------|---------------|
| 1            | Asp        | gamma        | CPK0        | 3.4214         | 2.5196        | NA            | NA             | 5.7091        | 337.1        | 20        | 3        | 330.38        | 339.37        |
| 2            | Asp        | gamma        | TDK0        | 16.3137        | 1.5917        | NA            | NA             | 5.5218        | 333.9        | 20        | 3        | 326.82        | 335.81        |
| 3            | Asp        | gamma        | SPK0        | 16.6265        | 1.6205        | NA            | NA             | 5.5219        | 332.8        | 20        | 3        | 326.65        | 335.64        |
| 4            | Asp        | gamma        | CPK1        | 7.3249         | 1.5900        | 1.5065        | -1.9770        | 5.1508        | 330.2        | 20        | 4        | 321.70        | 333.68        |
| <b>5</b>     | <b>Asp</b> | <b>gamma</b> | <b>TDK1</b> | <b>12.4462</b> | <b>0.3862</b> | <b>1.1998</b> | <b>-2.0310</b> | <b>5.1008</b> | <b>333.7</b> | <b>20</b> | <b>4</b> | <b>321.35</b> | <b>333.33</b> |
| 6            | Asp        | gamma        | SPK1        | 13.7541        | 1.0972        | 1.4926        | -1.9789        | 5.2072        | 333.7        | 20        | 4        | 321.52        | 333.51        |
| 7            | Asp        | lognormal    | CPK0        | 1.9896         | 2.7667        | NA            | NA             | -2.2160       | 339.4        | 20        | 3        | 333.25        | 342.24        |
| 8            | Asp        | lognormal    | TDK0        | 18.0897        | 1.7948        | NA            | NA             | -2.4765       | 335.9        | 20        | 3        | 328.98        | 337.96        |
| 9            | Asp        | lognormal    | SPK0        | 18.4793        | 1.8267        | NA            | NA             | -2.4568       | 335.6        | 20        | 3        | 328.76        | 337.75        |
| 10           | Asp        | lognormal    | CPK1        | 6.9628         | 1.6967        | 1.4836        | -1.9802        | -2.7650       | 334.2        | 20        | 4        | 323.15        | 335.13        |
| 11           | Asp        | lognormal    | TDK1        | 14.5711        | 0.9402        | 0.6289        | -2.2162        | -2.5401       | 336.1        | 20        | 4        | 325.30        | 337.28        |
| 12           | Asp        | lognormal    | SPK1        | 14.0673        | 1.1732        | 1.4656        | -1.9828        | -2.7283       | 337          | 20        | 4        | 322.82        | 334.80        |
| 13           | Glu        | gamma        | CPK0        | 4.5006         | 3.0244        | NA            | NA             | 7.0073        | 364.6        | 20        | 3        | 355.09        | 364.08        |
| 14           | Glu        | gamma        | TDK0        | 17.8690        | 1.3884        | NA            | NA             | 6.9355        | 362          | 20        | 3        | 354.62        | 363.61        |
| 15           | Glu        | gamma        | SPK0        | 17.5248        | 1.3501        | NA            | NA             | 6.9420        | 363.4        | 20        | 3        | 354.63        | 363.62        |
| 16           | Glu        | gamma        | CPK1        | 42.7916        | -31.4601      | 1.3535        | -2.7135        | 6.5704        | 367.5        | 20        | 4        | 351.37        | 363.36        |
| 17           | Glu        | gamma        | TDK1        | 14.0287        | 0.5721        | 0.5711        | -2.9555        | 6.9909        | 361          | 20        | 4        | 354.28        | 366.27        |
| 18           | Glu        | gamma        | SPK1        | 14.0939        | 0.7752        | 1.0552        | -2.7789        | 7.0003        | 362.1        | 20        | 4        | 354.27        | 366.26        |
| 19           | Glu        | lognormal    | CPK0        | 3.2409         | 3.2740        | NA            | NA             | -0.9769       | 374.7        | 20        | 3        | 359.17        | 368.16        |
| 20           | Glu        | lognormal    | TDK0        | 20.1065        | 1.6127        | NA            | NA             | -0.9833       | 365.8        | 20        | 3        | 358.88        | 367.87        |
| 21           | Glu        | lognormal    | SPK0        | 19.5033        | 1.5615        | NA            | NA             | -0.9447       | 366          | 20        | 3        | 358.90        | 367.89        |
| 22           | Glu        | lognormal    | CPK1        | 3.2105         | 3.2845        | -18.0119      | -168.6487      | -0.9477       | 371.2        | 20        | 4        | 359.15        | 371.13        |
| 23           | Glu        | lognormal    | TDK1        | 16.9291        | 1.1588        | -0.2876       | -3.5712        | -0.9688       | 365.9        | 20        | 4        | 358.88        | 370.86        |
| 24           | Glu        | lognormal    | SPK1        | 19.9632        | 1.6020        | -2.8806       | -8.8439        | -0.9731       | 366.7        | 20        | 4        | 358.91        | 370.89        |

DR Figure 1. Histograms of shell ages using various Asp D/L calibrations.

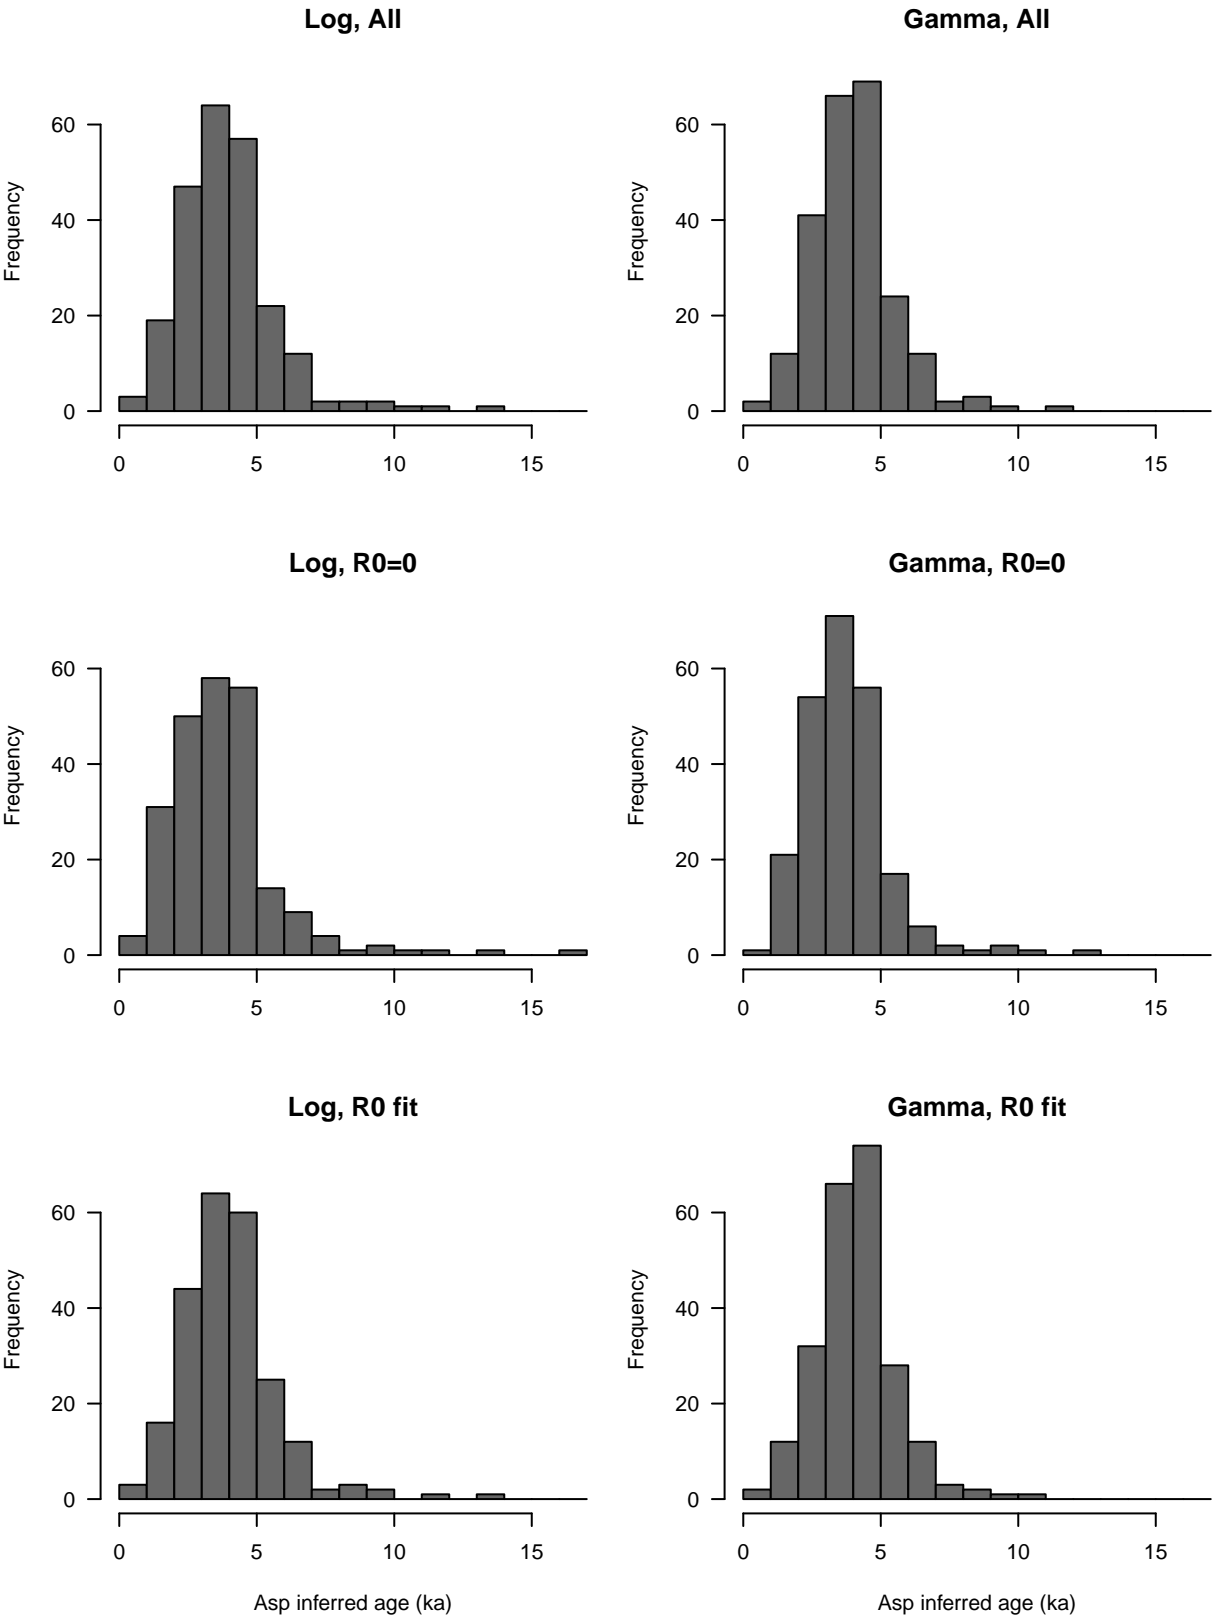

DR Figure 2. Histogram of shell ages indicating specimens removed from analysis based on suspect Asp concentrations. Dark shaded areas indicate ages of specimens removed from the analyses presented in the paper.

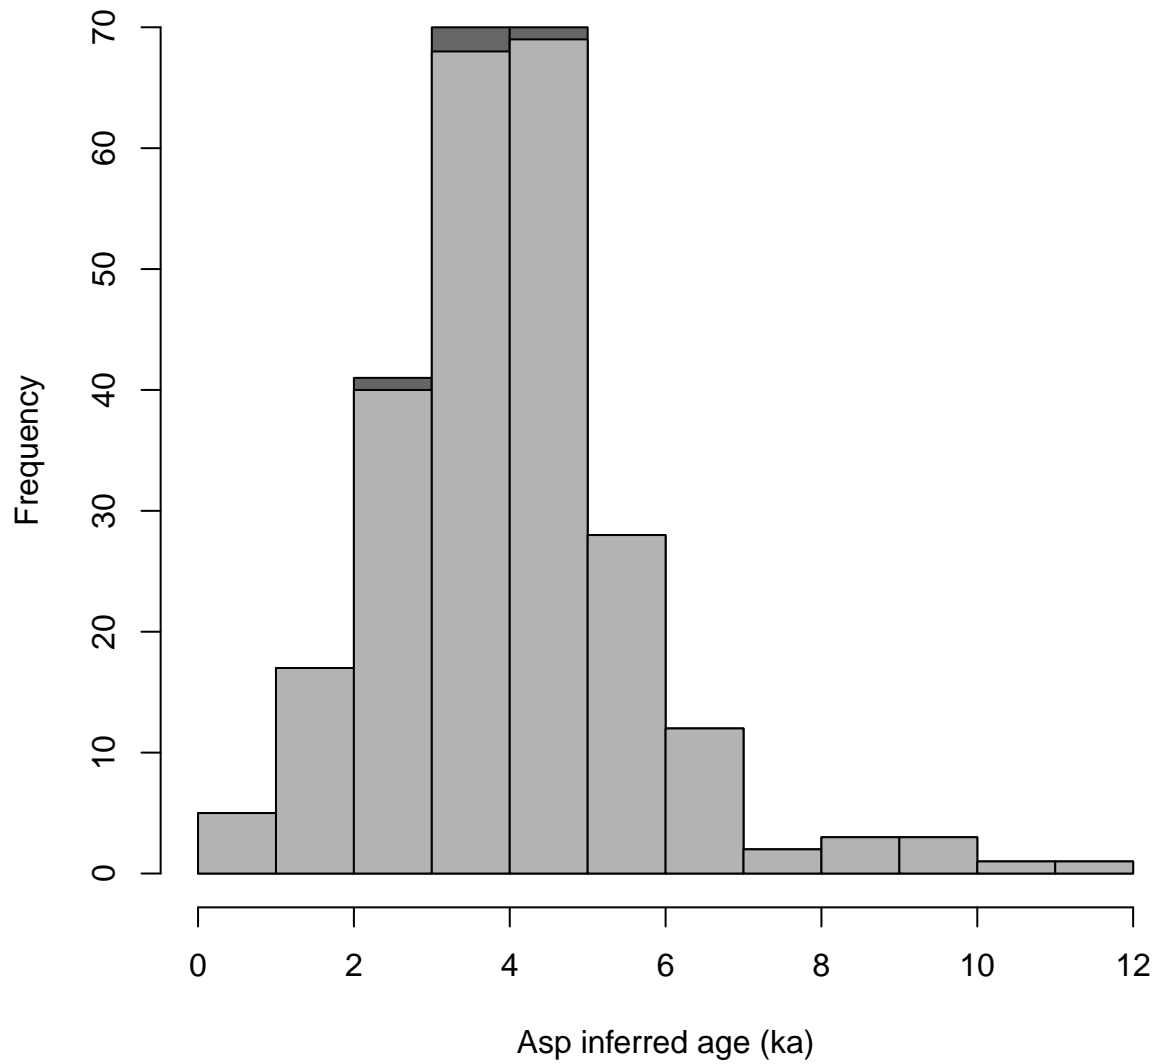



DR Figure 3. Plots of: (a) fitted model with maximum-likelihood parameter estimates (see DR Table 3), (b) relationship of observed to predicted age with one-to-one line, (c) quantile residuals of the fitted model plotted as a function of the D/L, and (d) absolute values of quantile residuals plotted as a function of D/L. Lines depicted in the figures were fitted by lowess with a smoother span of 0.9 (Model 1 from DR Table 3).

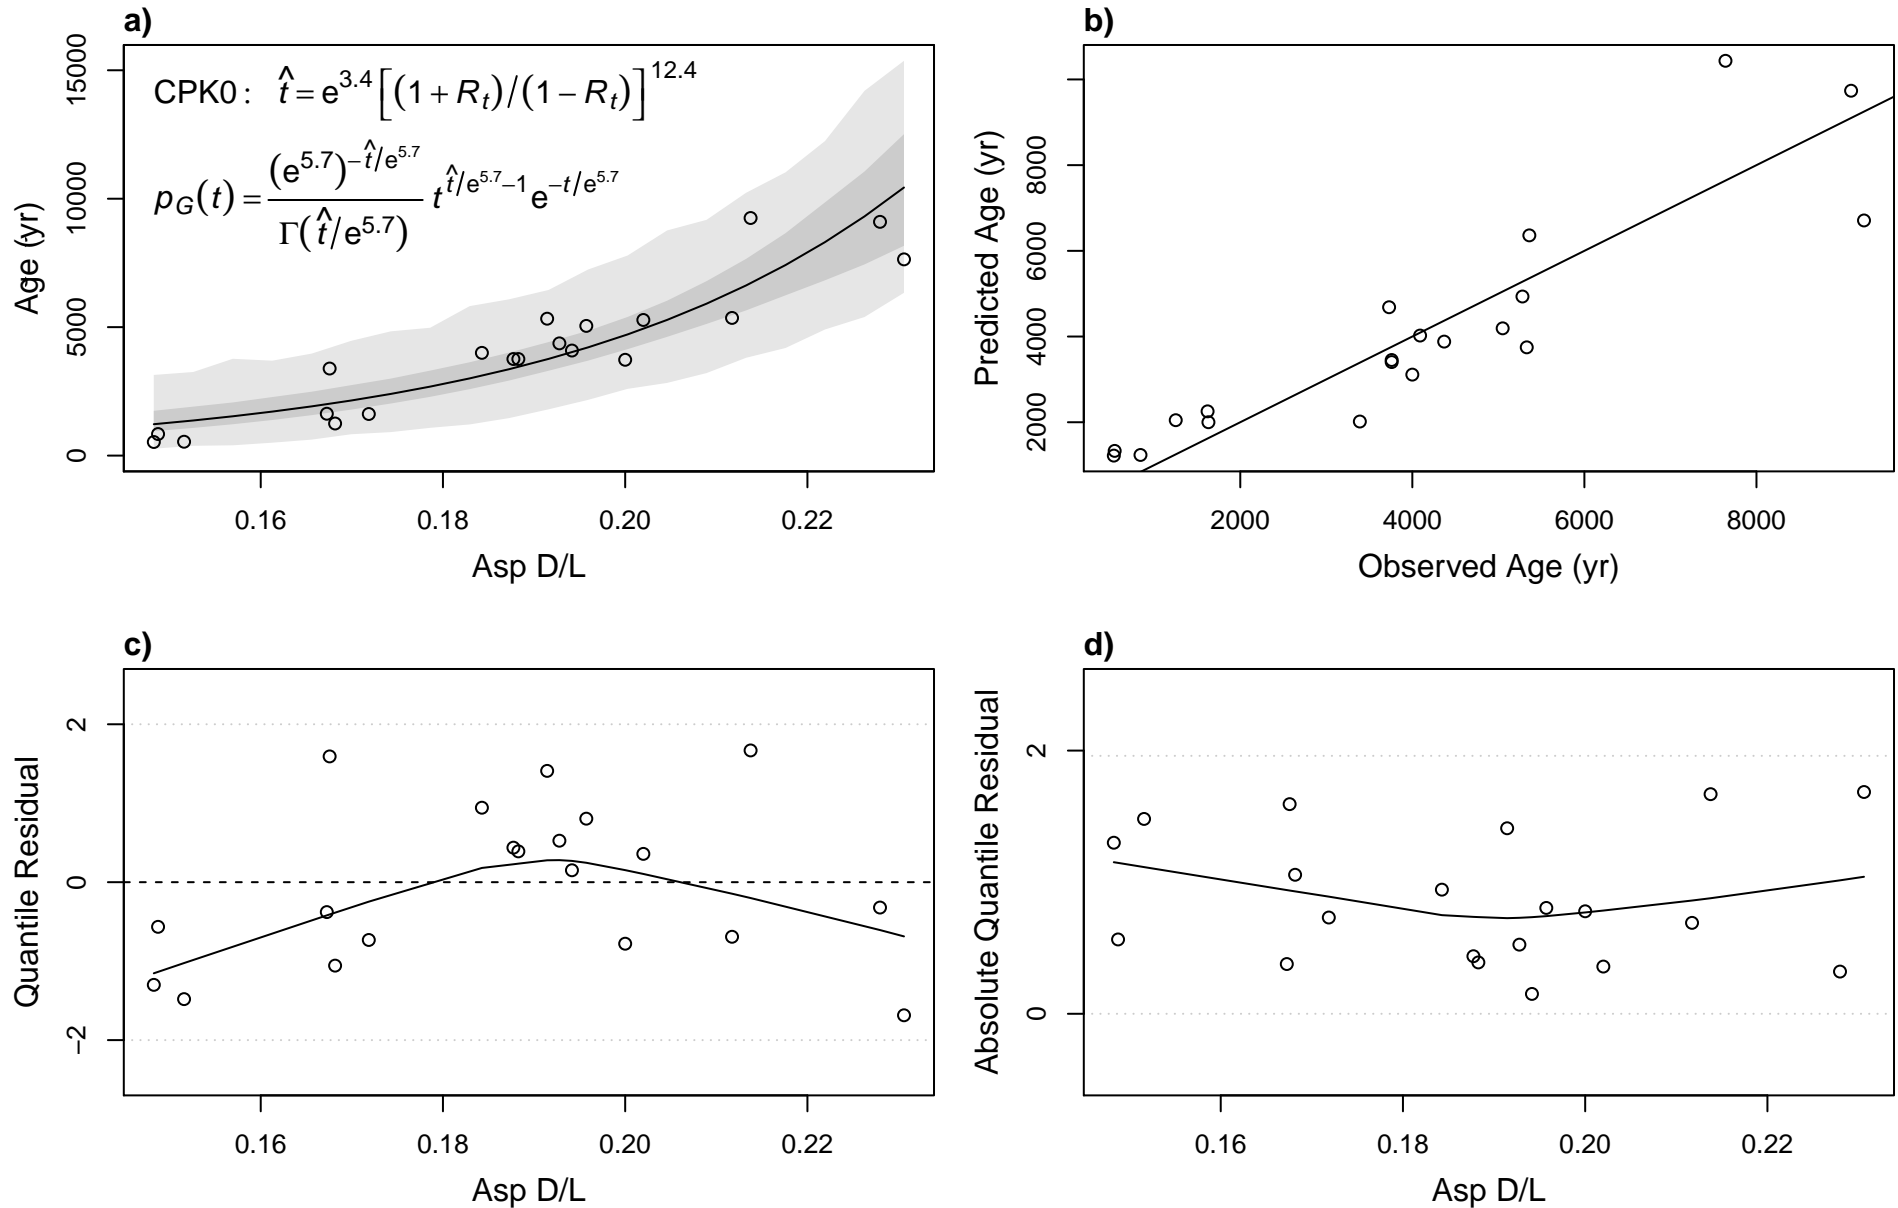

DR Figure 3. Continued: Model 2 (see DR Table 3); Taxon: Mya

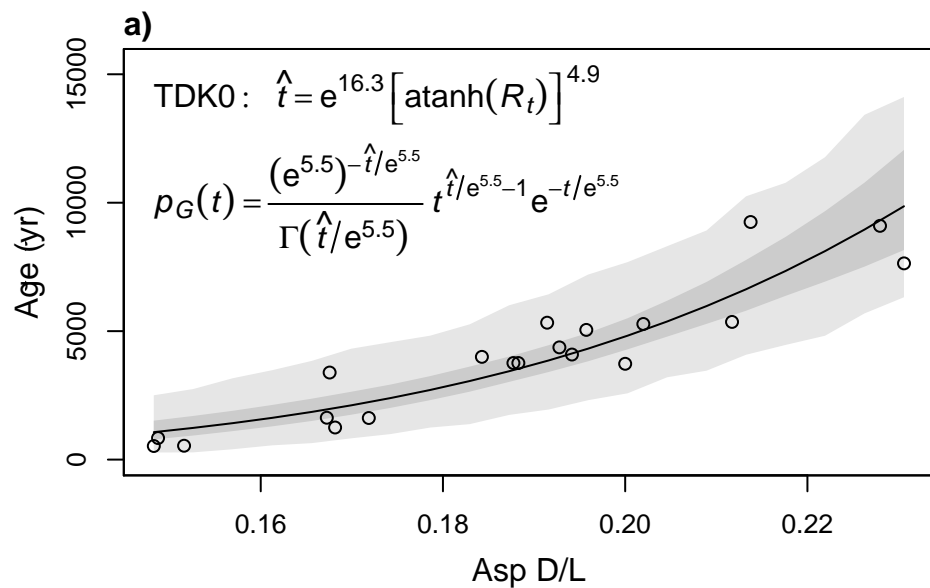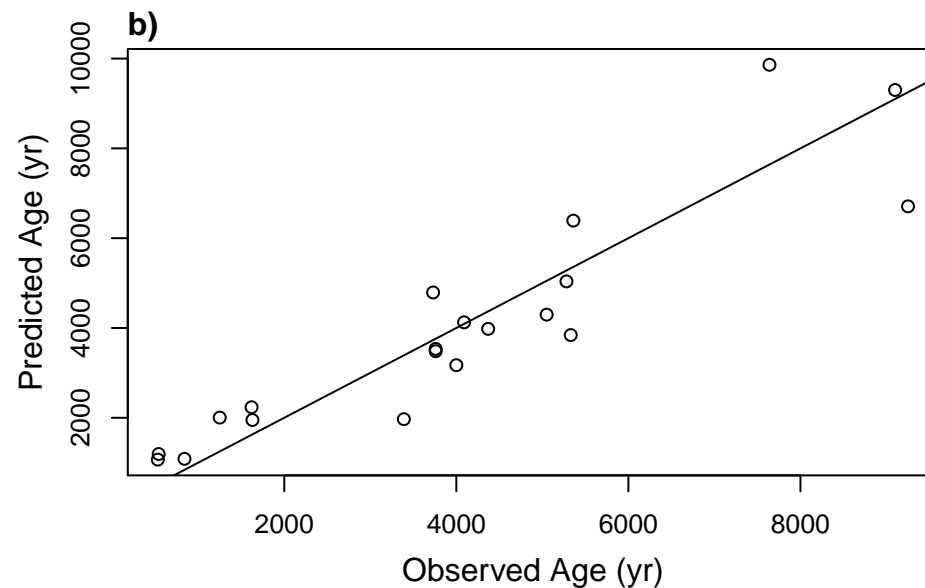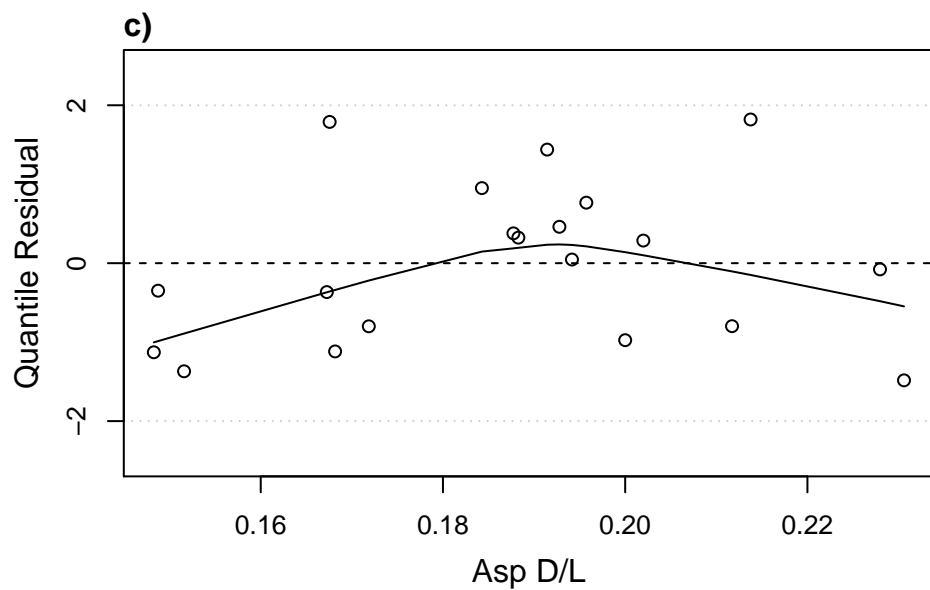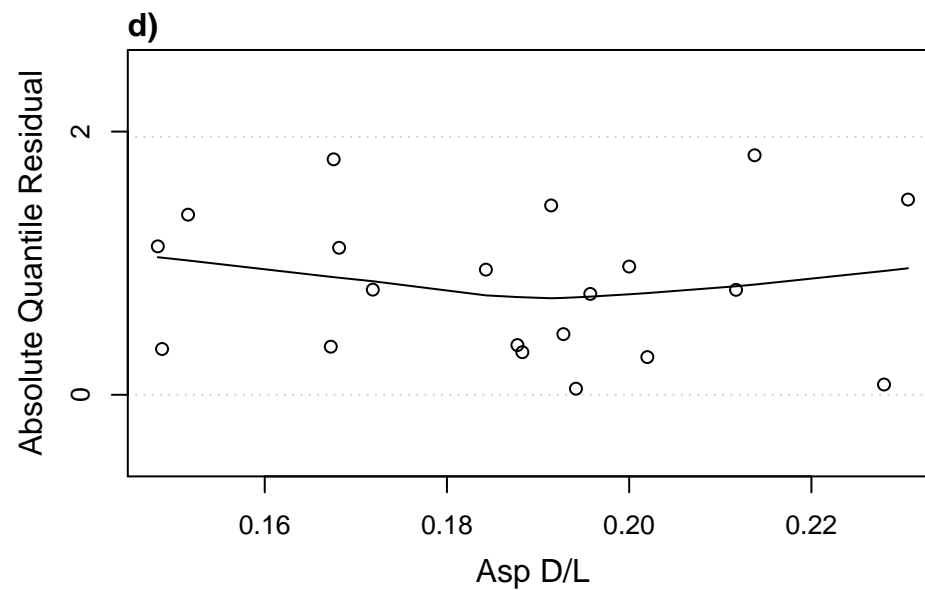

DR Figure 3. Continued: Model 3 (see DR Table 3); Taxon: Mya

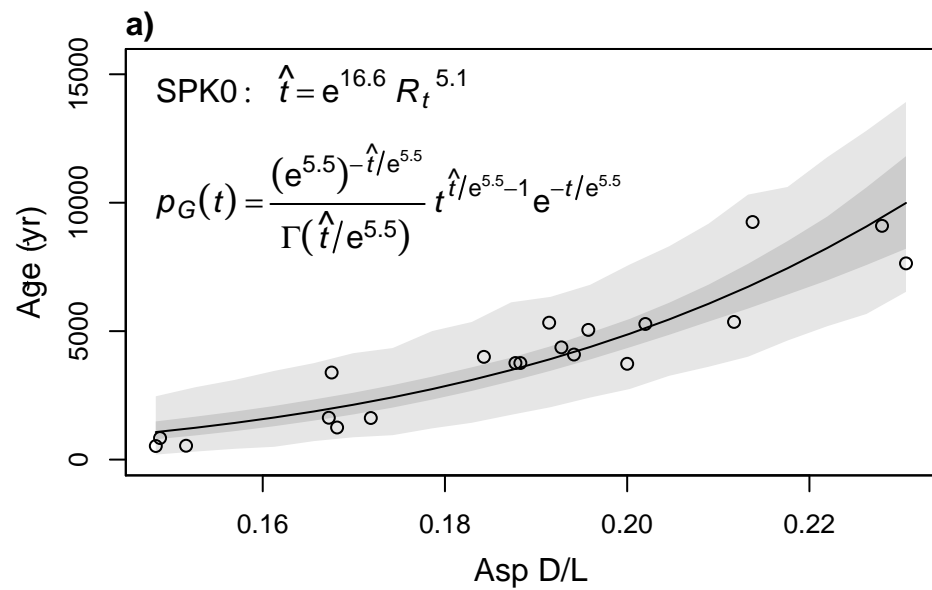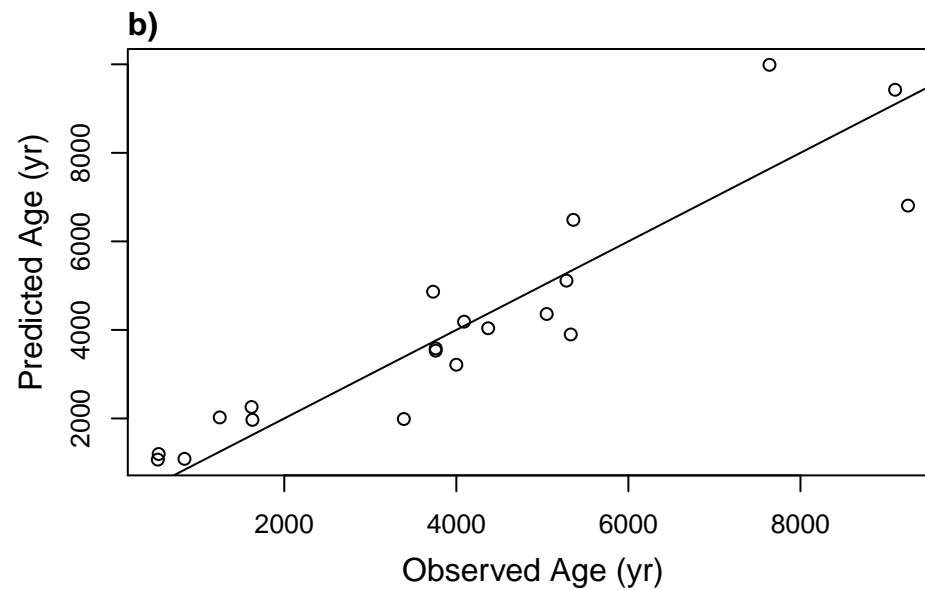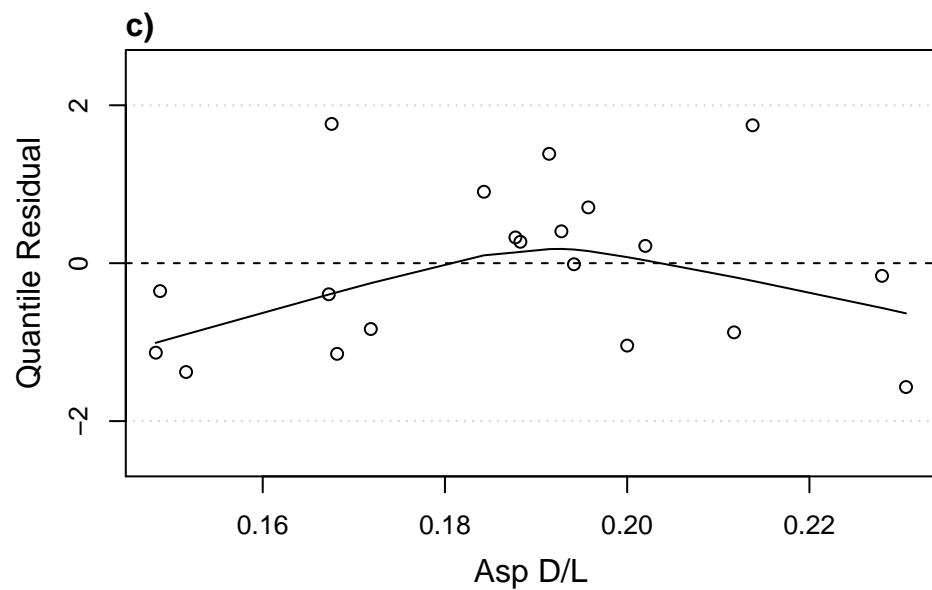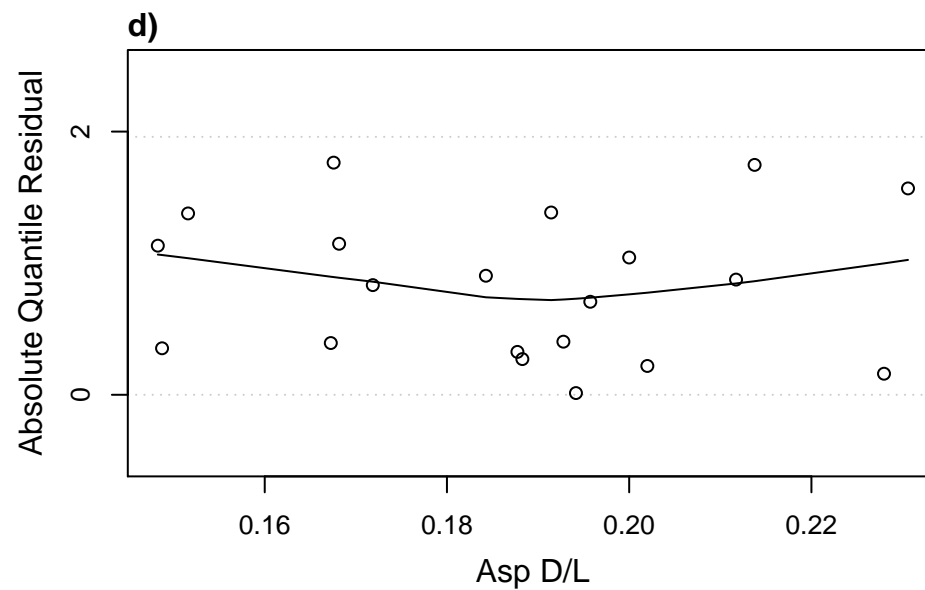

DR Figure 3. Continued: Model 4 (see DR Table 3); Taxon: Mya

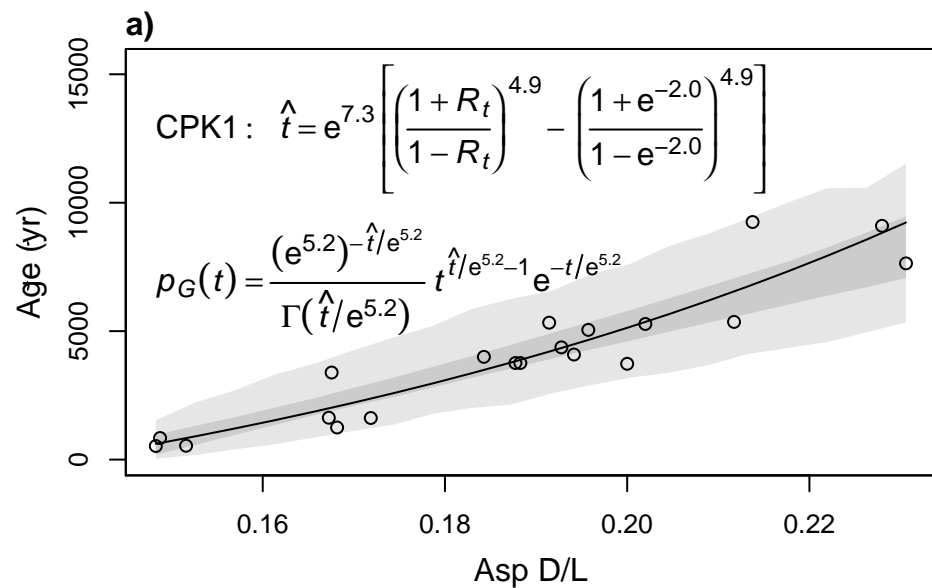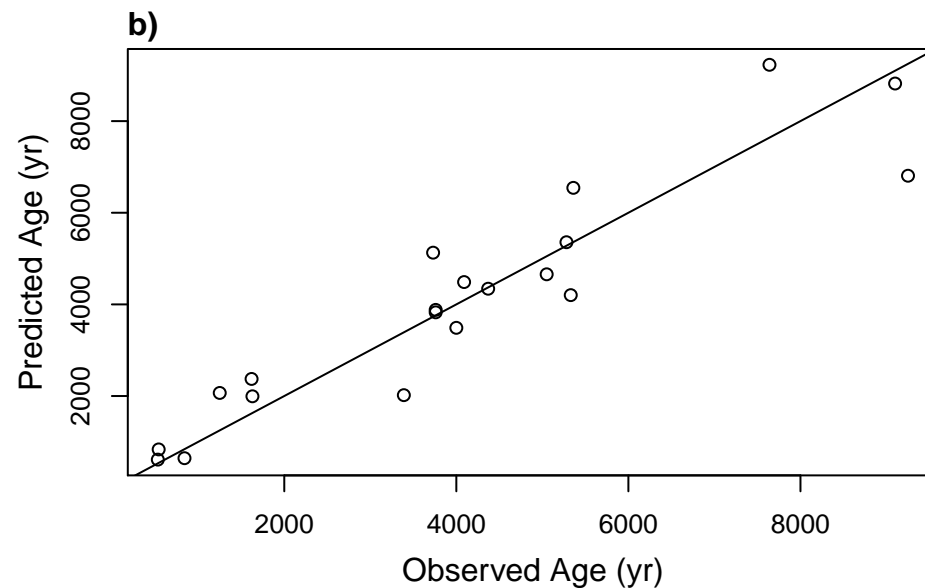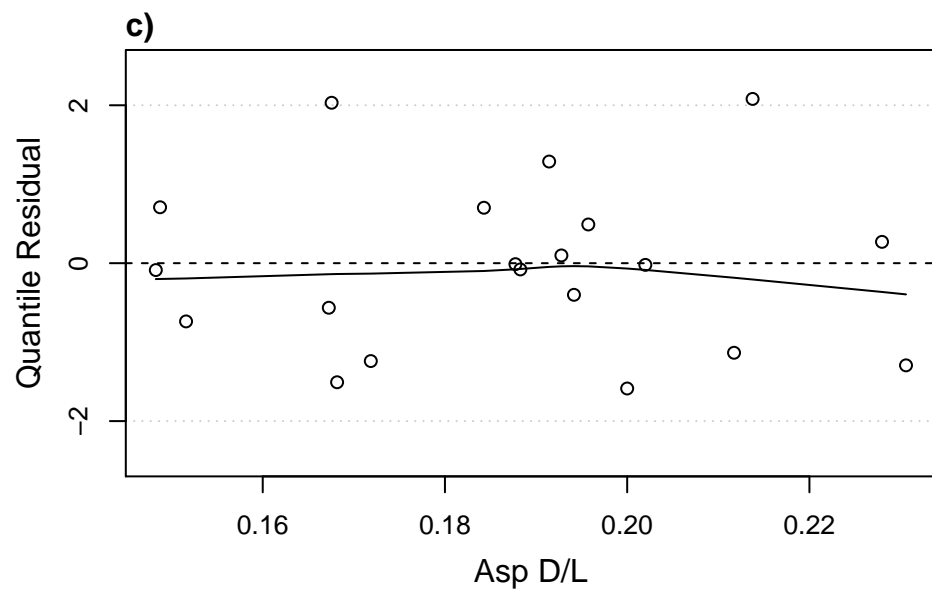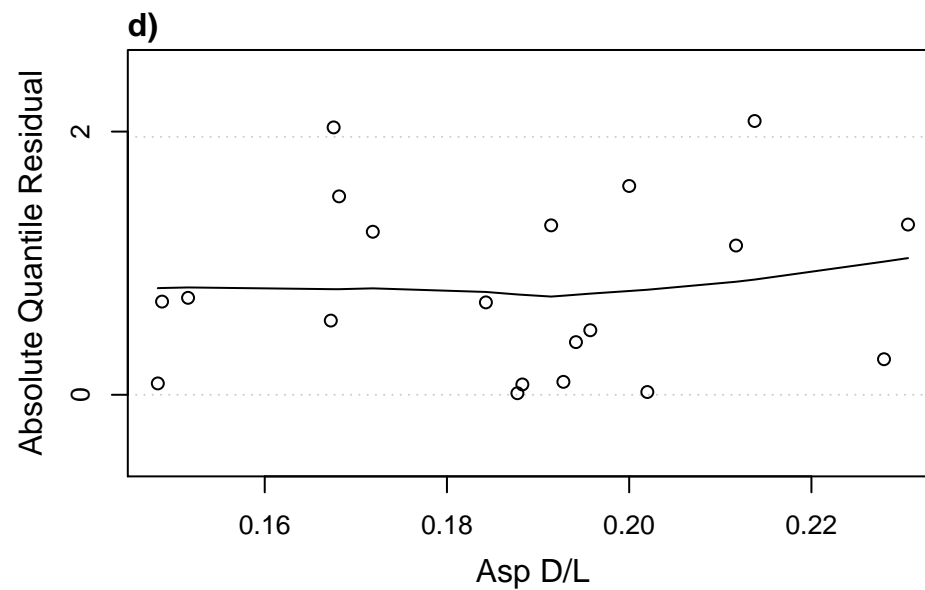

DR Figure 3. Continued: Model 5 (see DR Table 3); Taxon: Mya

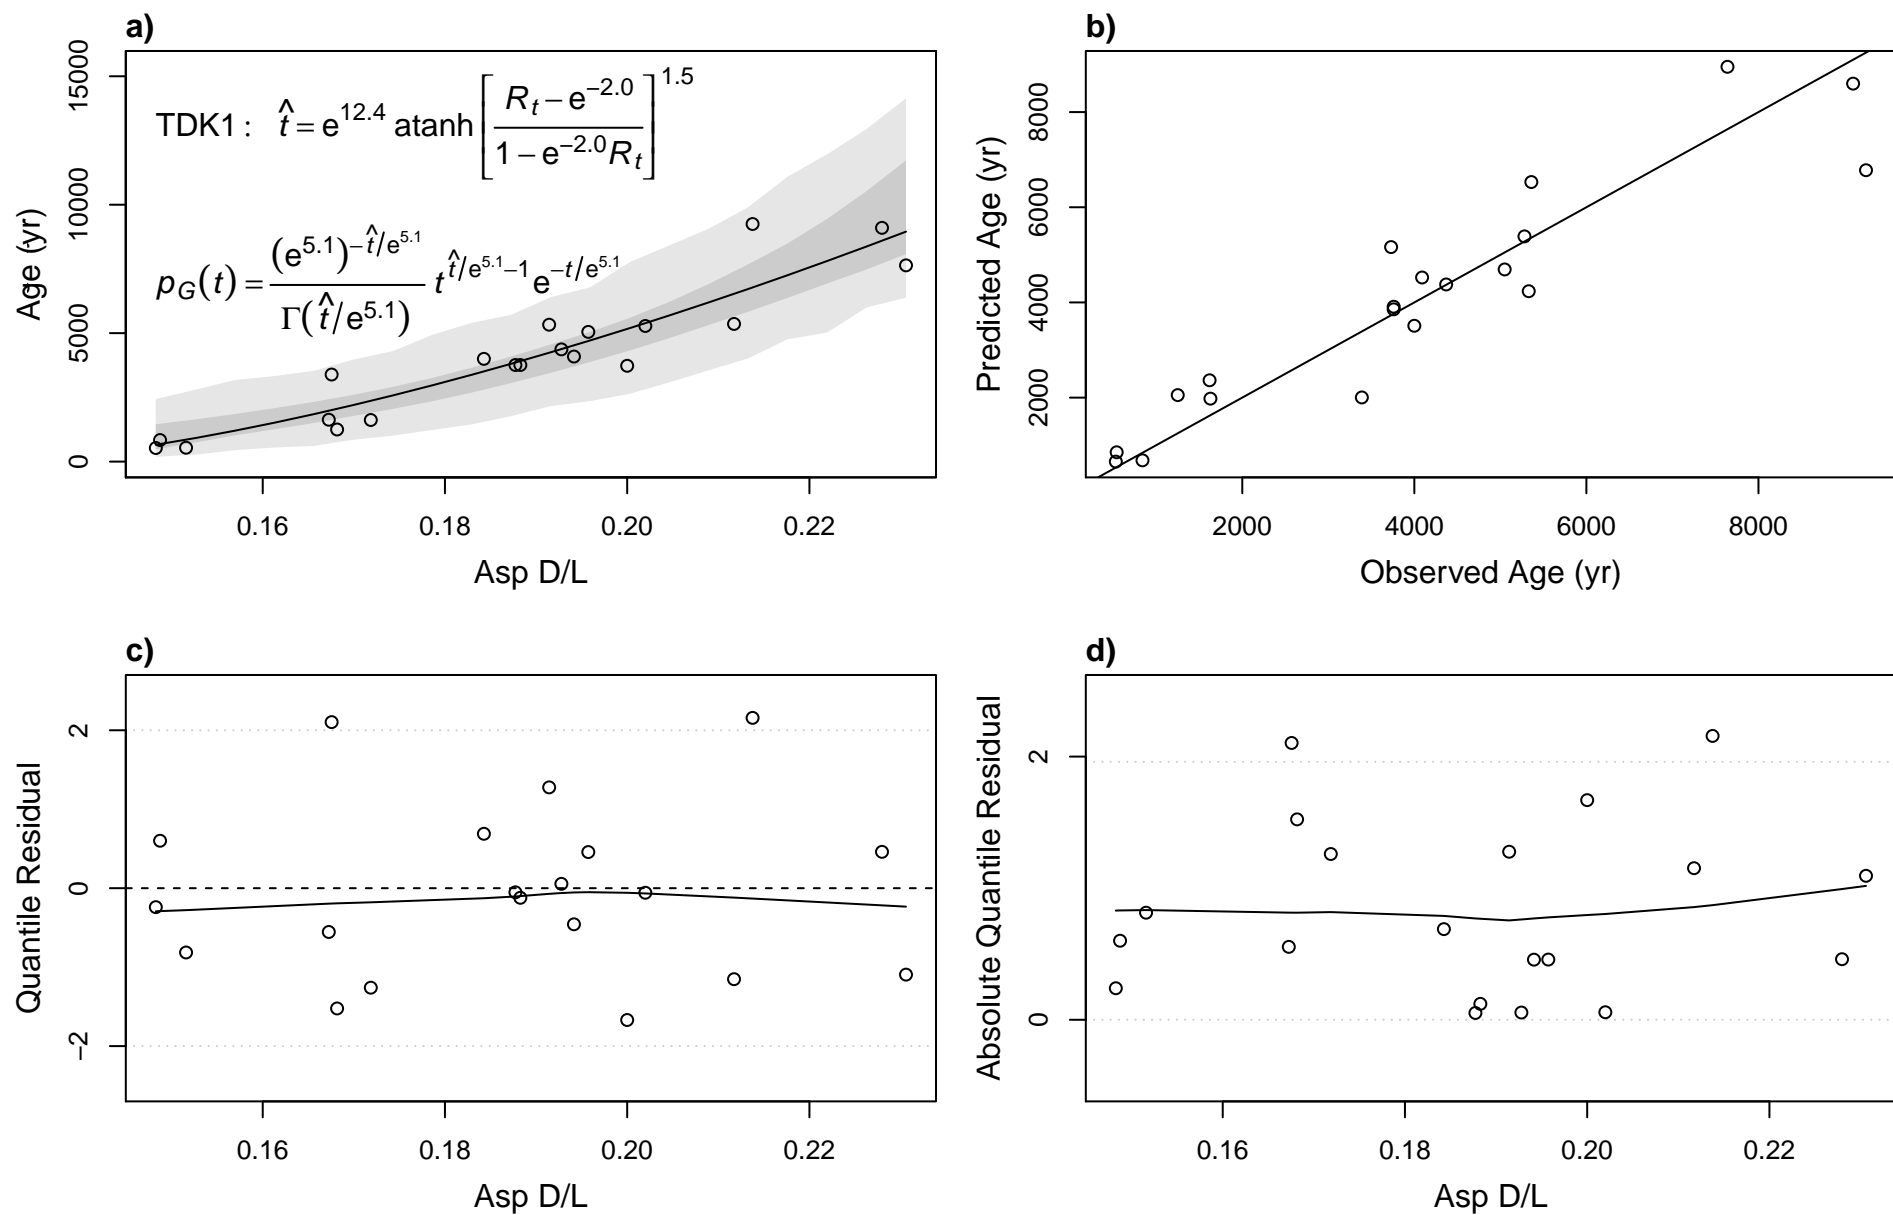

DR Figure 3. Continued: Model 6 (see DR Table 3); Taxon: Mya

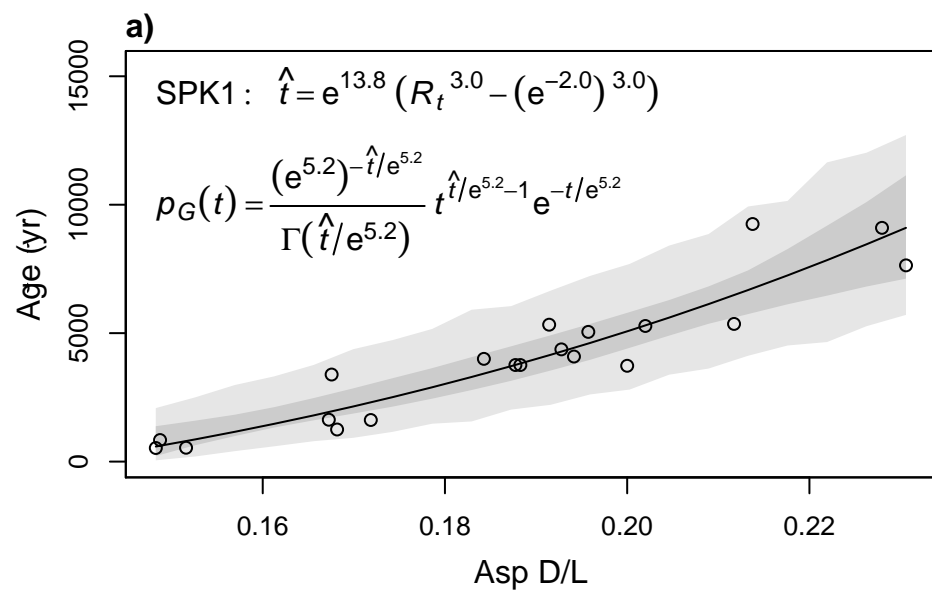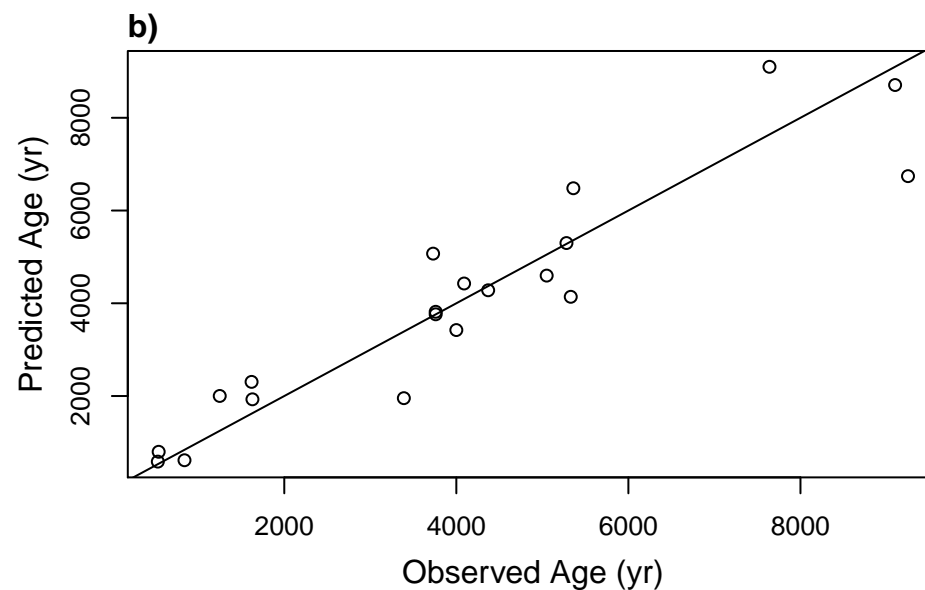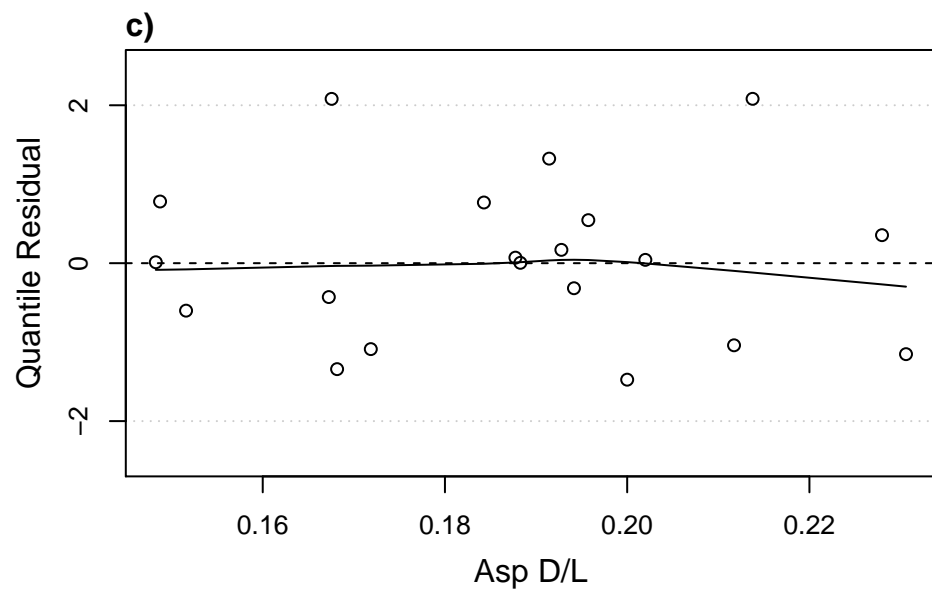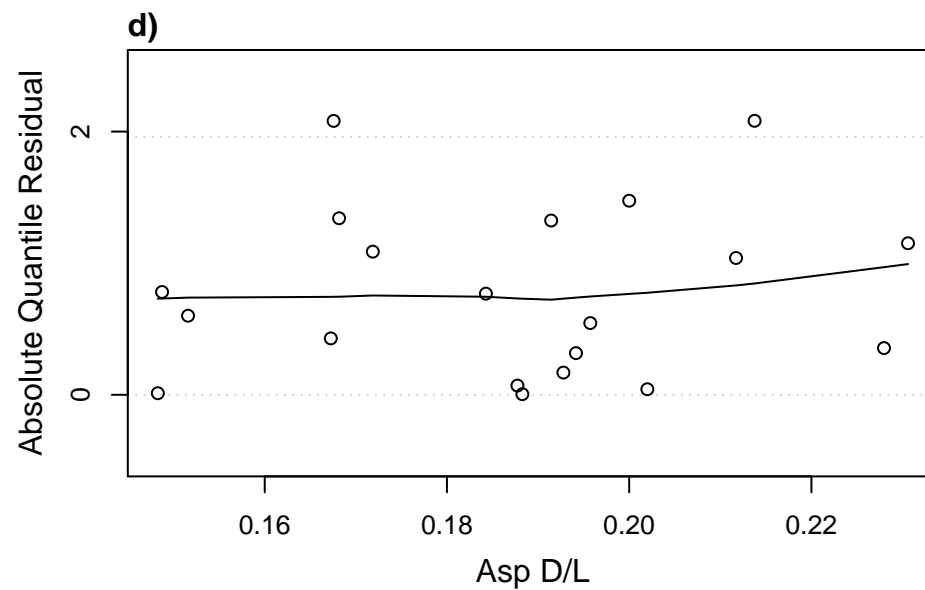

DR Figure 3. Continued: Model 7 (see DR Table 3); Taxon: Mya

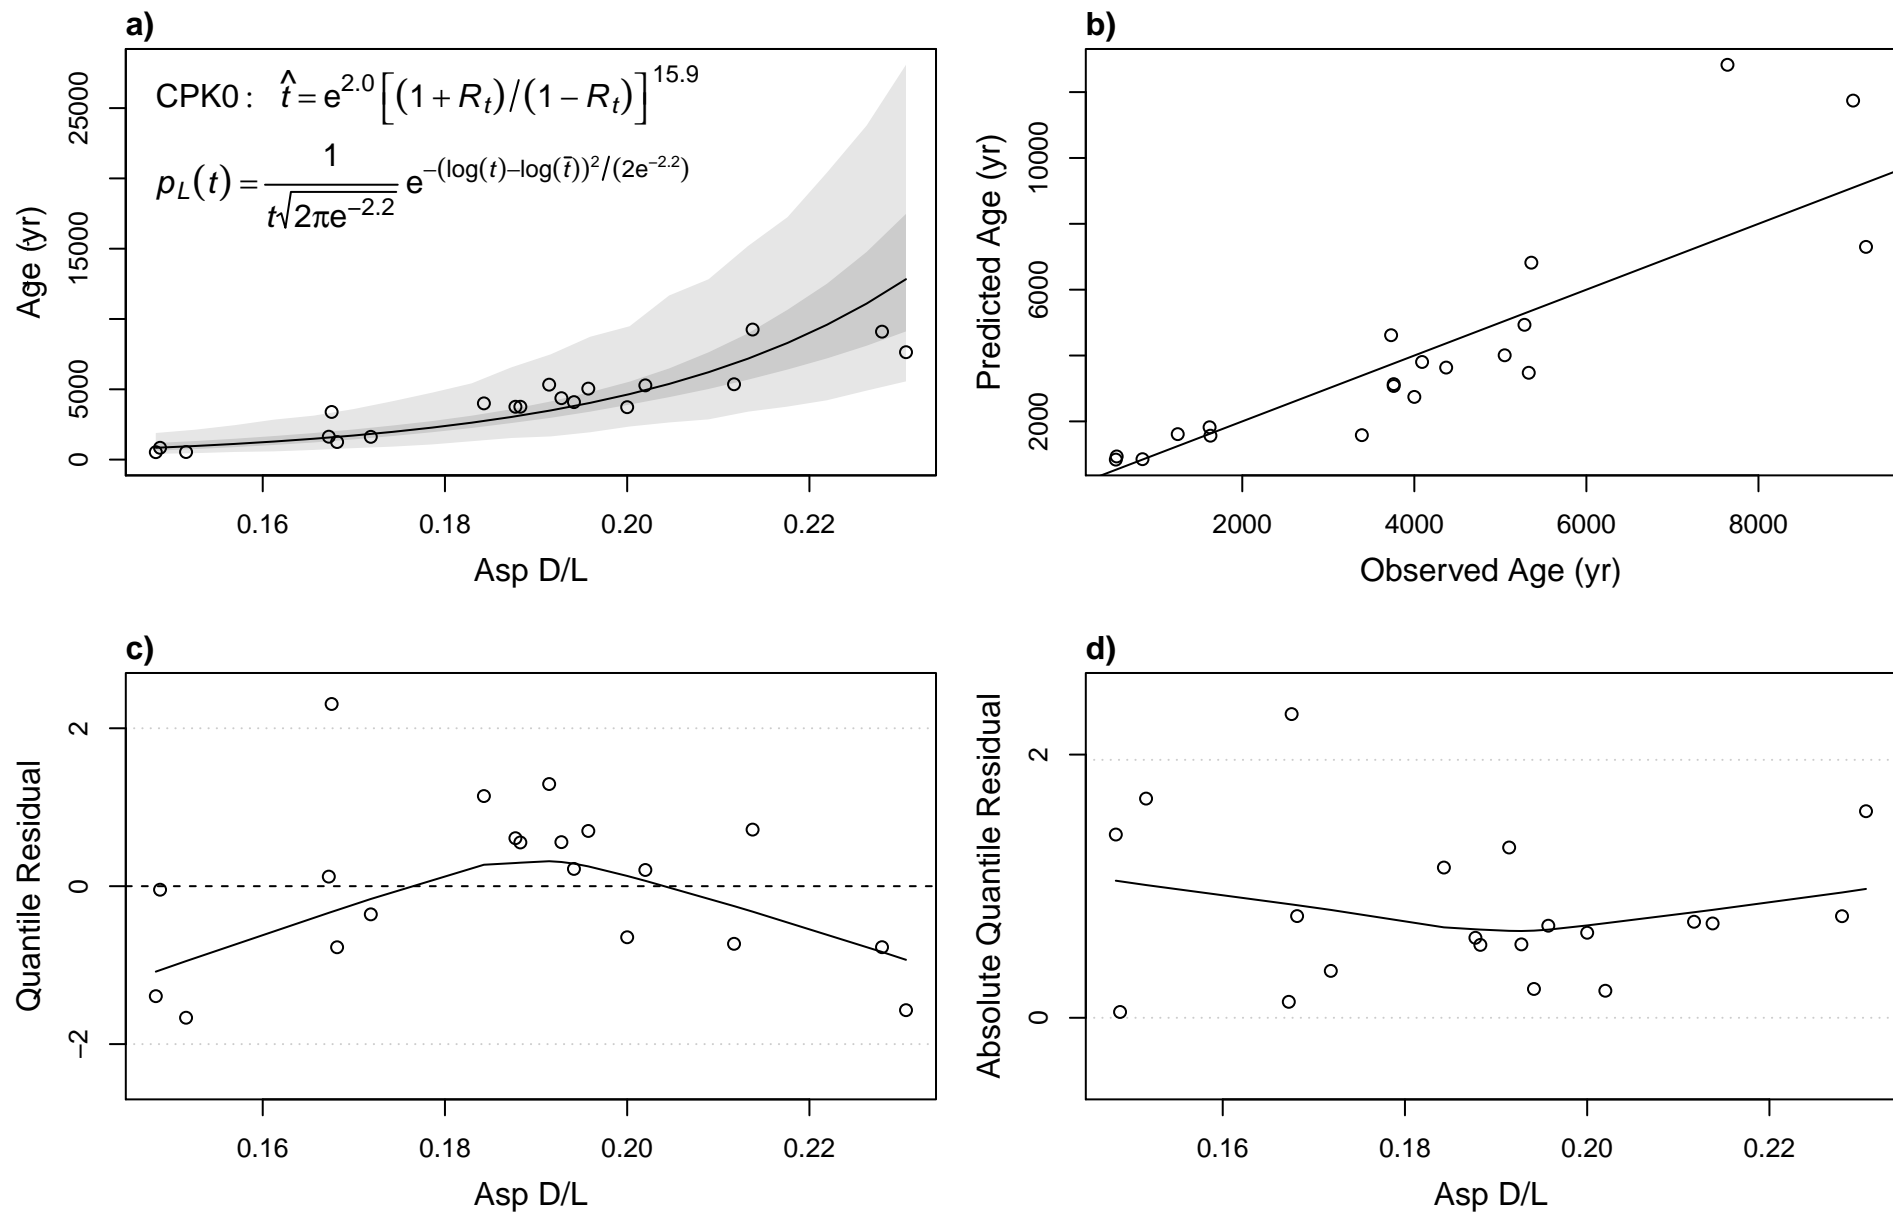

DR Figure 3. Continued: Model 8 (see DR Table 3); Taxon: Mya

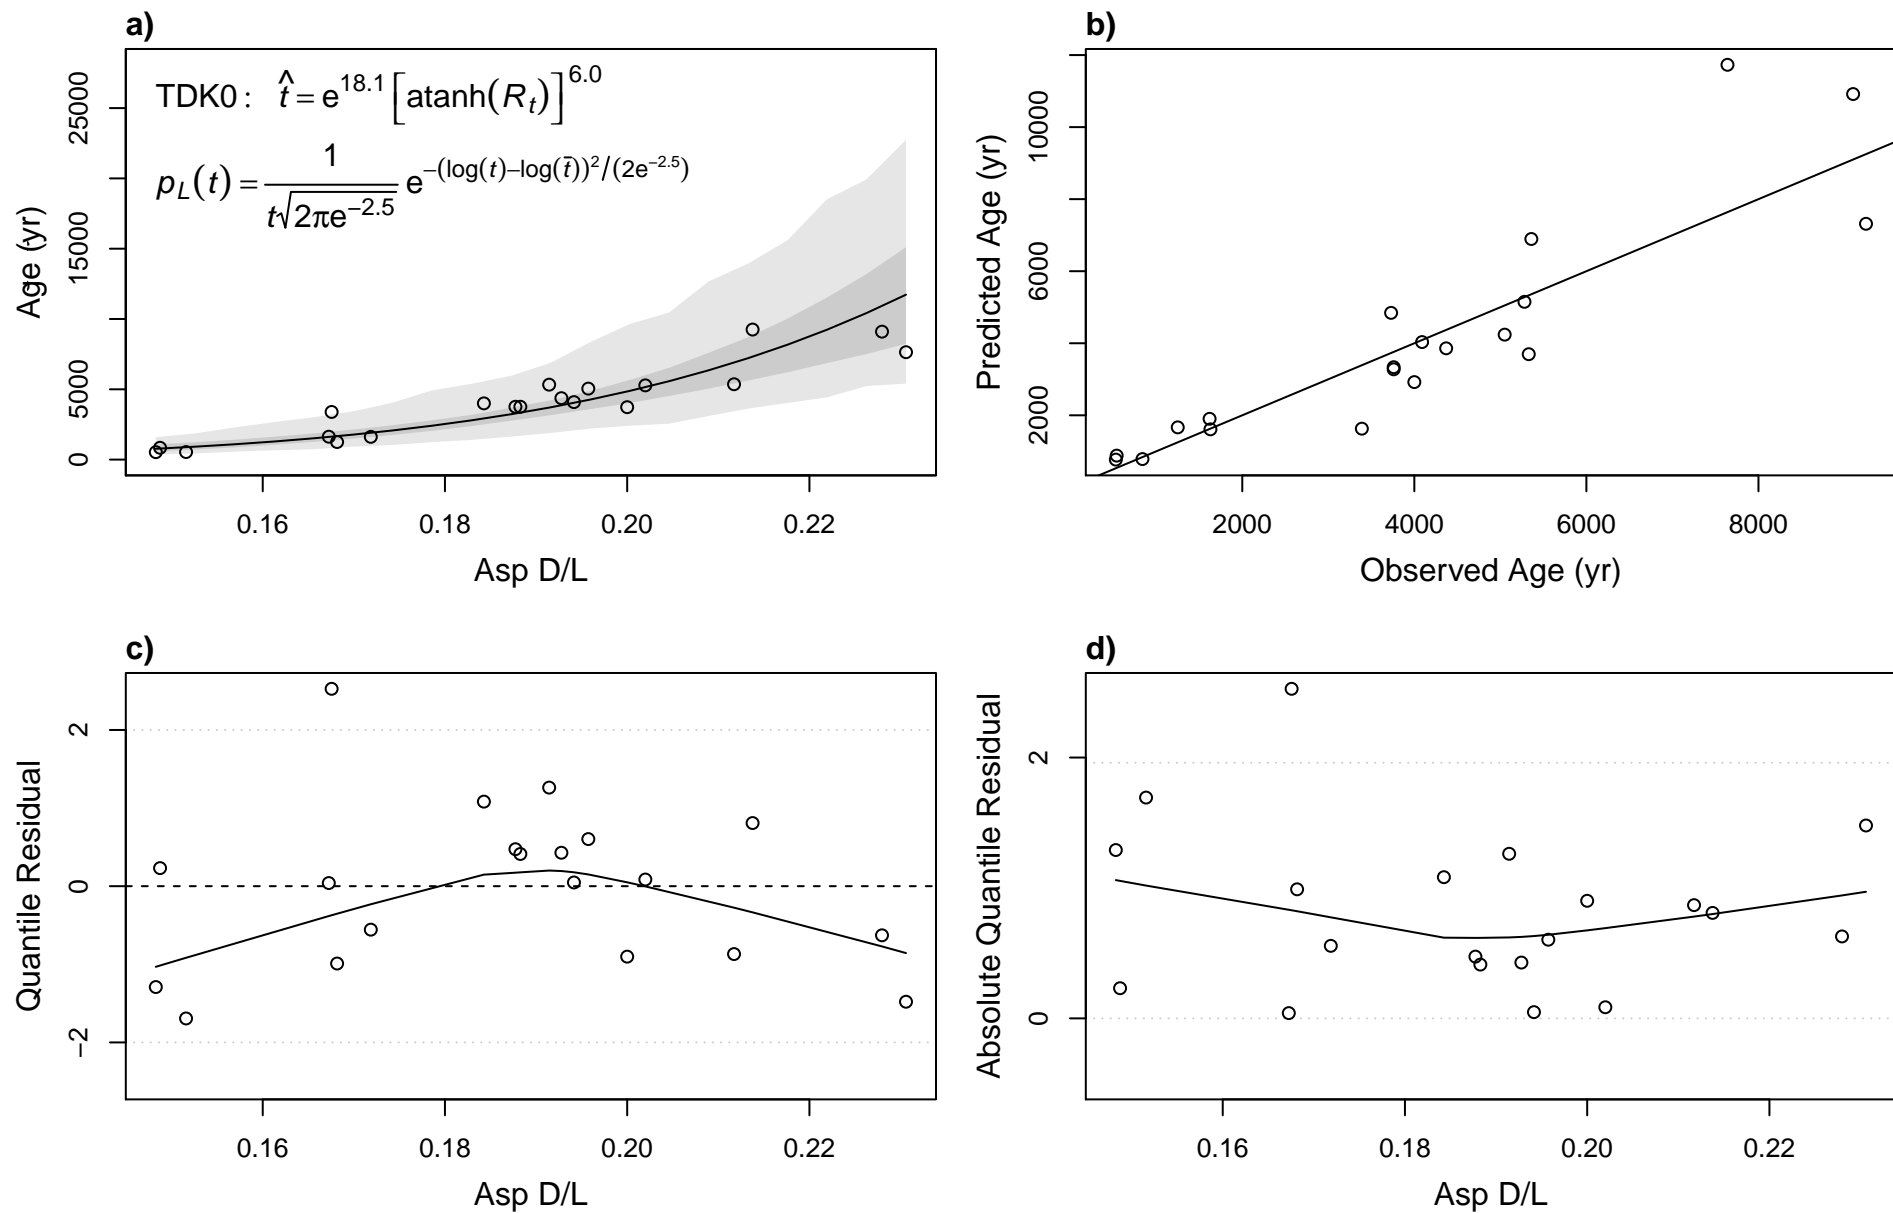



DR Figure 3. Continued: Model 9 (see DR Table 3); Taxon: Mya

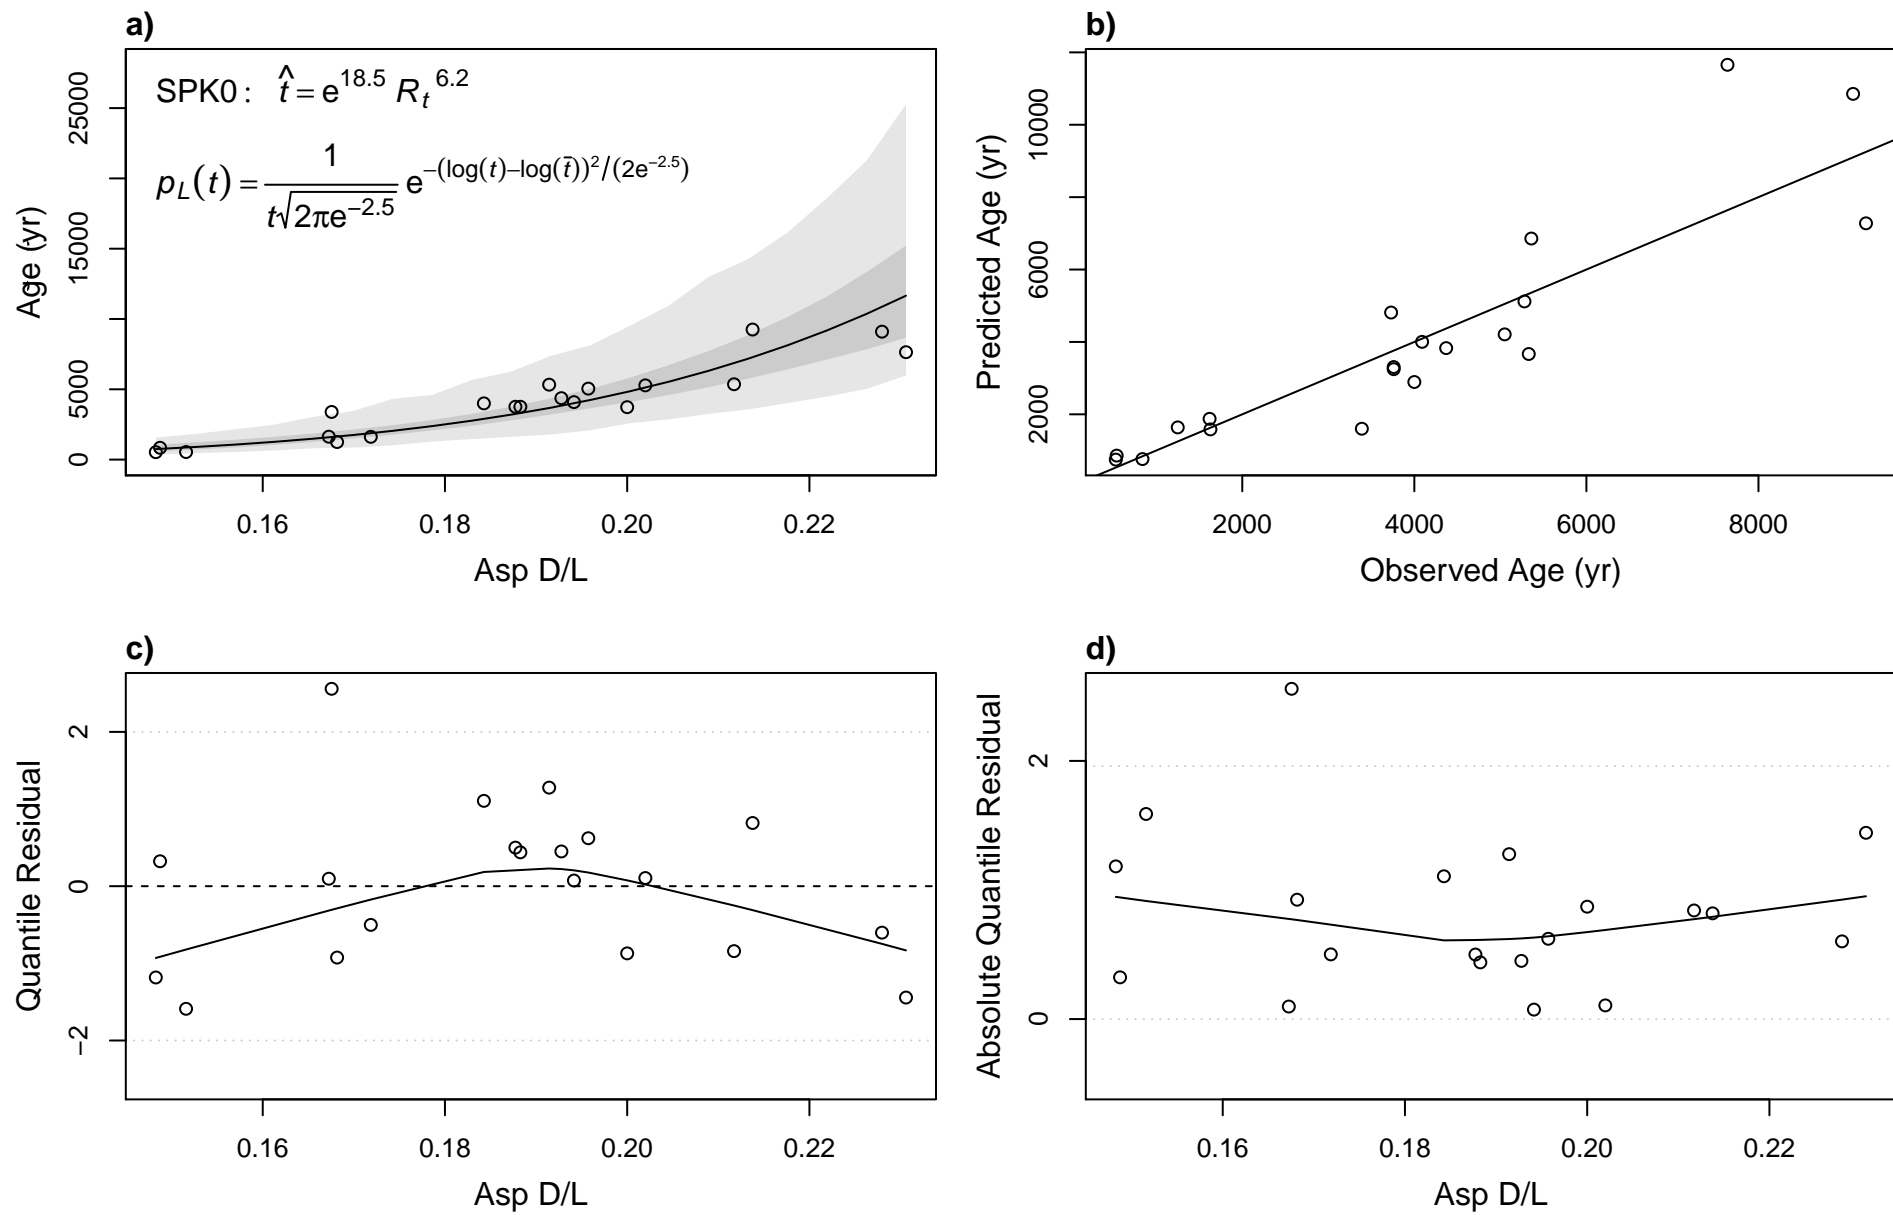

DR Figure 3. Continued: Model 10 (see DR Table 3); Taxon: Mya

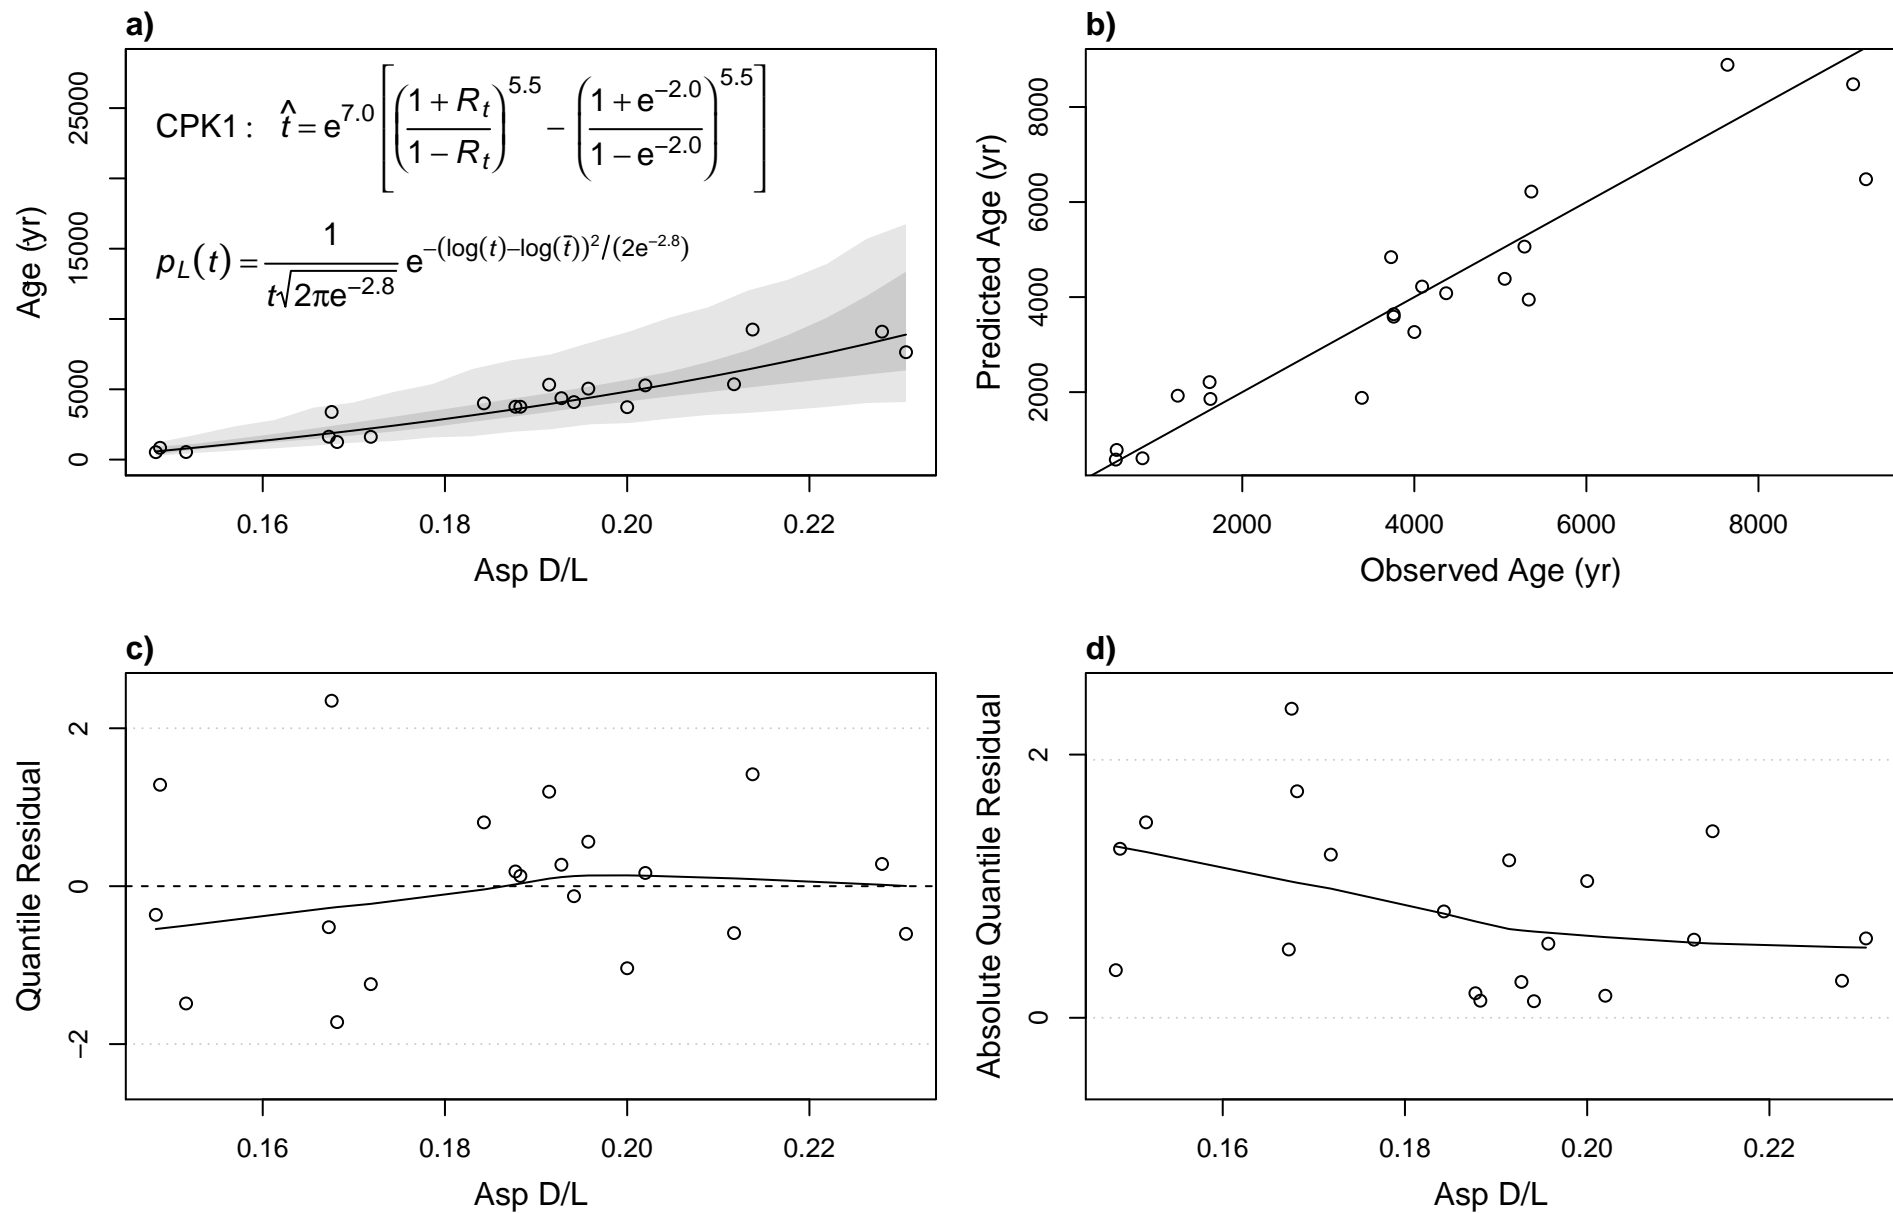

DR Figure 3. Continued: Model 11 (see DR Table 3); Taxon: Mya

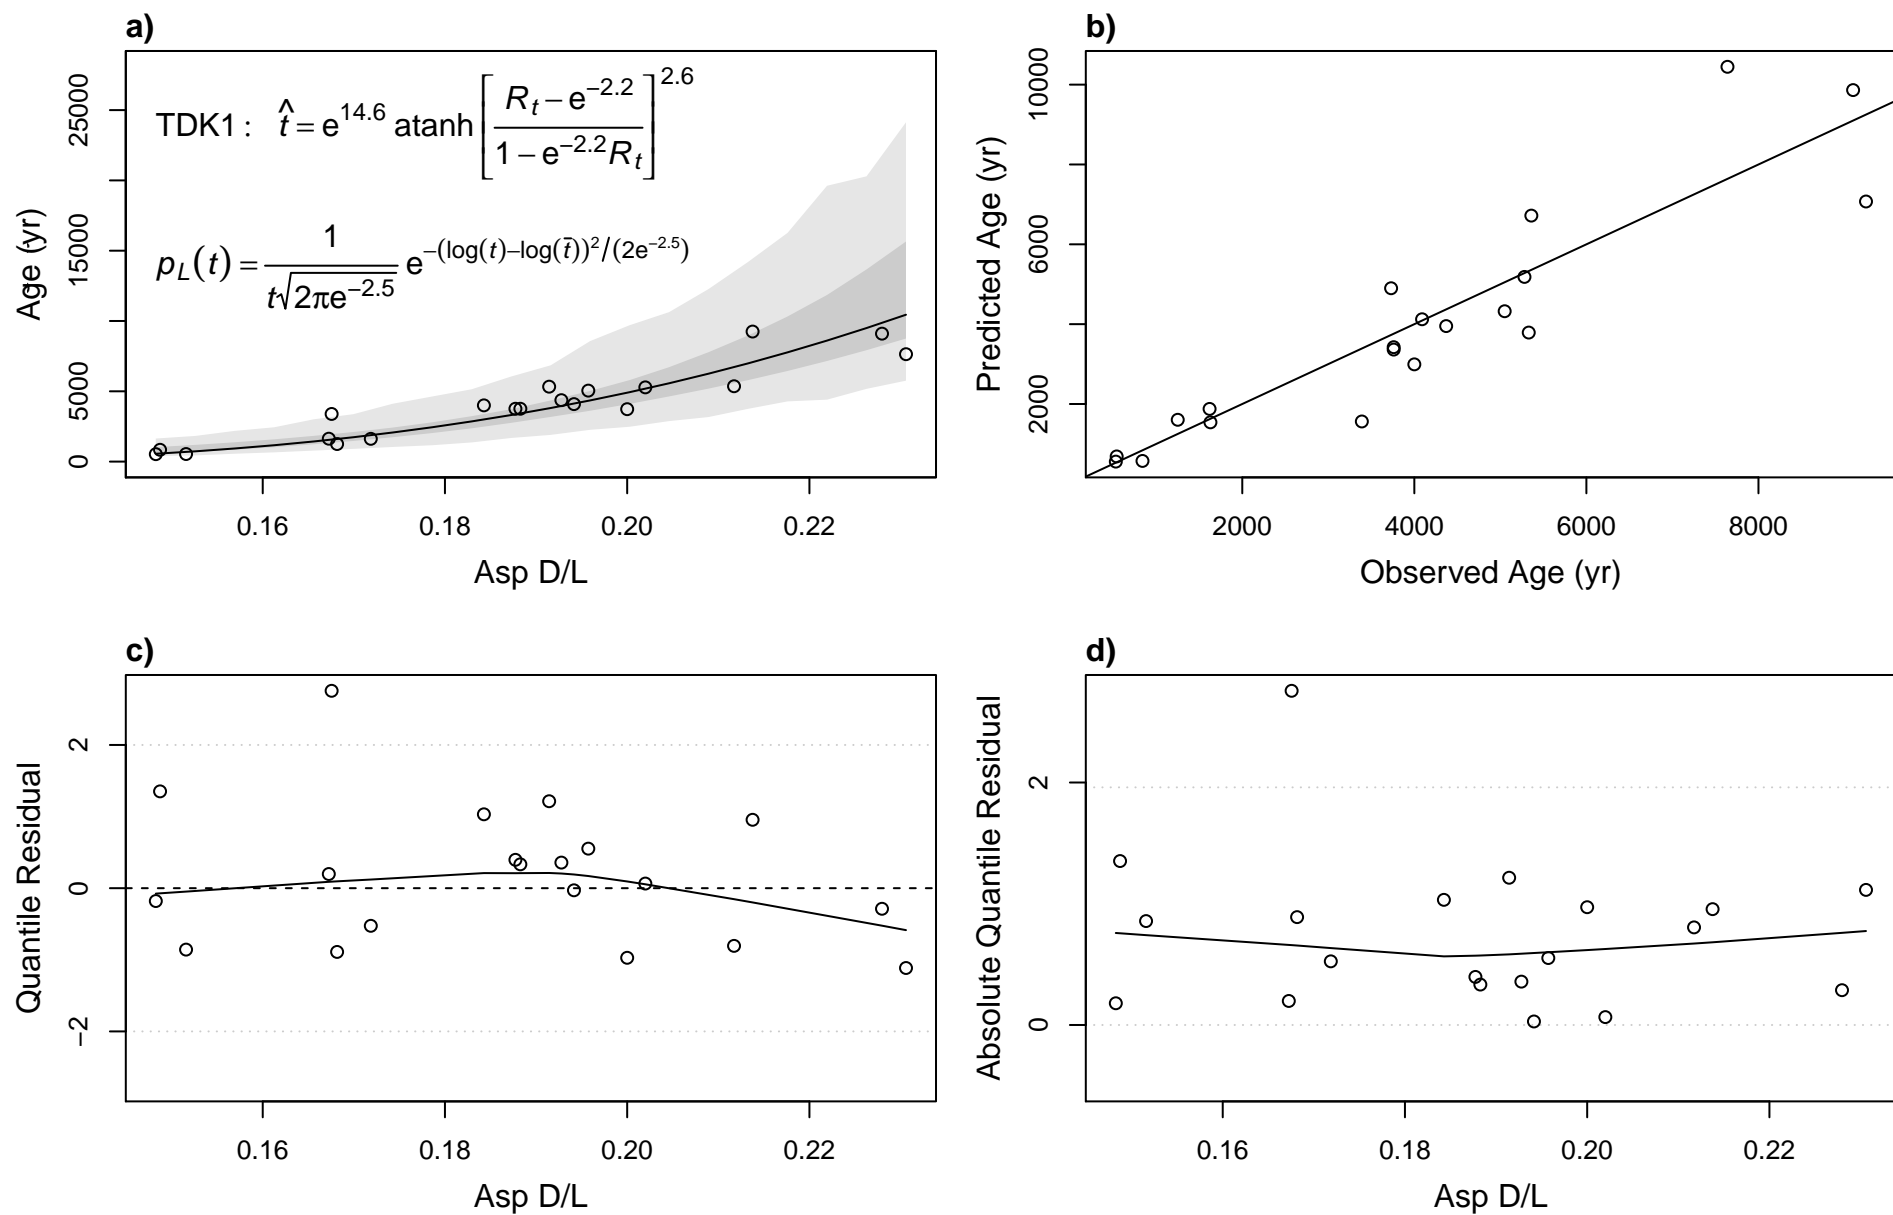

DR Figure 3. Continued: Model 12 (see DR Table 3); Taxon: Mya

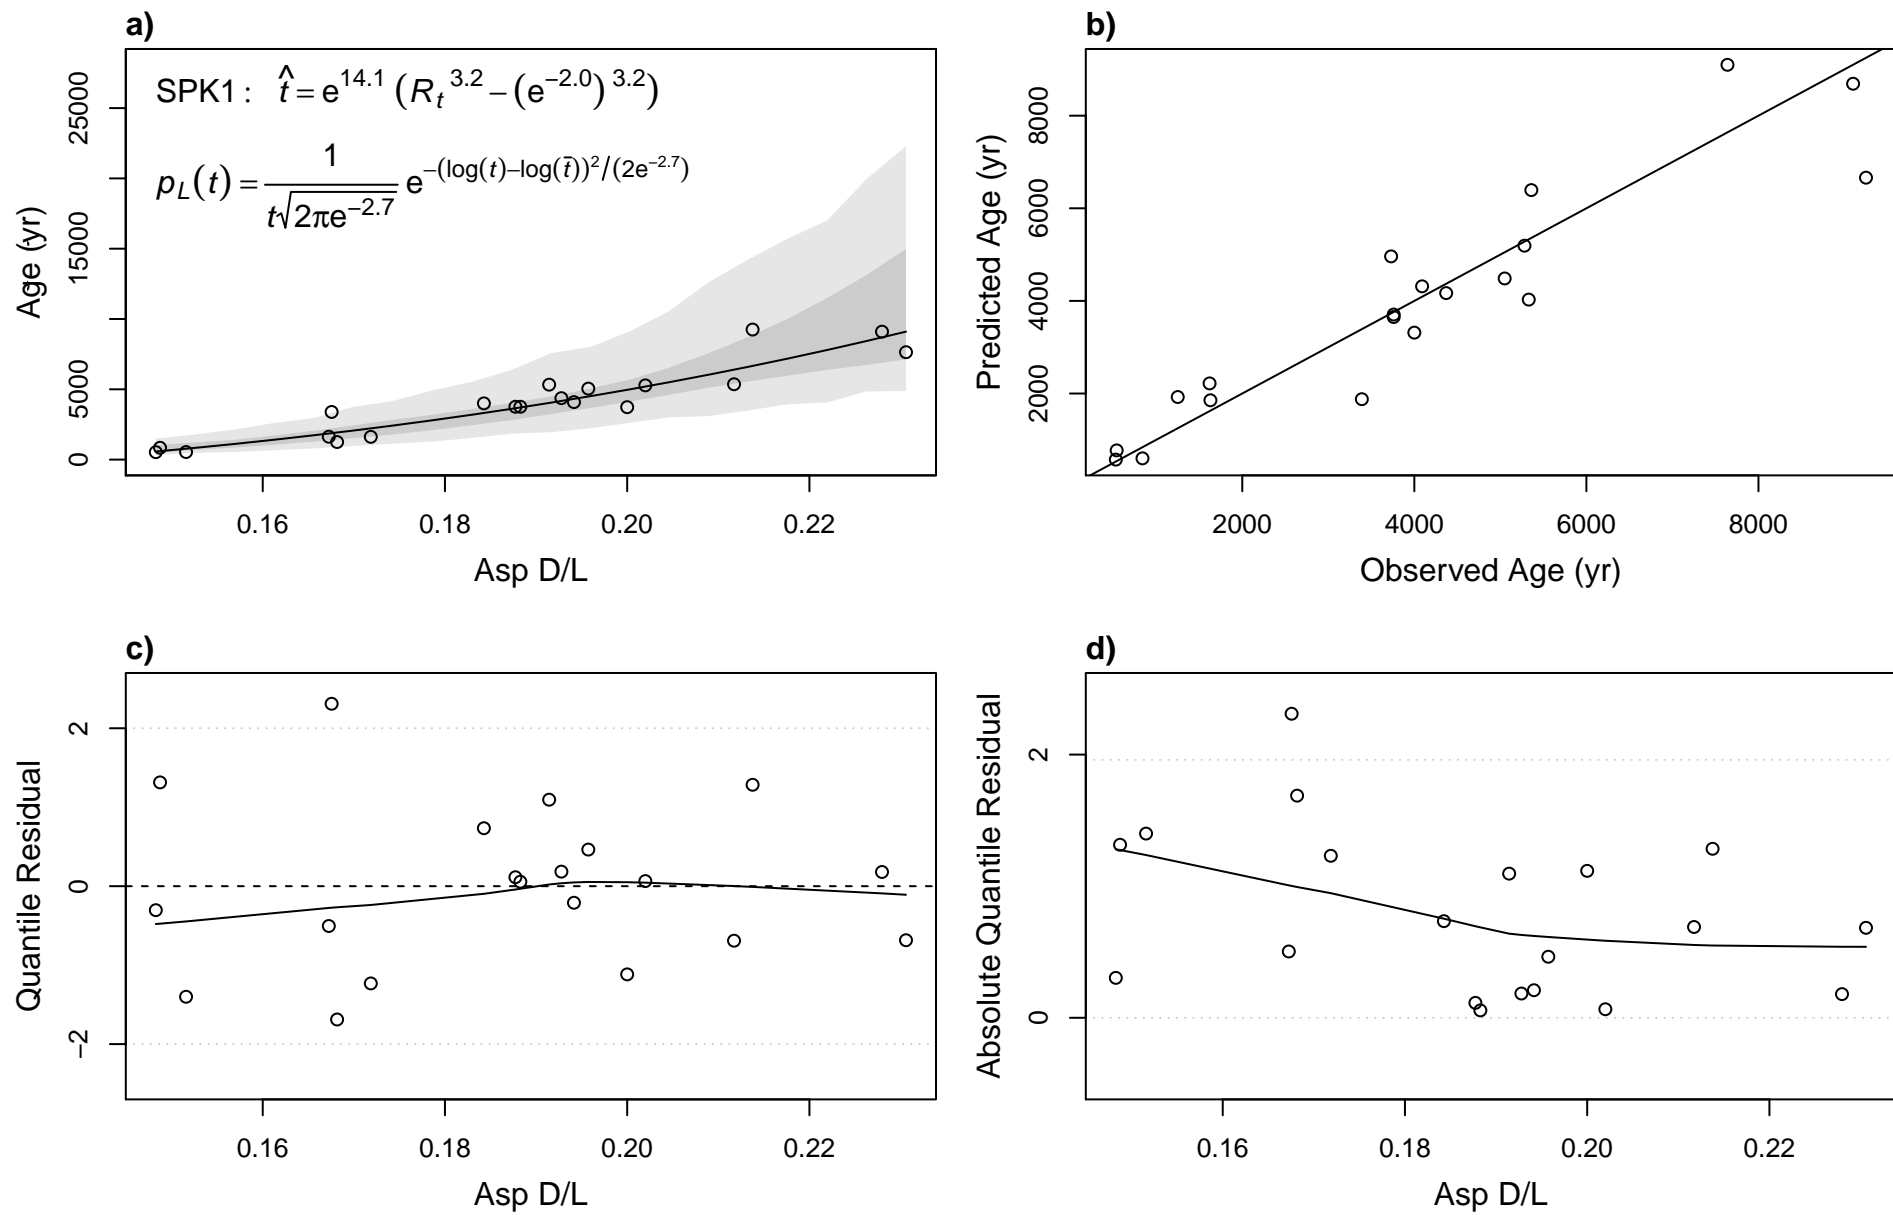

DR Figure 3. Continued: Model 13 (see DR Table 3); Taxon: Mya

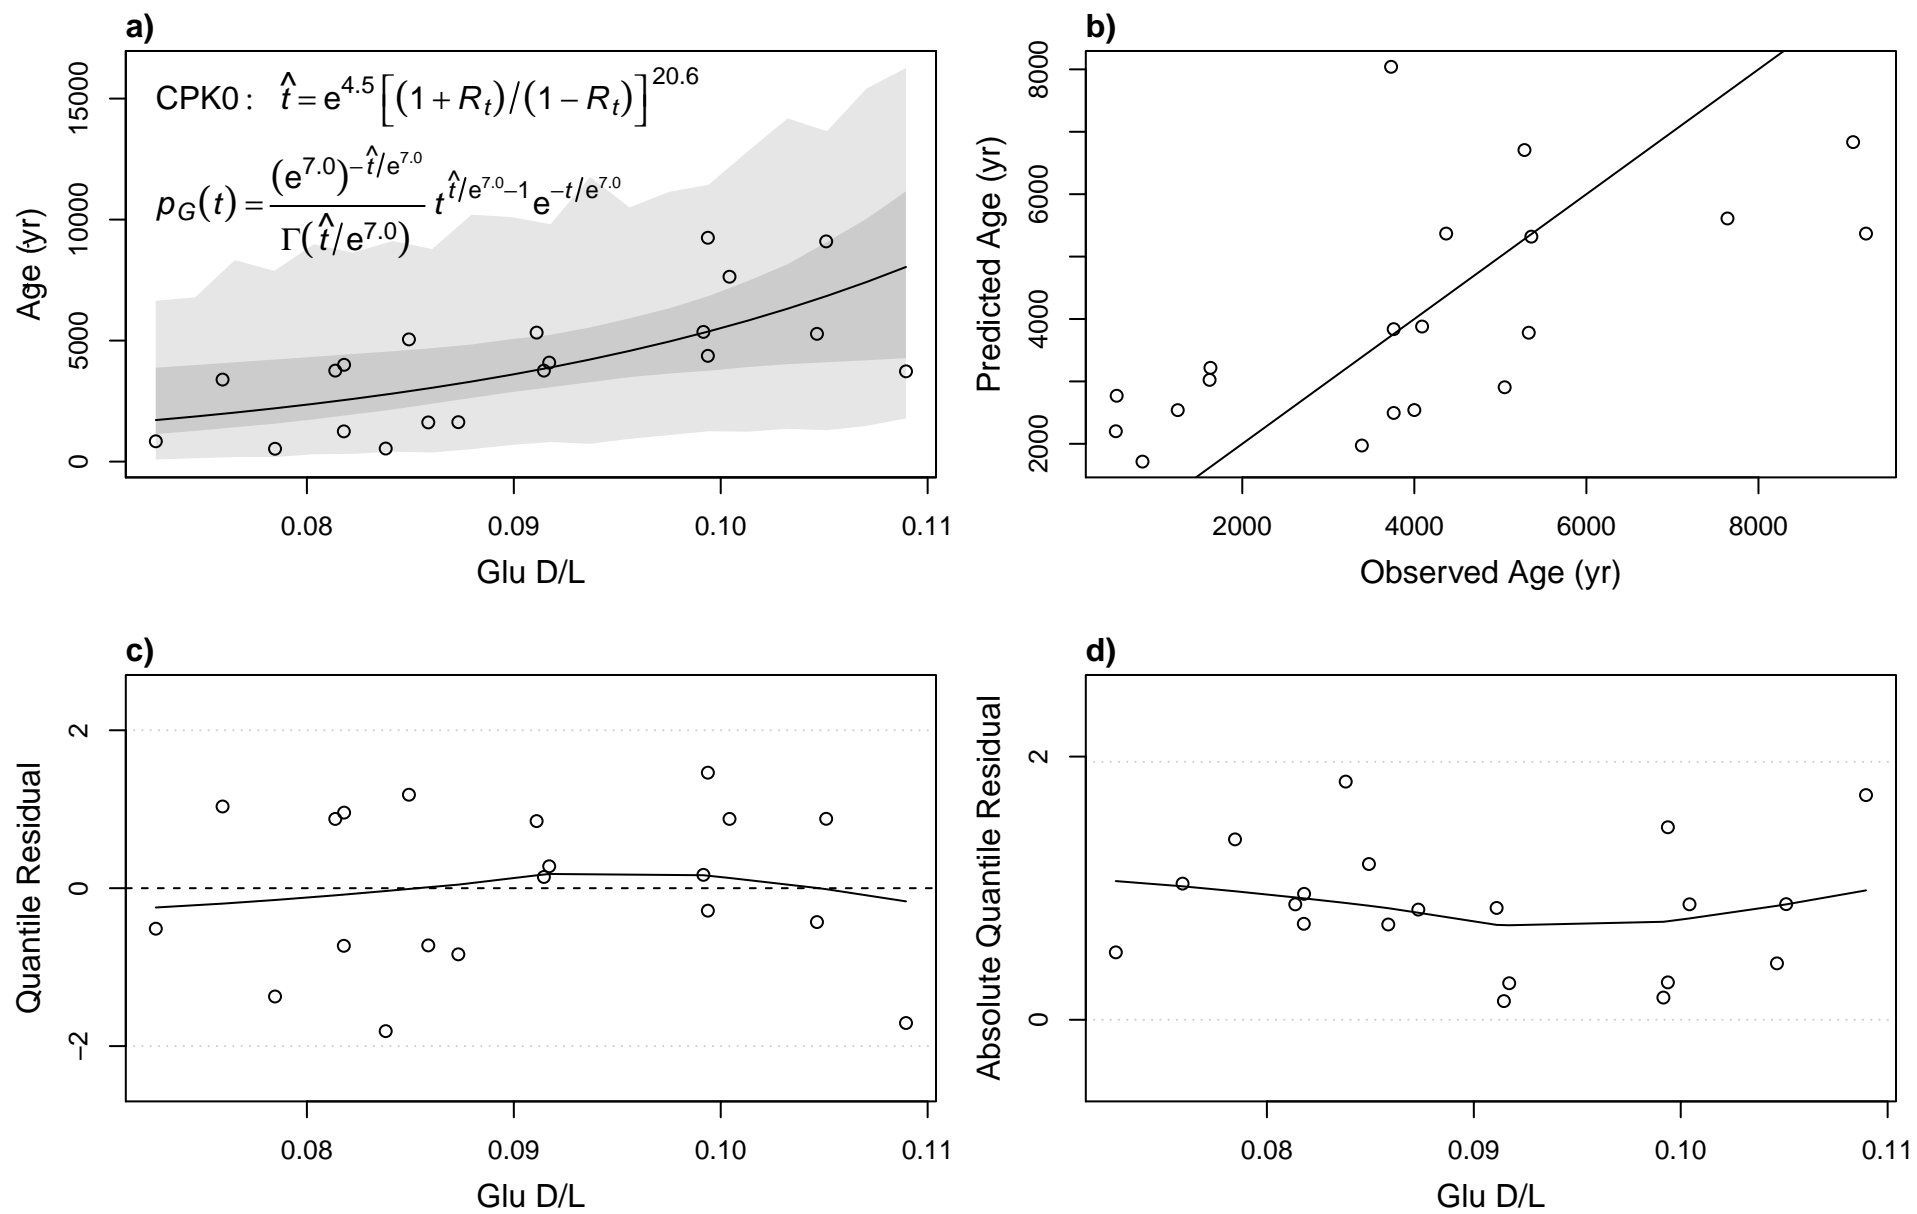

DR Figure 3. Continued: Model 14 (see DR Table 3); Taxon: Mya

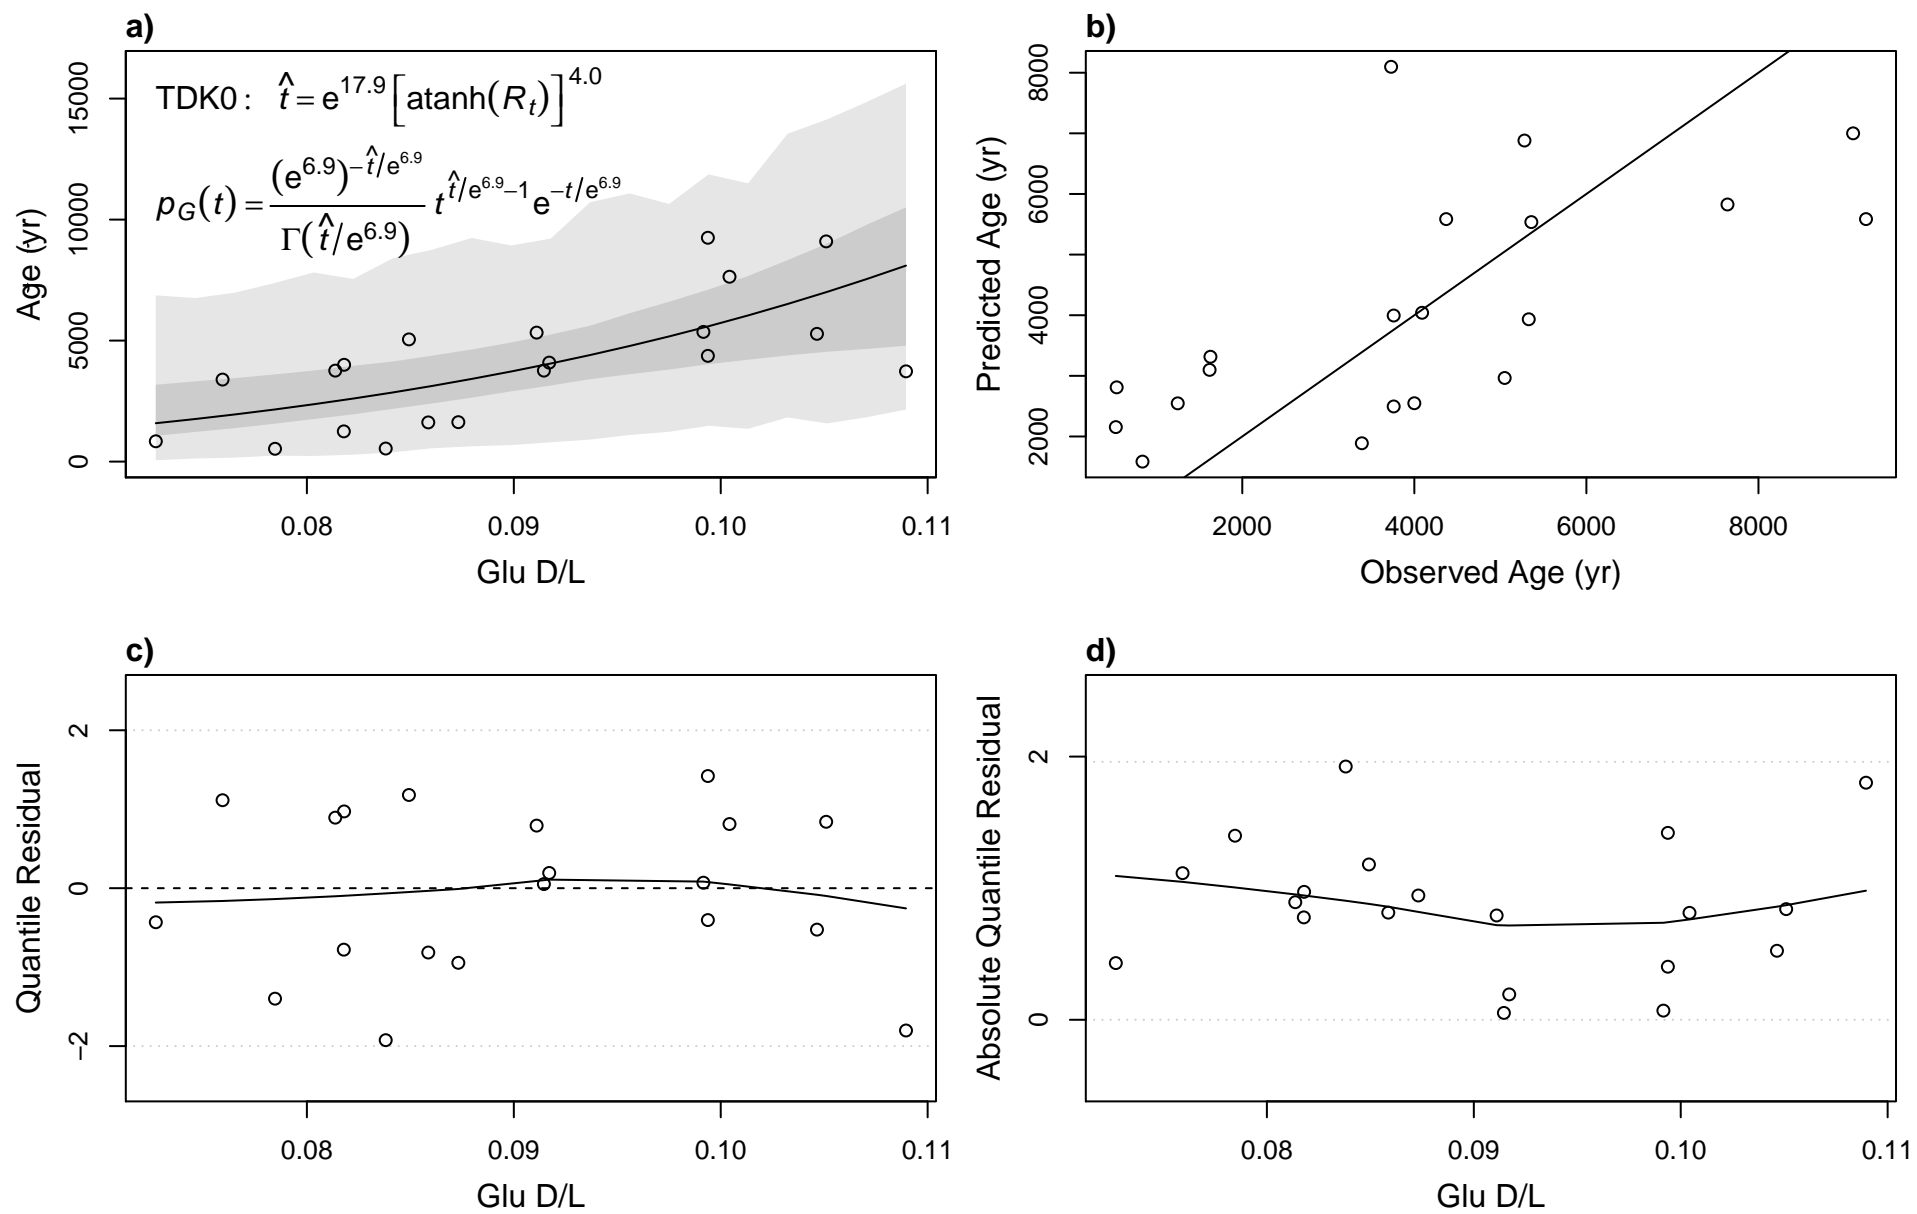

DR Figure 3. Continued: Model 15 (see DR Table 3); Taxon: Mya

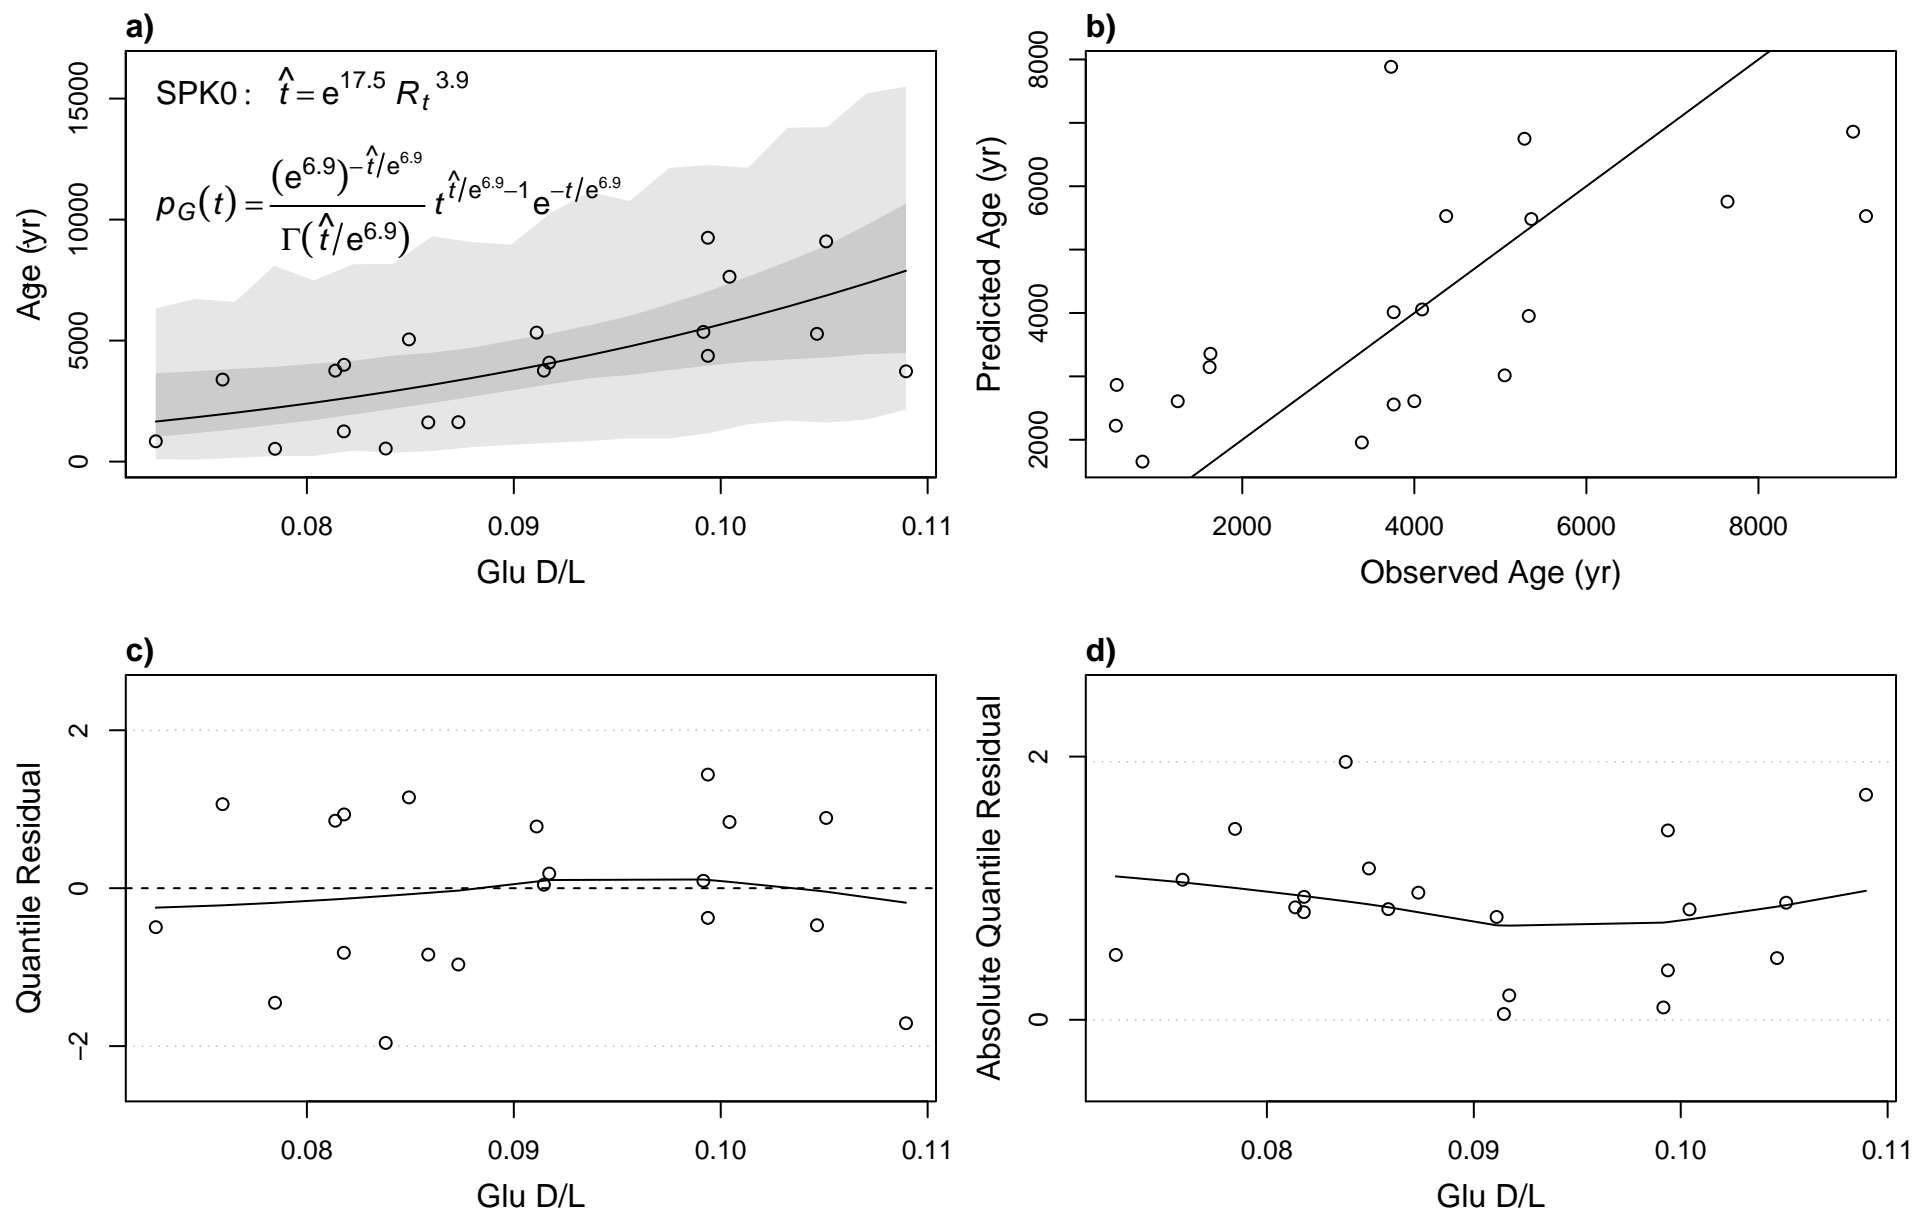

DR Figure 3. Continued: Model 16 (see DR Table 3); Taxon: Mya

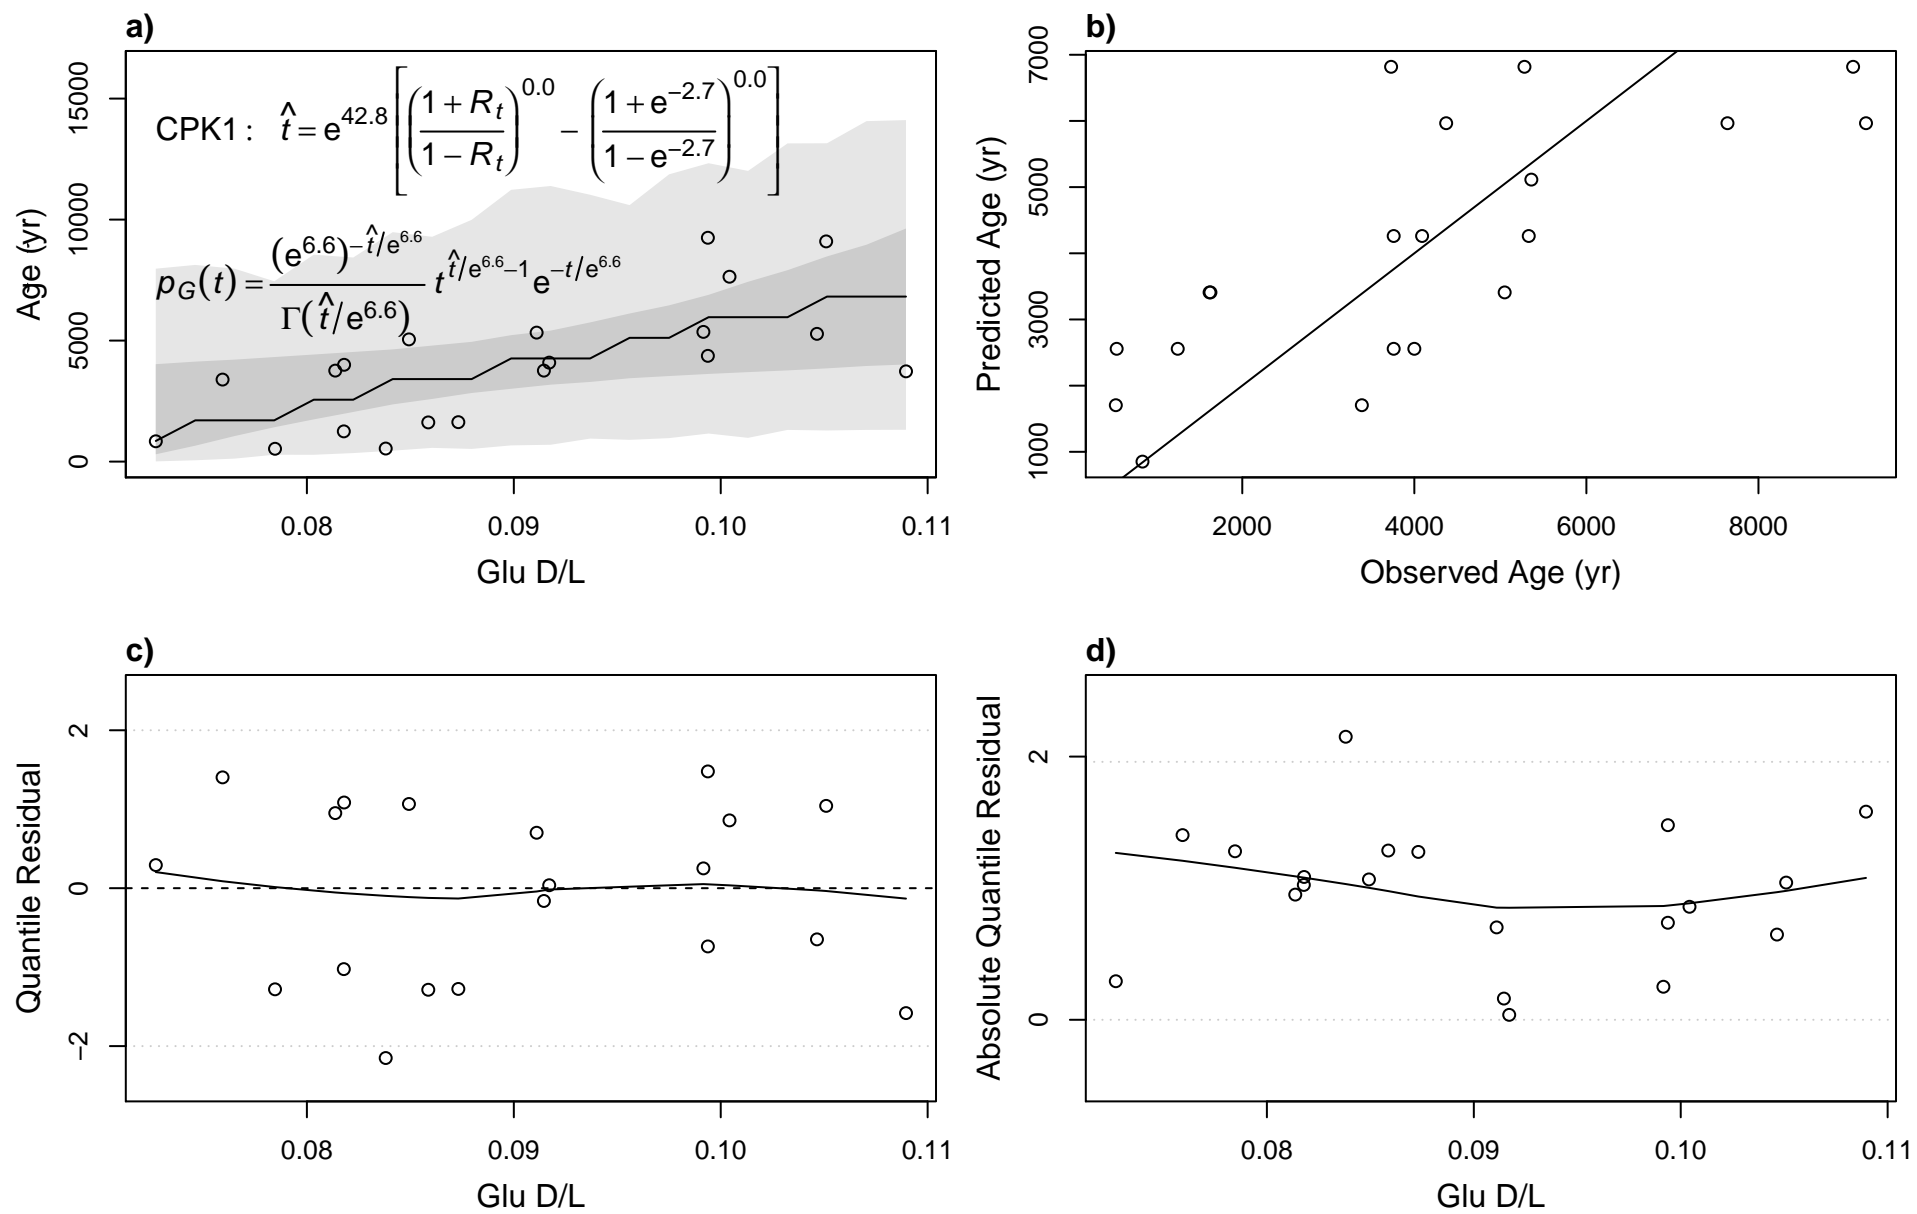



DR Figure 3. Continued: Model 17 (see DR Table 3); Taxon: Mya

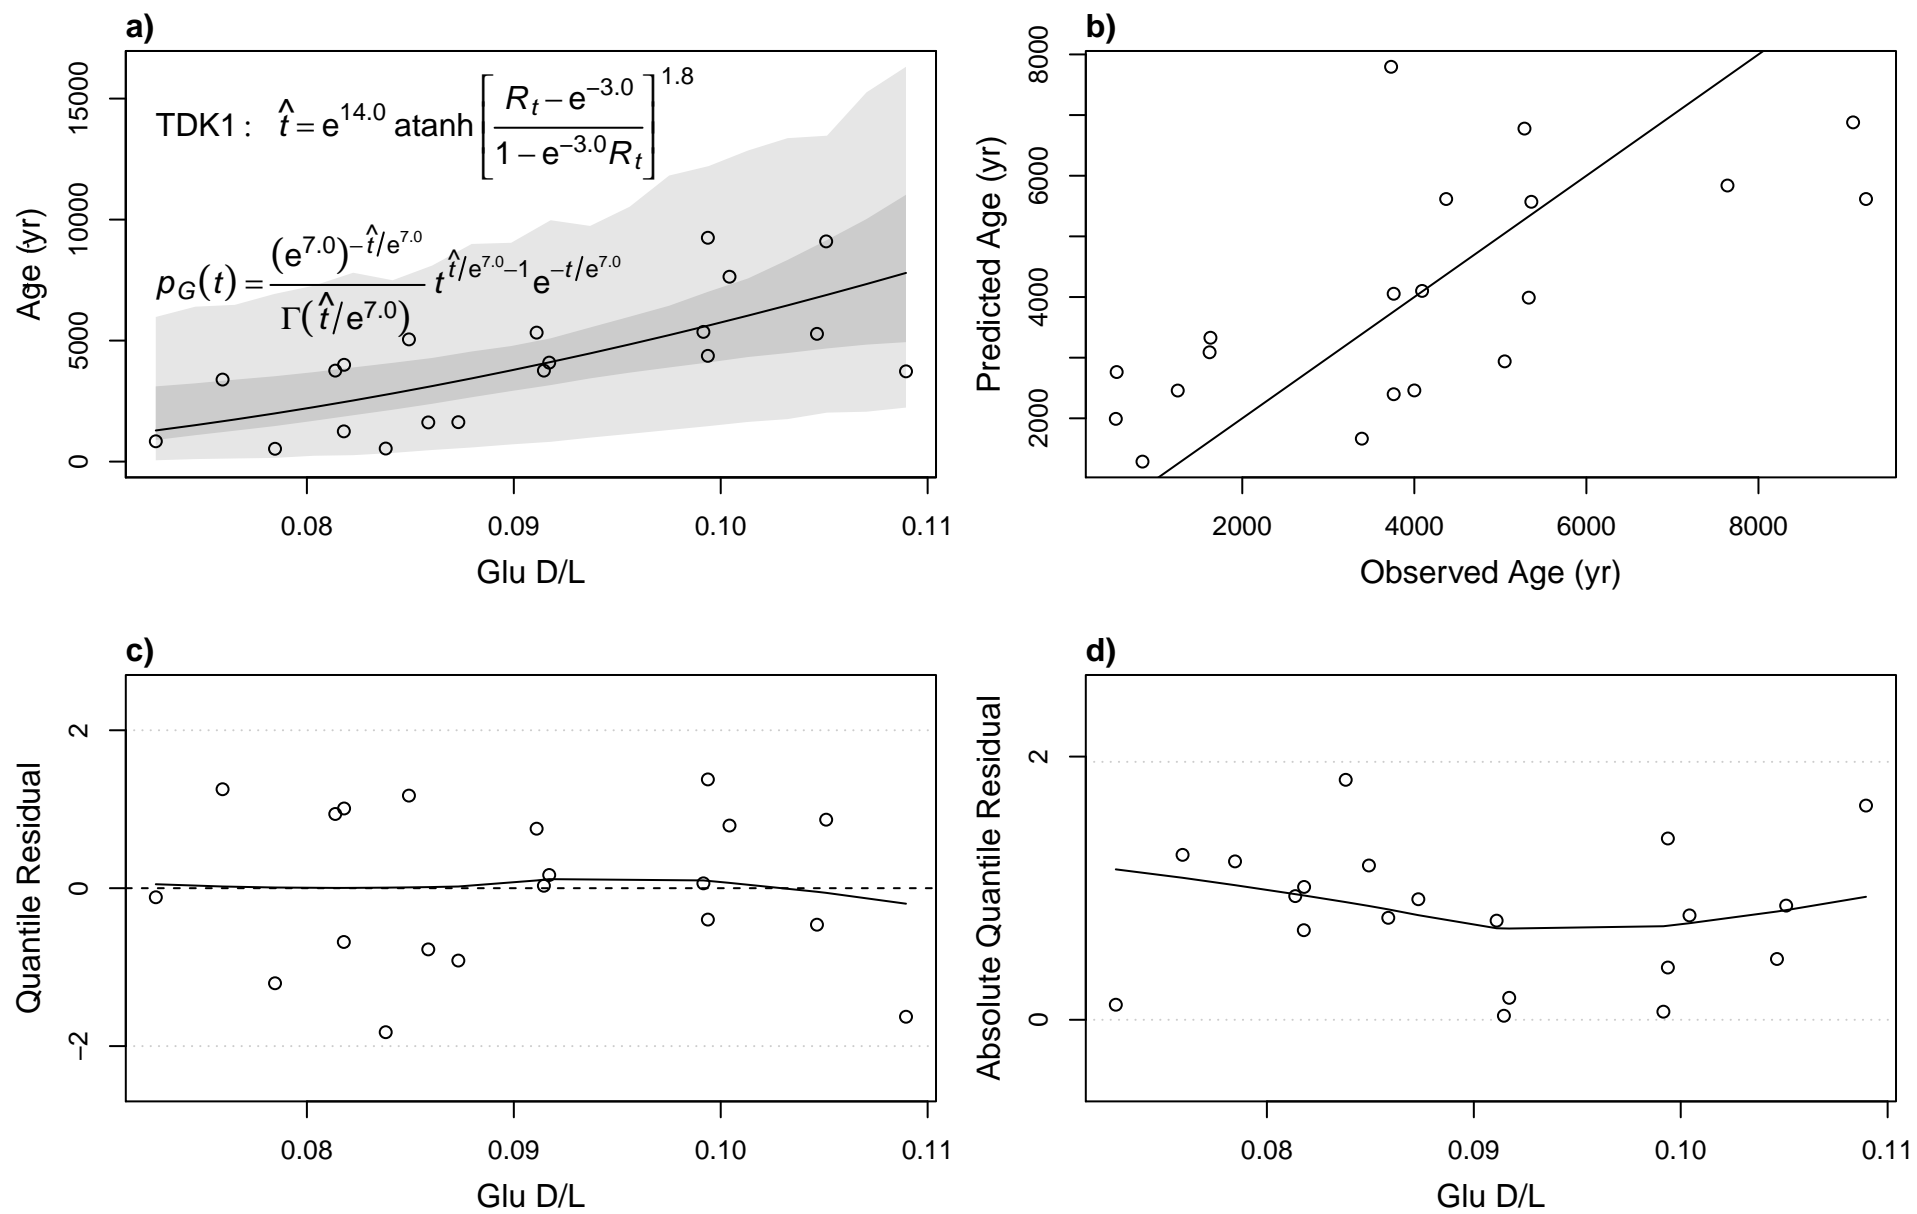

DR Figure 3. Continued: Model 18 (see DR Table 3); Taxon: Mya

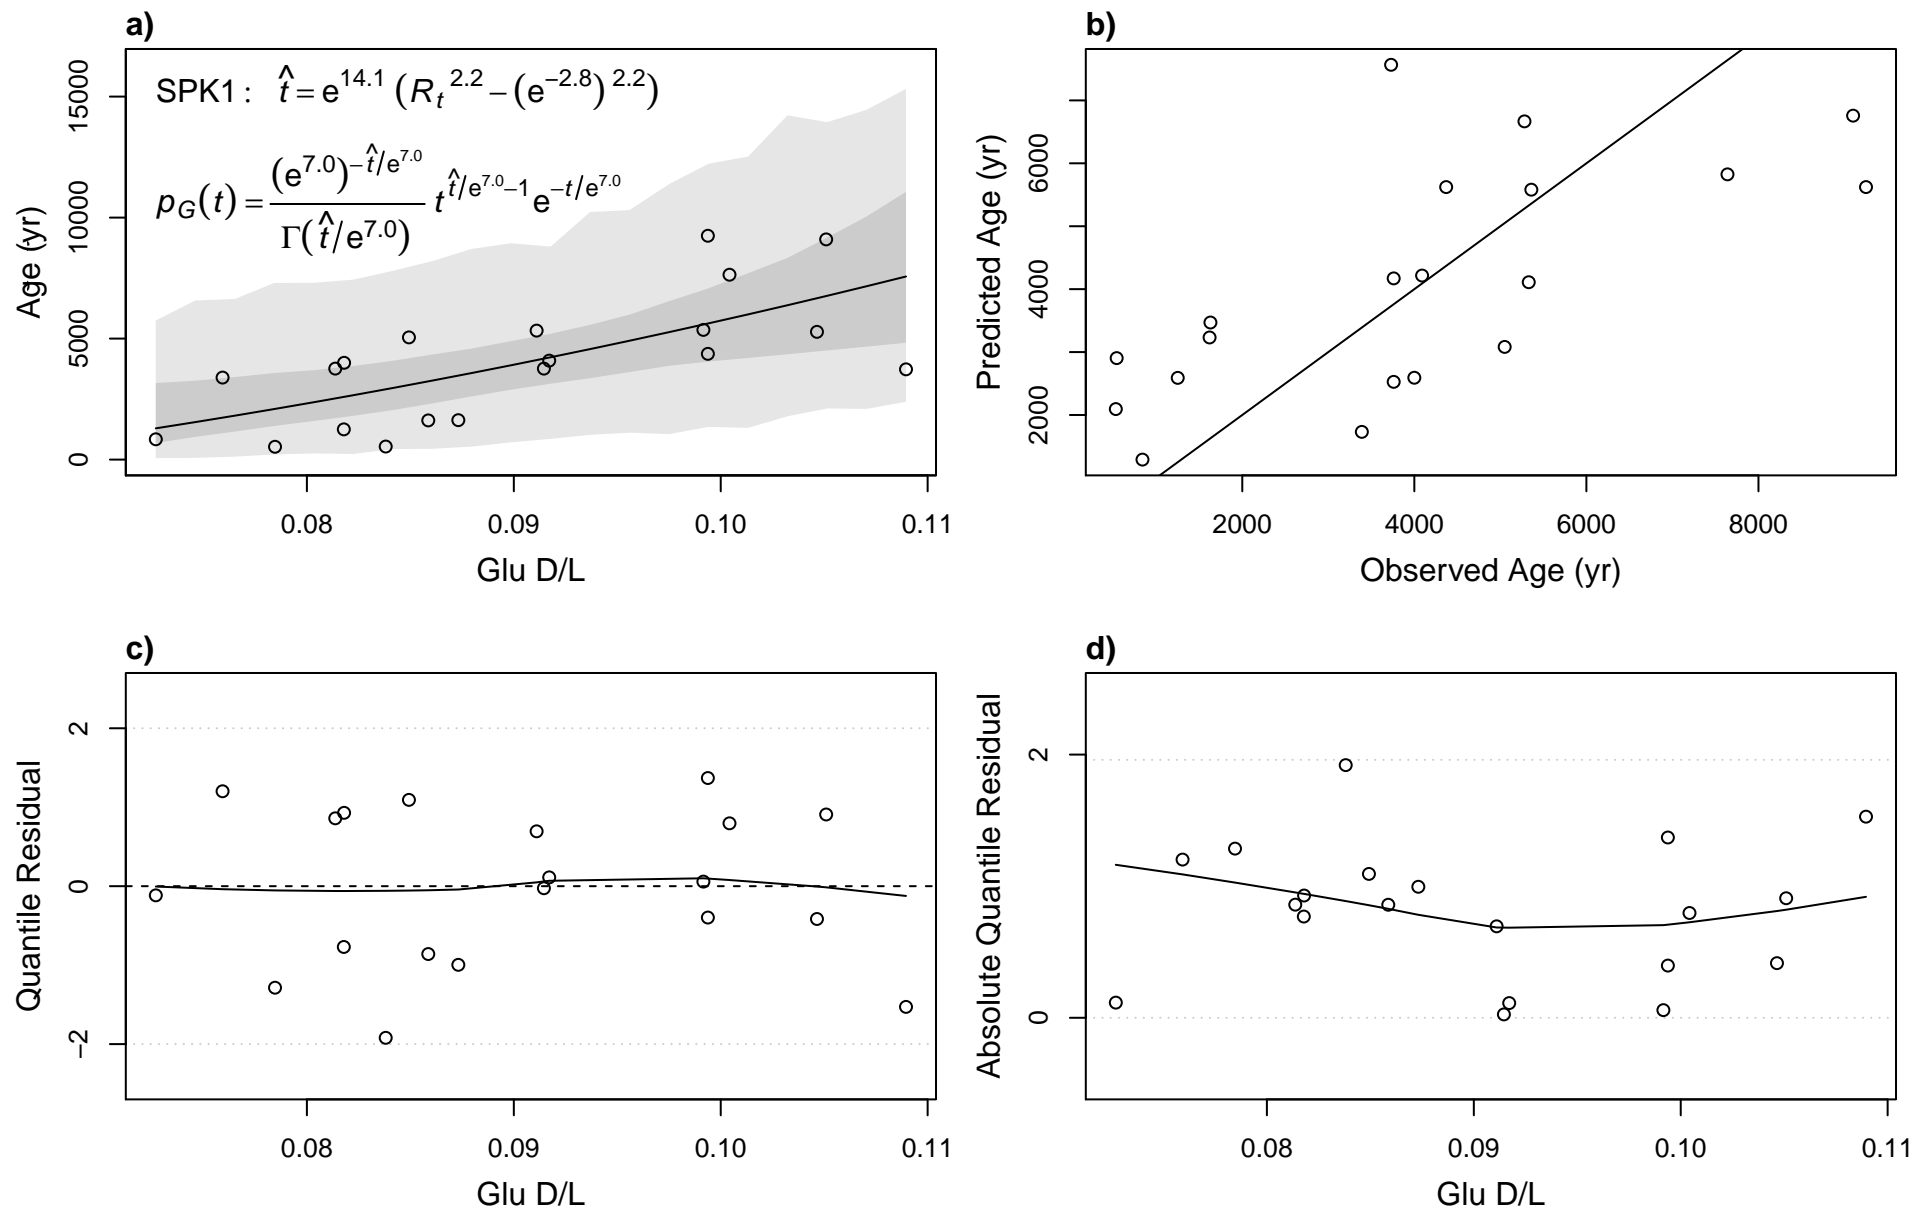

DR Figure 3. Continued: Model 19 (see DR Table 3); Taxon: Mya

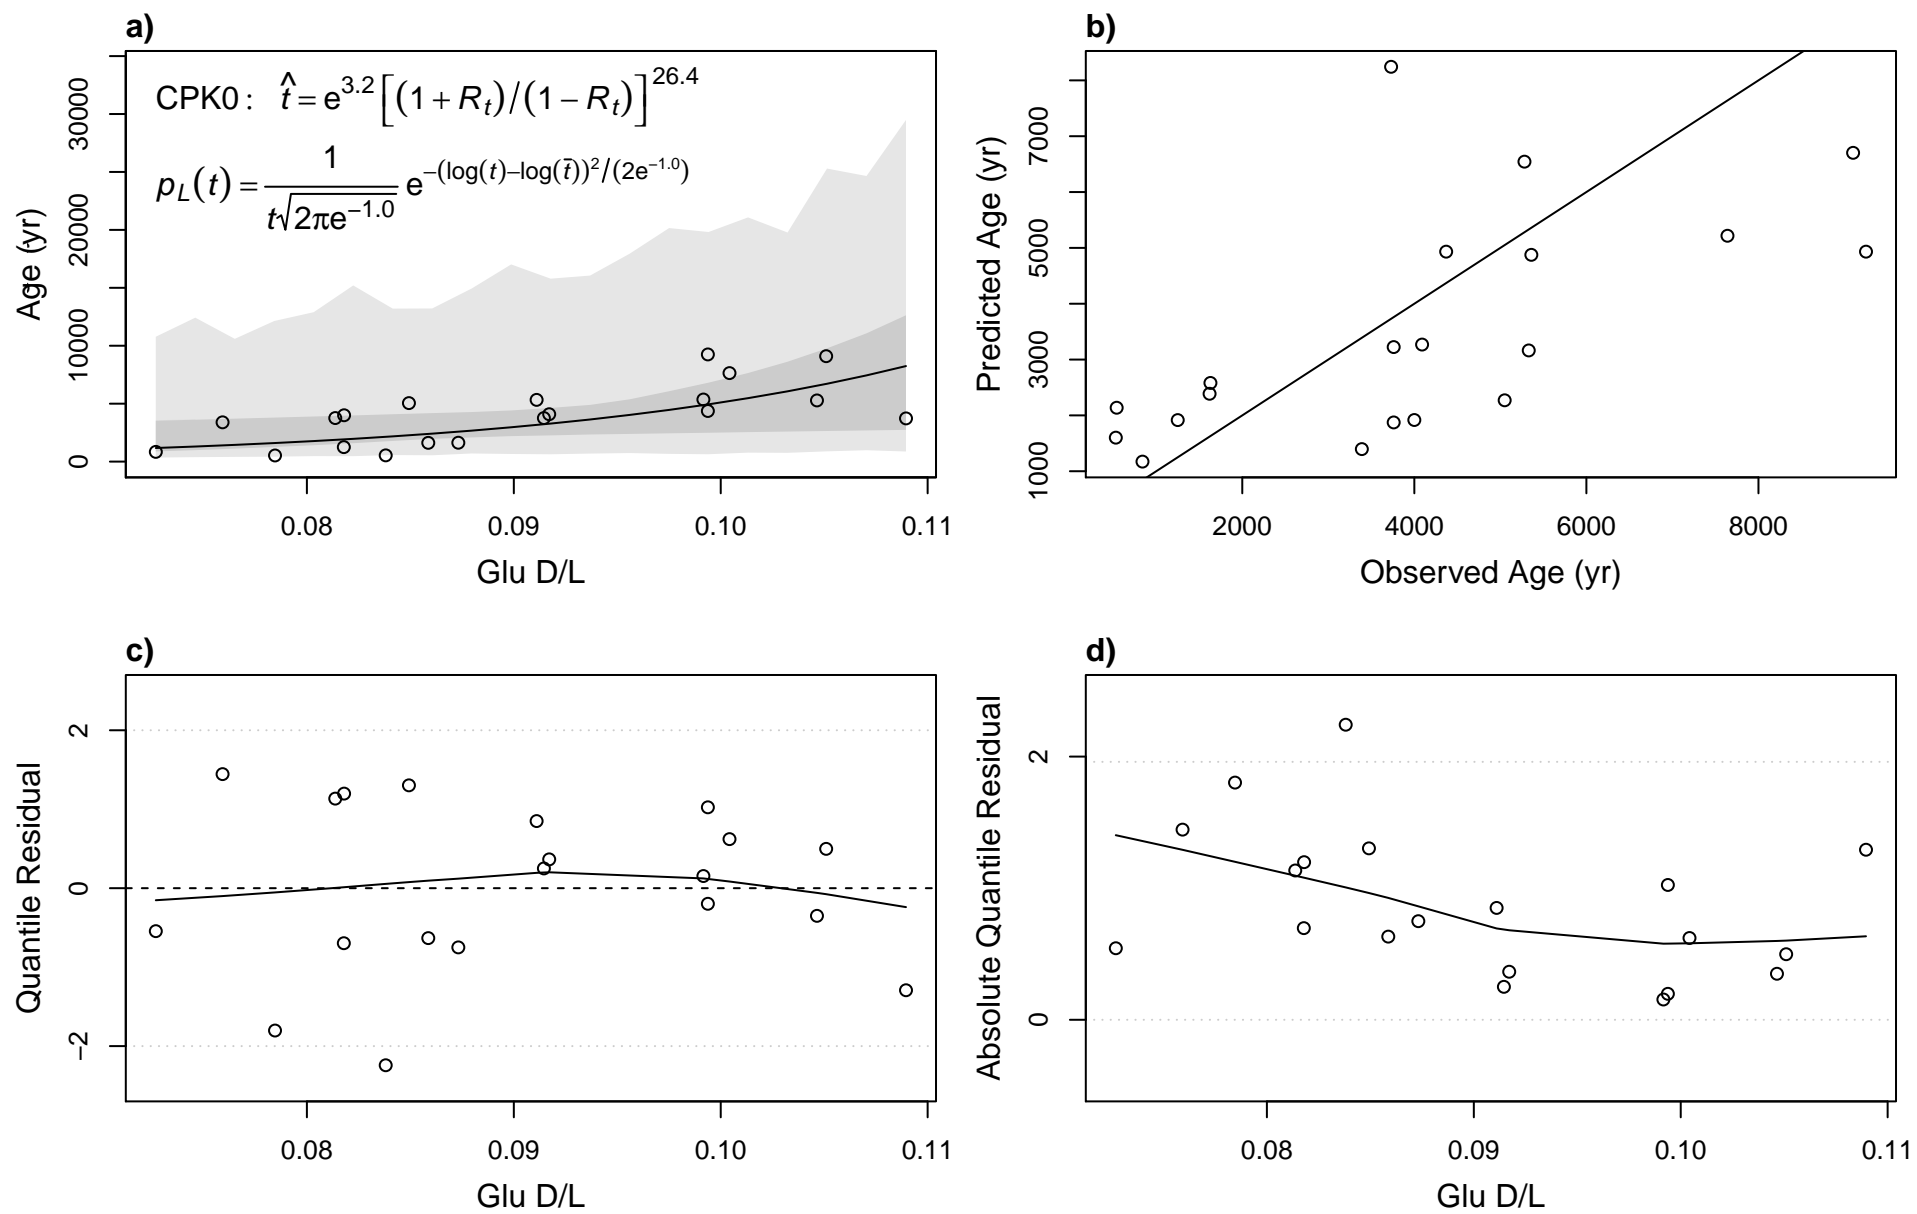

DR Figure 3. Continued: Model 20 (see DR Table 3); Taxon: Mya

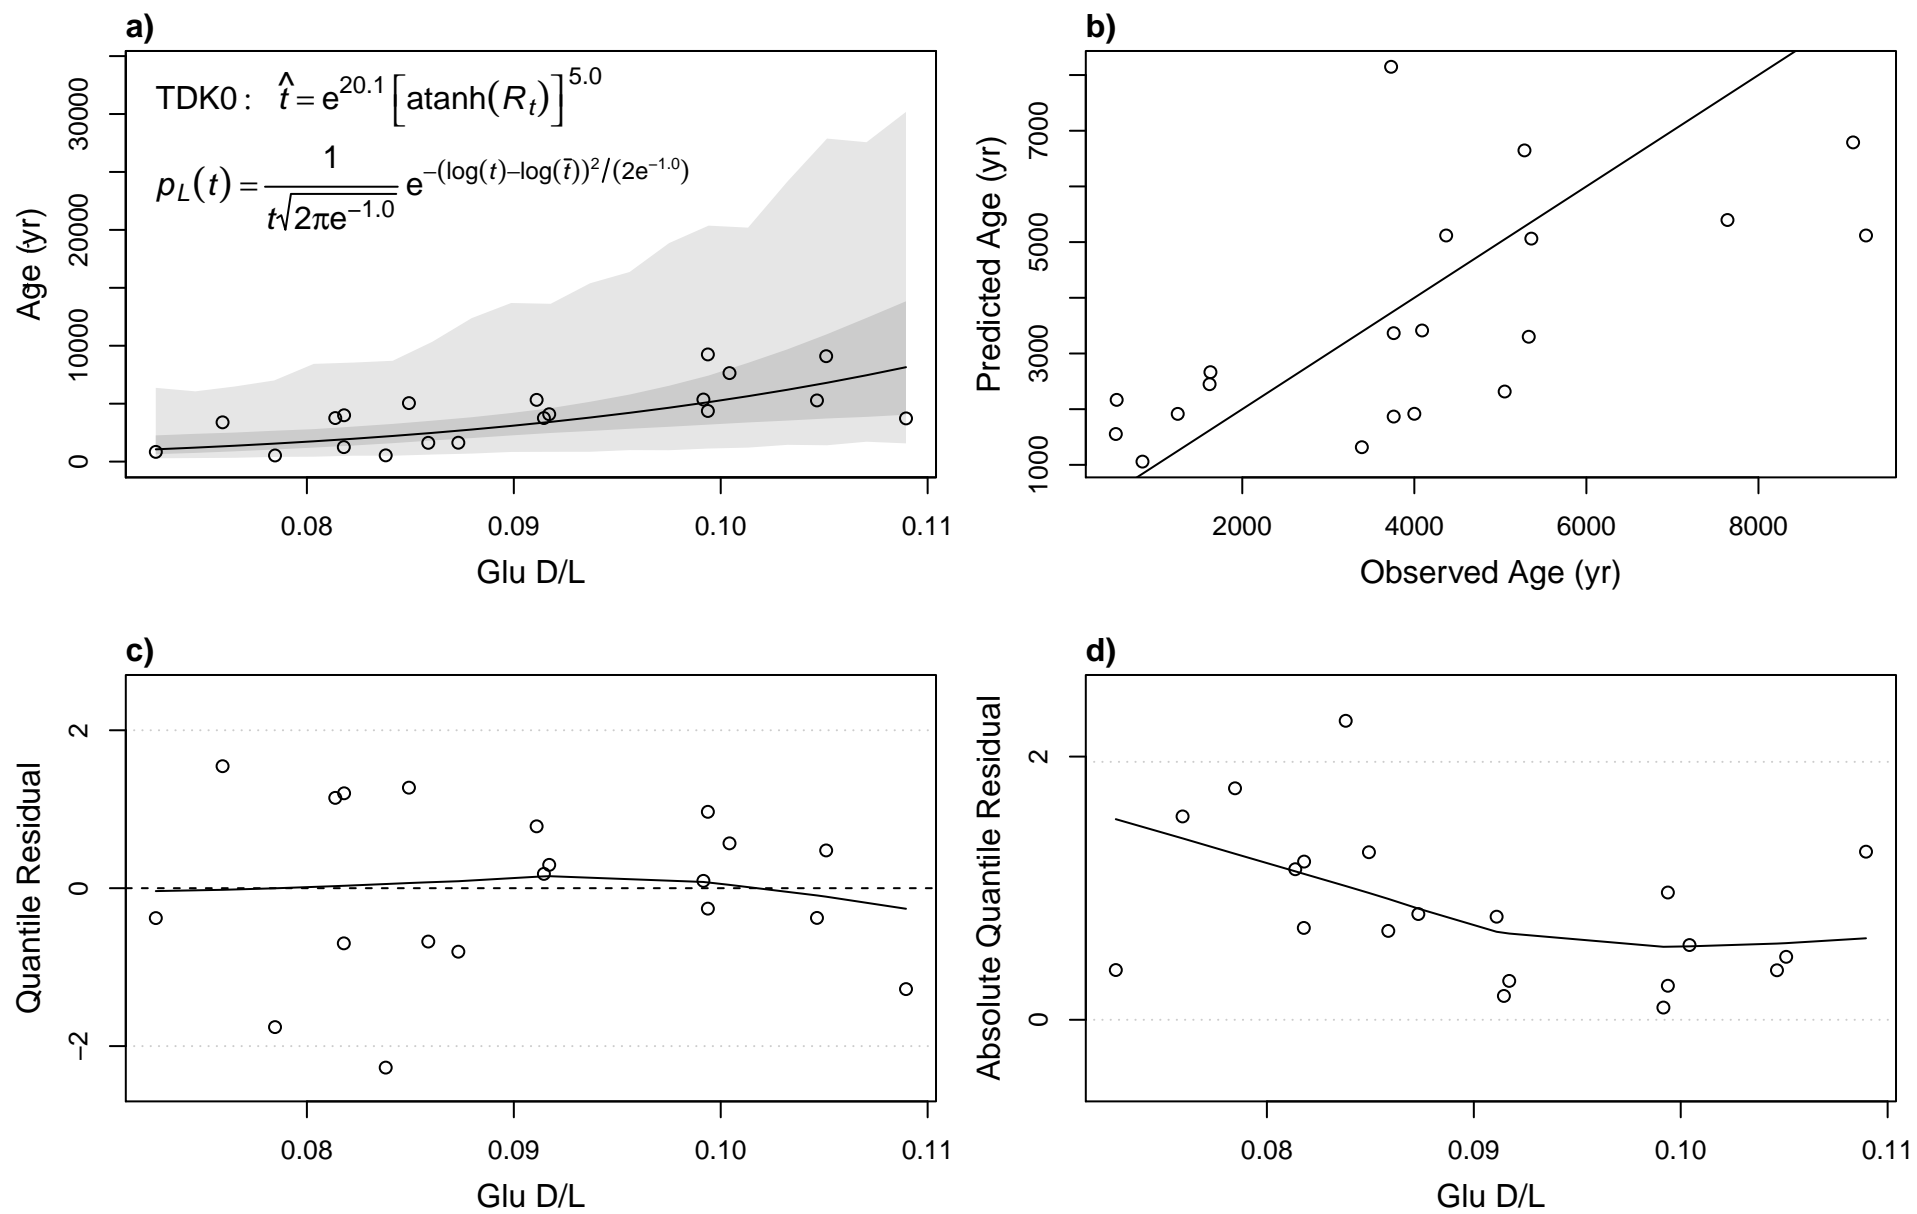

DR Figure 3. Continued: Model 21 (see DR Table 3); Taxon: Mya

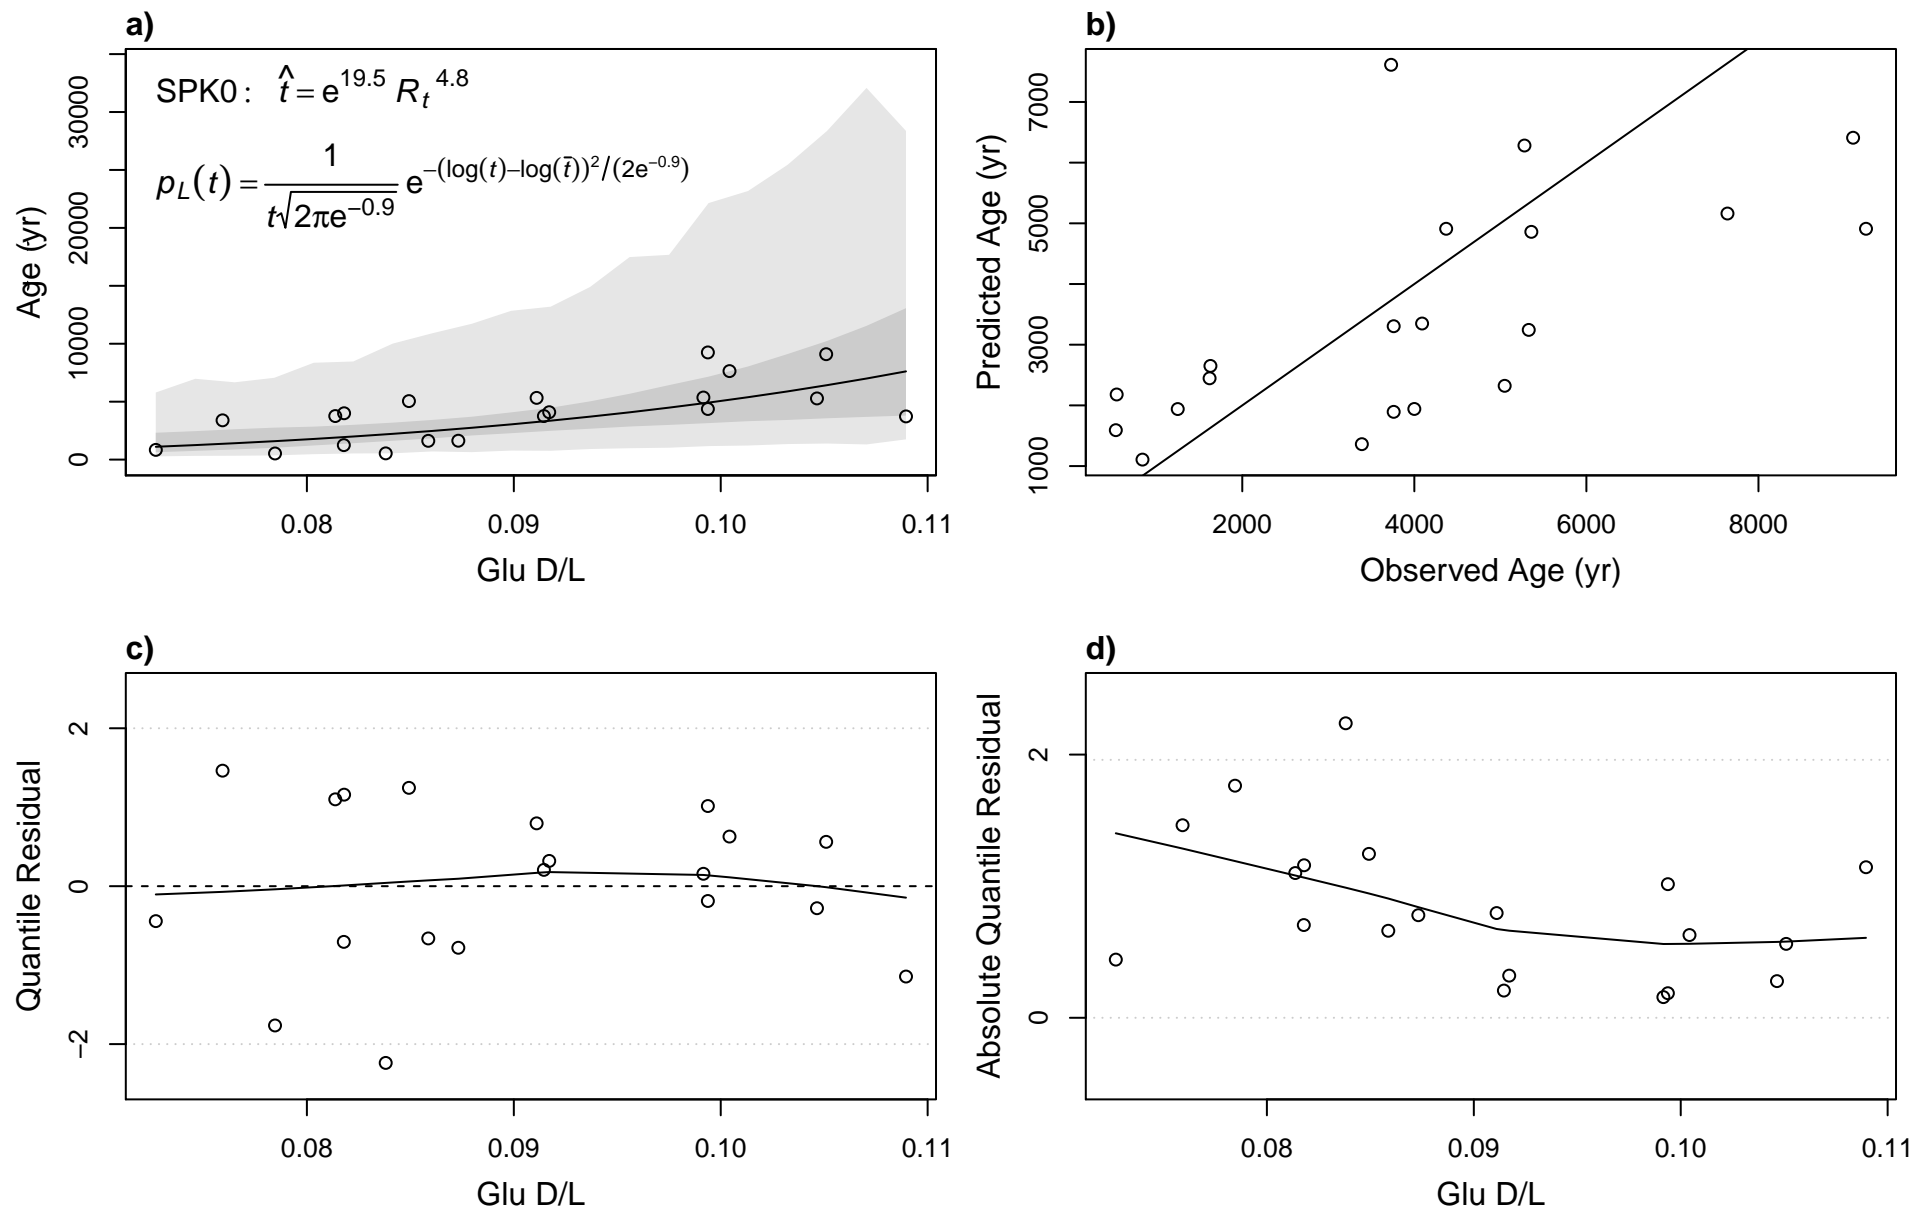

DR Figure 3. Continued: Model 22 (see DR Table 3); Taxon: Mya

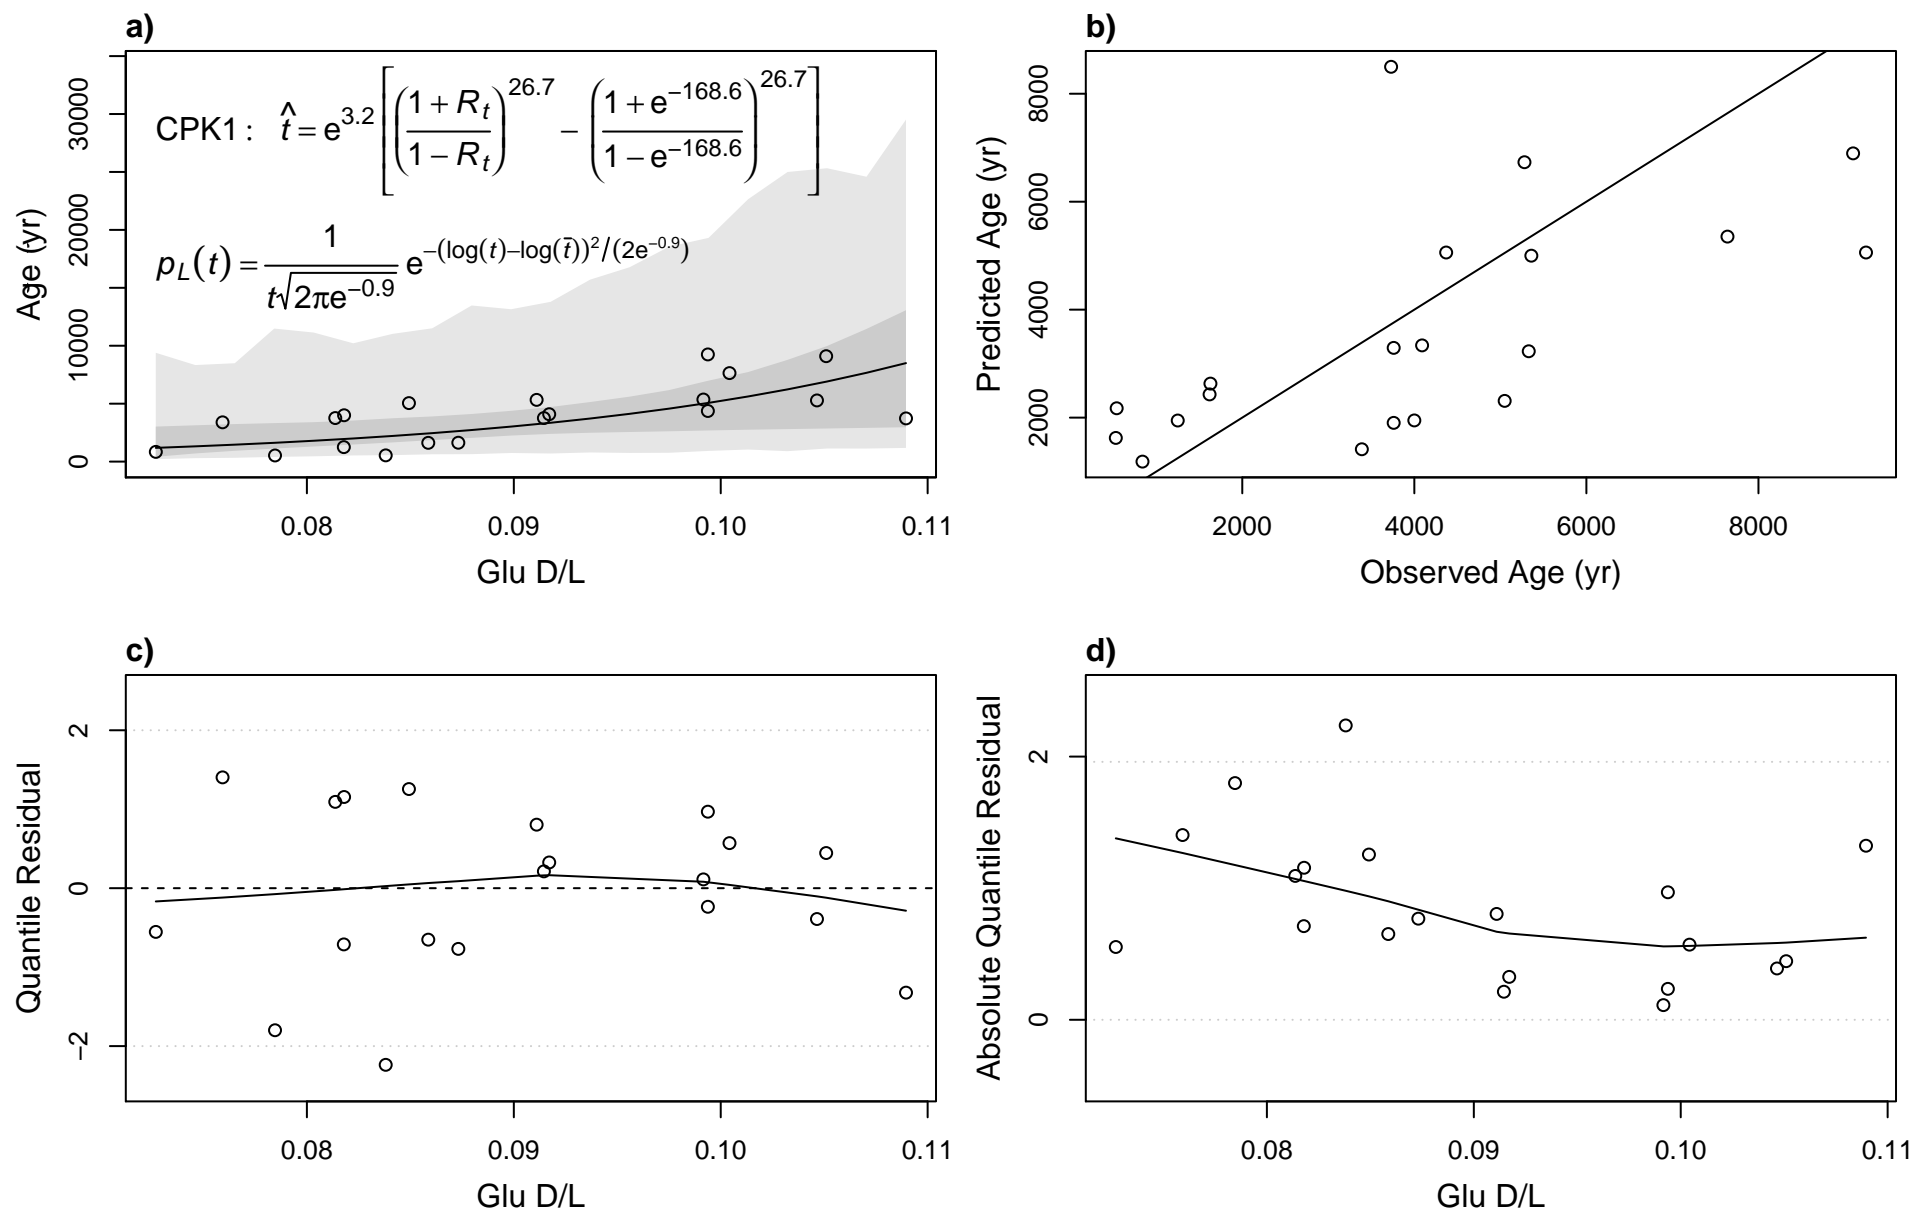

DR Figure 3. Continued: Model 23 (see DR Table 3); Taxon: Mya

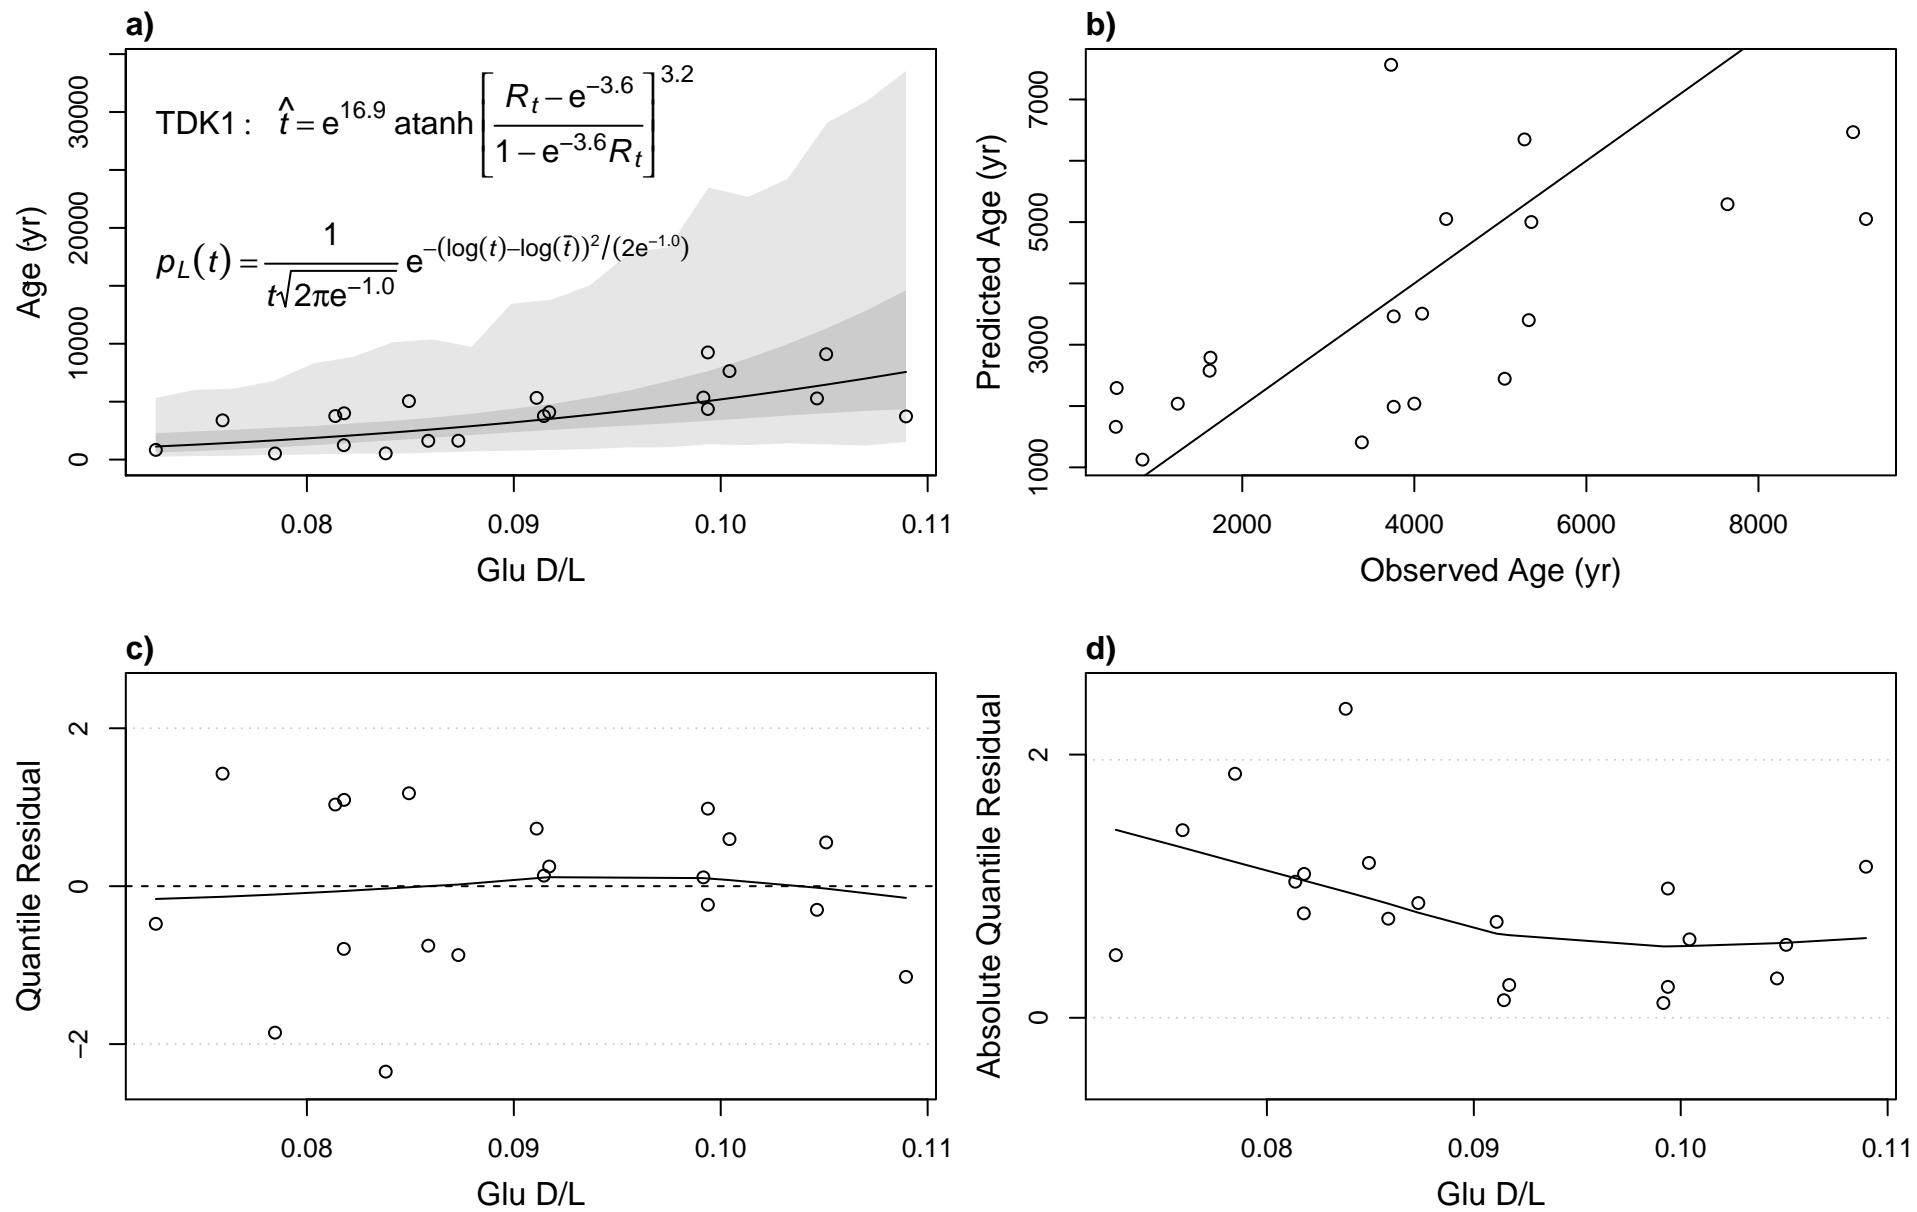

DR Figure 3. Continued: Model 24 (see DR Table 3); Taxon: Mya

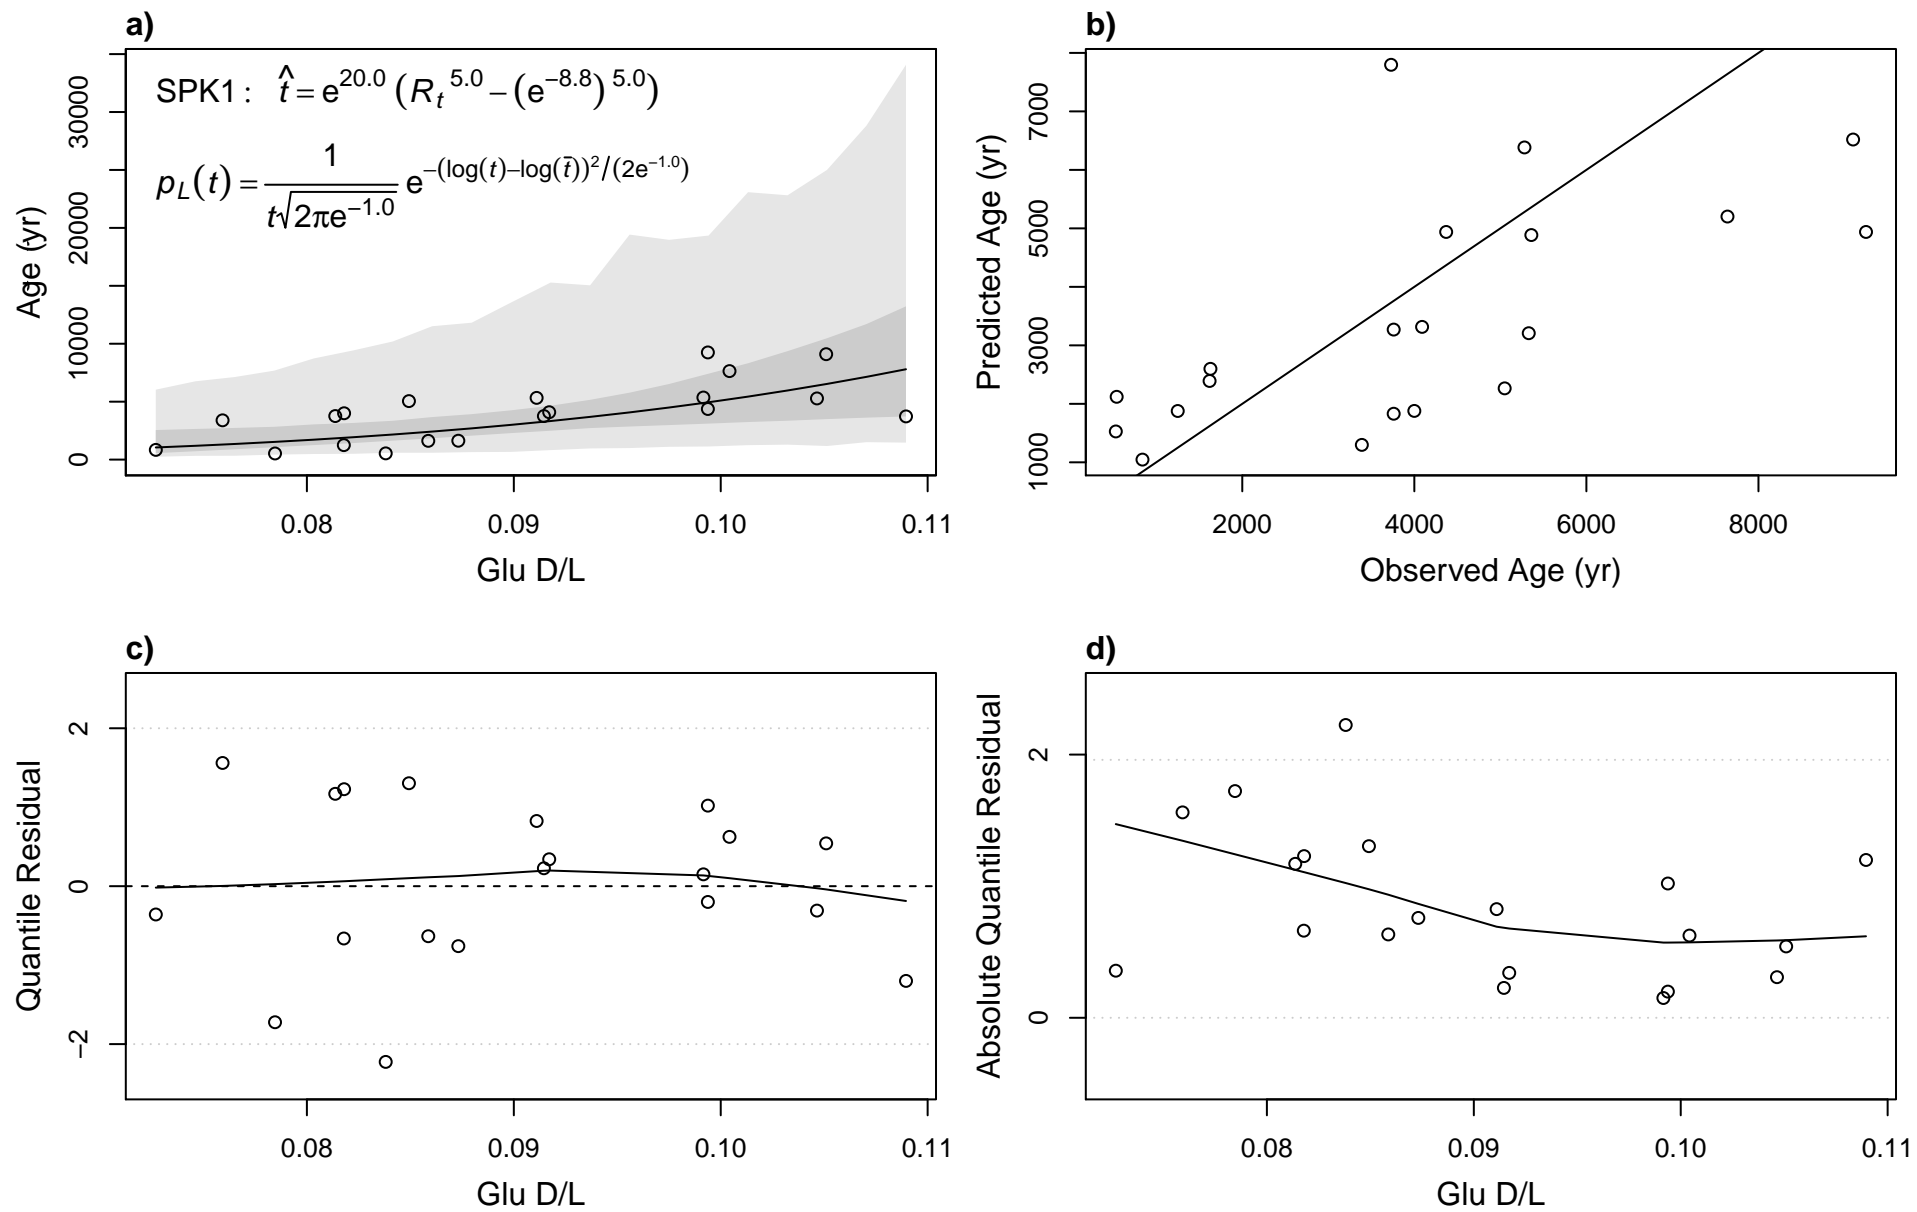



DR Figure 4. Plots of posterior distributions of the parameters for the models listed in DR Table 3. Filled triangles correspond to maximum-likelihood estimates for the parameters. Model 1 (from DR Table 3); Taxon: Mya.

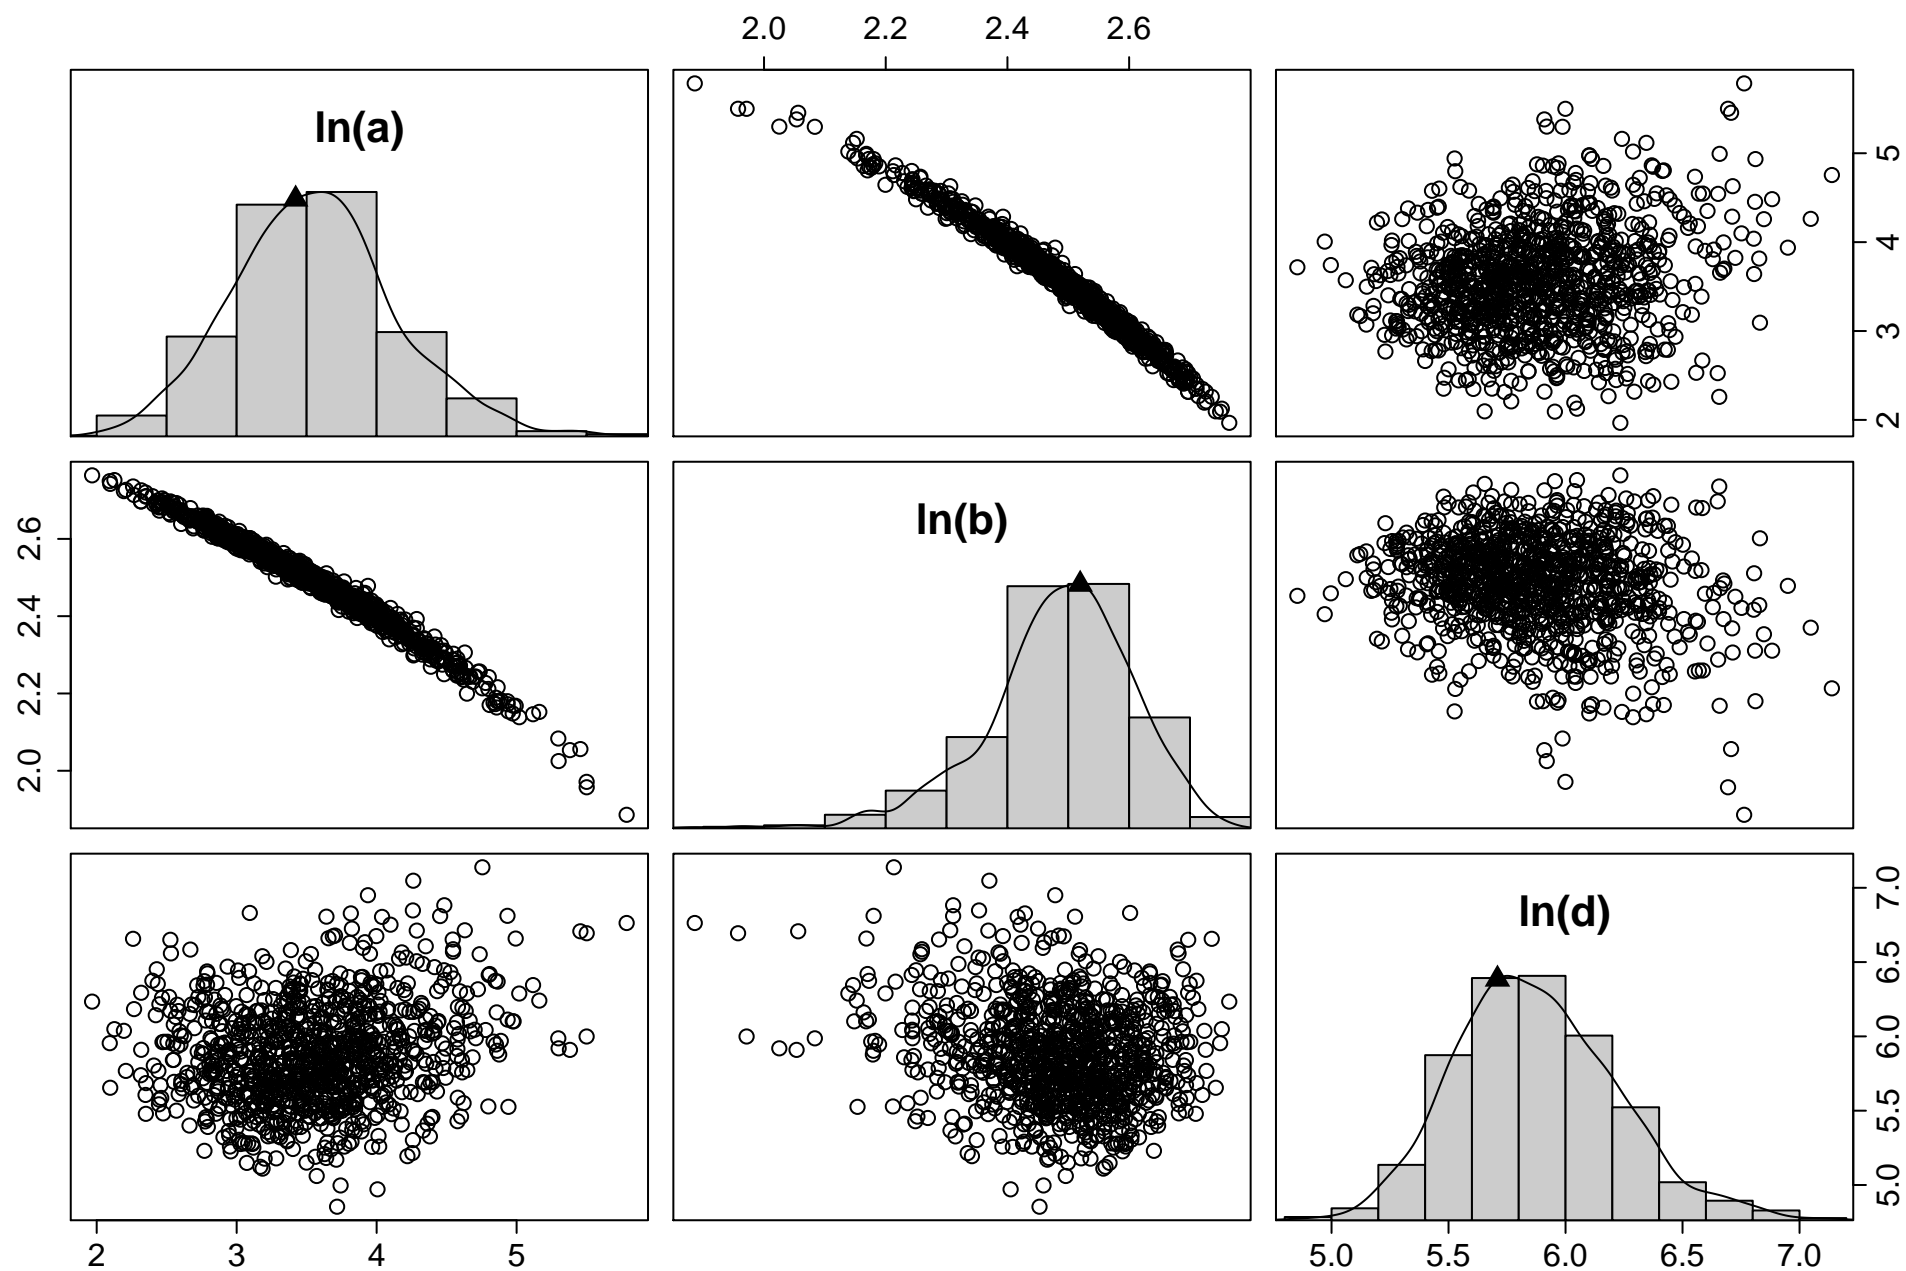

DR Figure 4. Continued: Model 2 (from DR Table 3); Taxon: Mya.

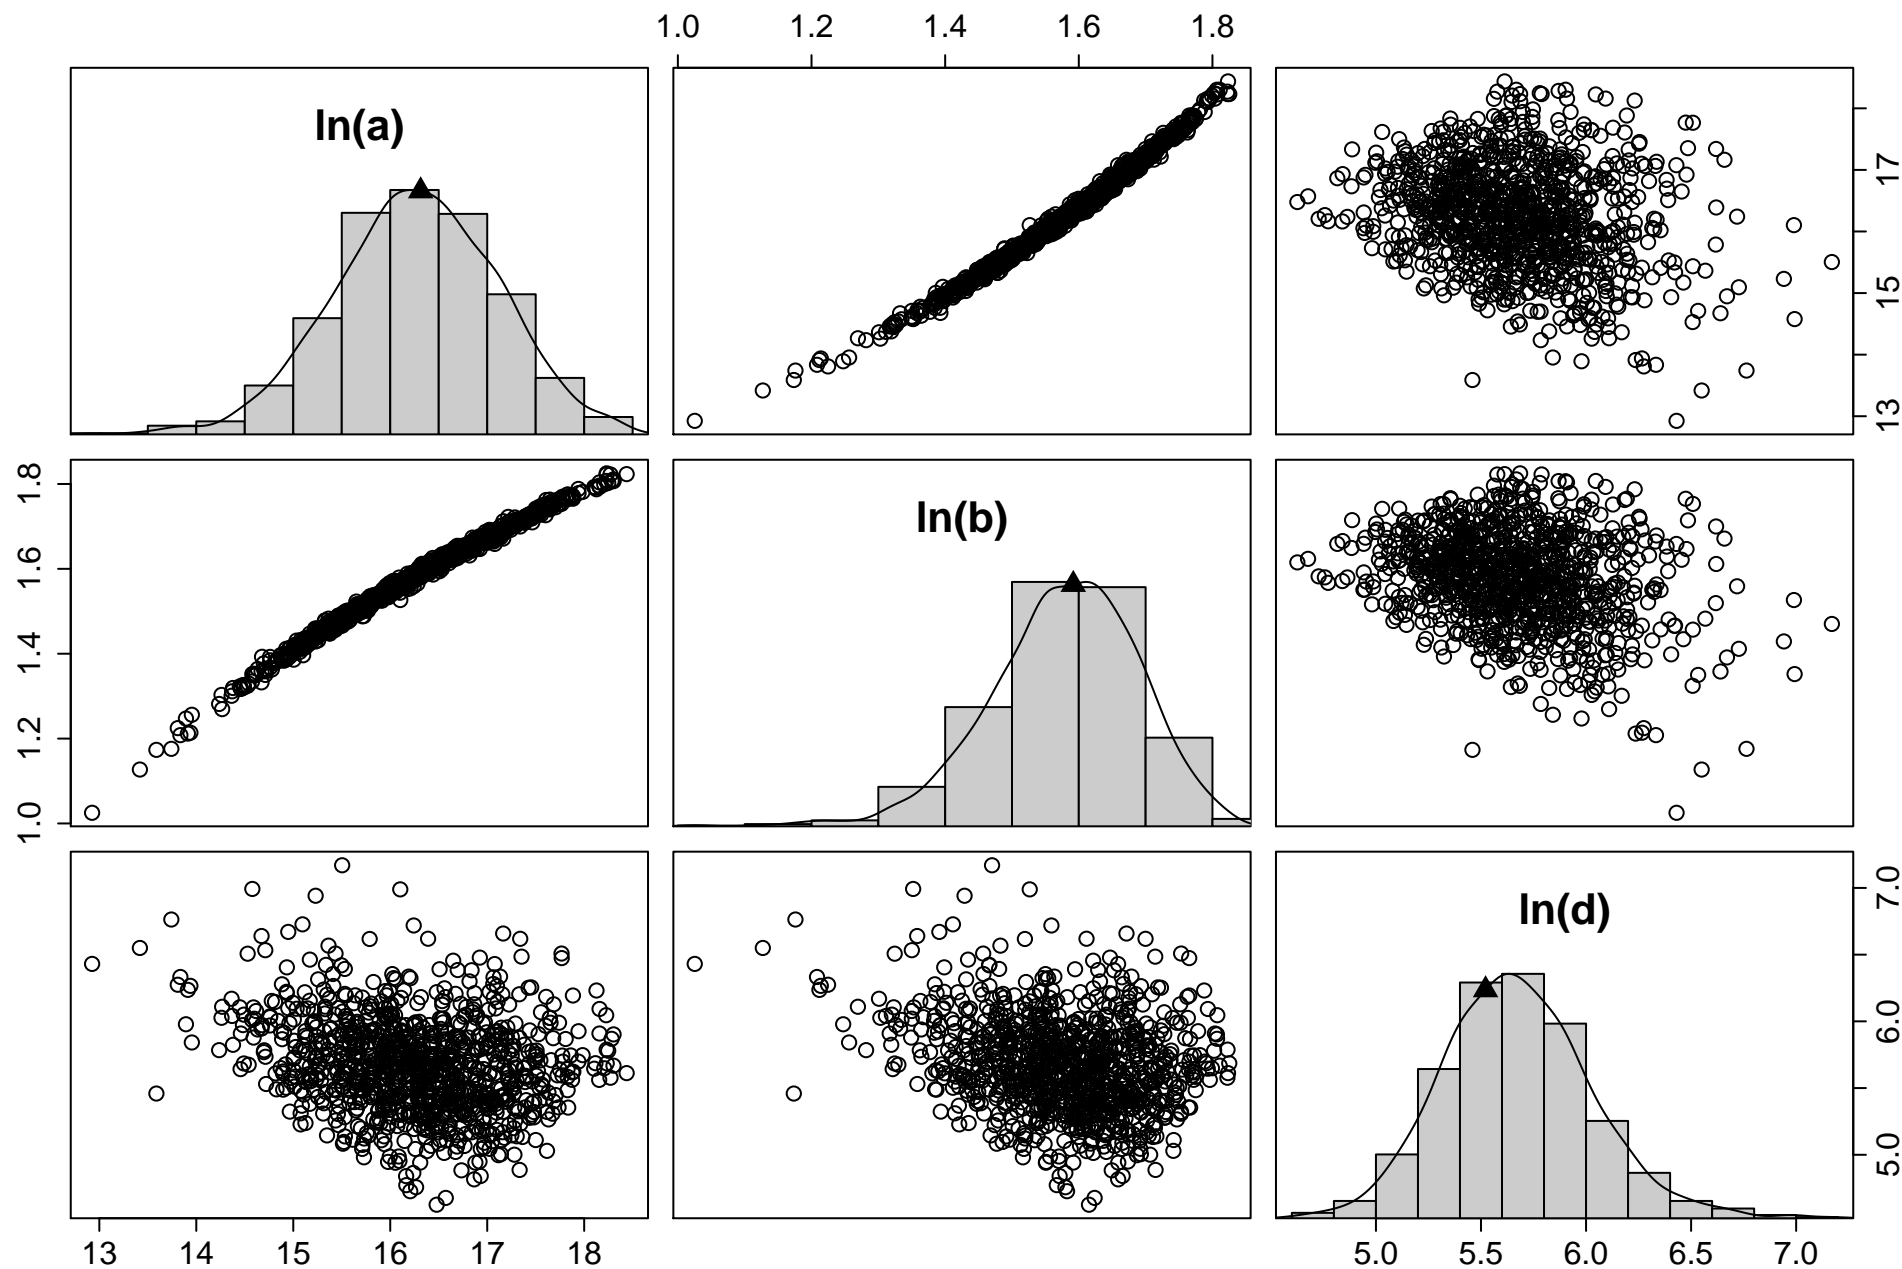

DR Figure 4. Continued: Model 3 (from DR Table 3); Taxon: Mya.

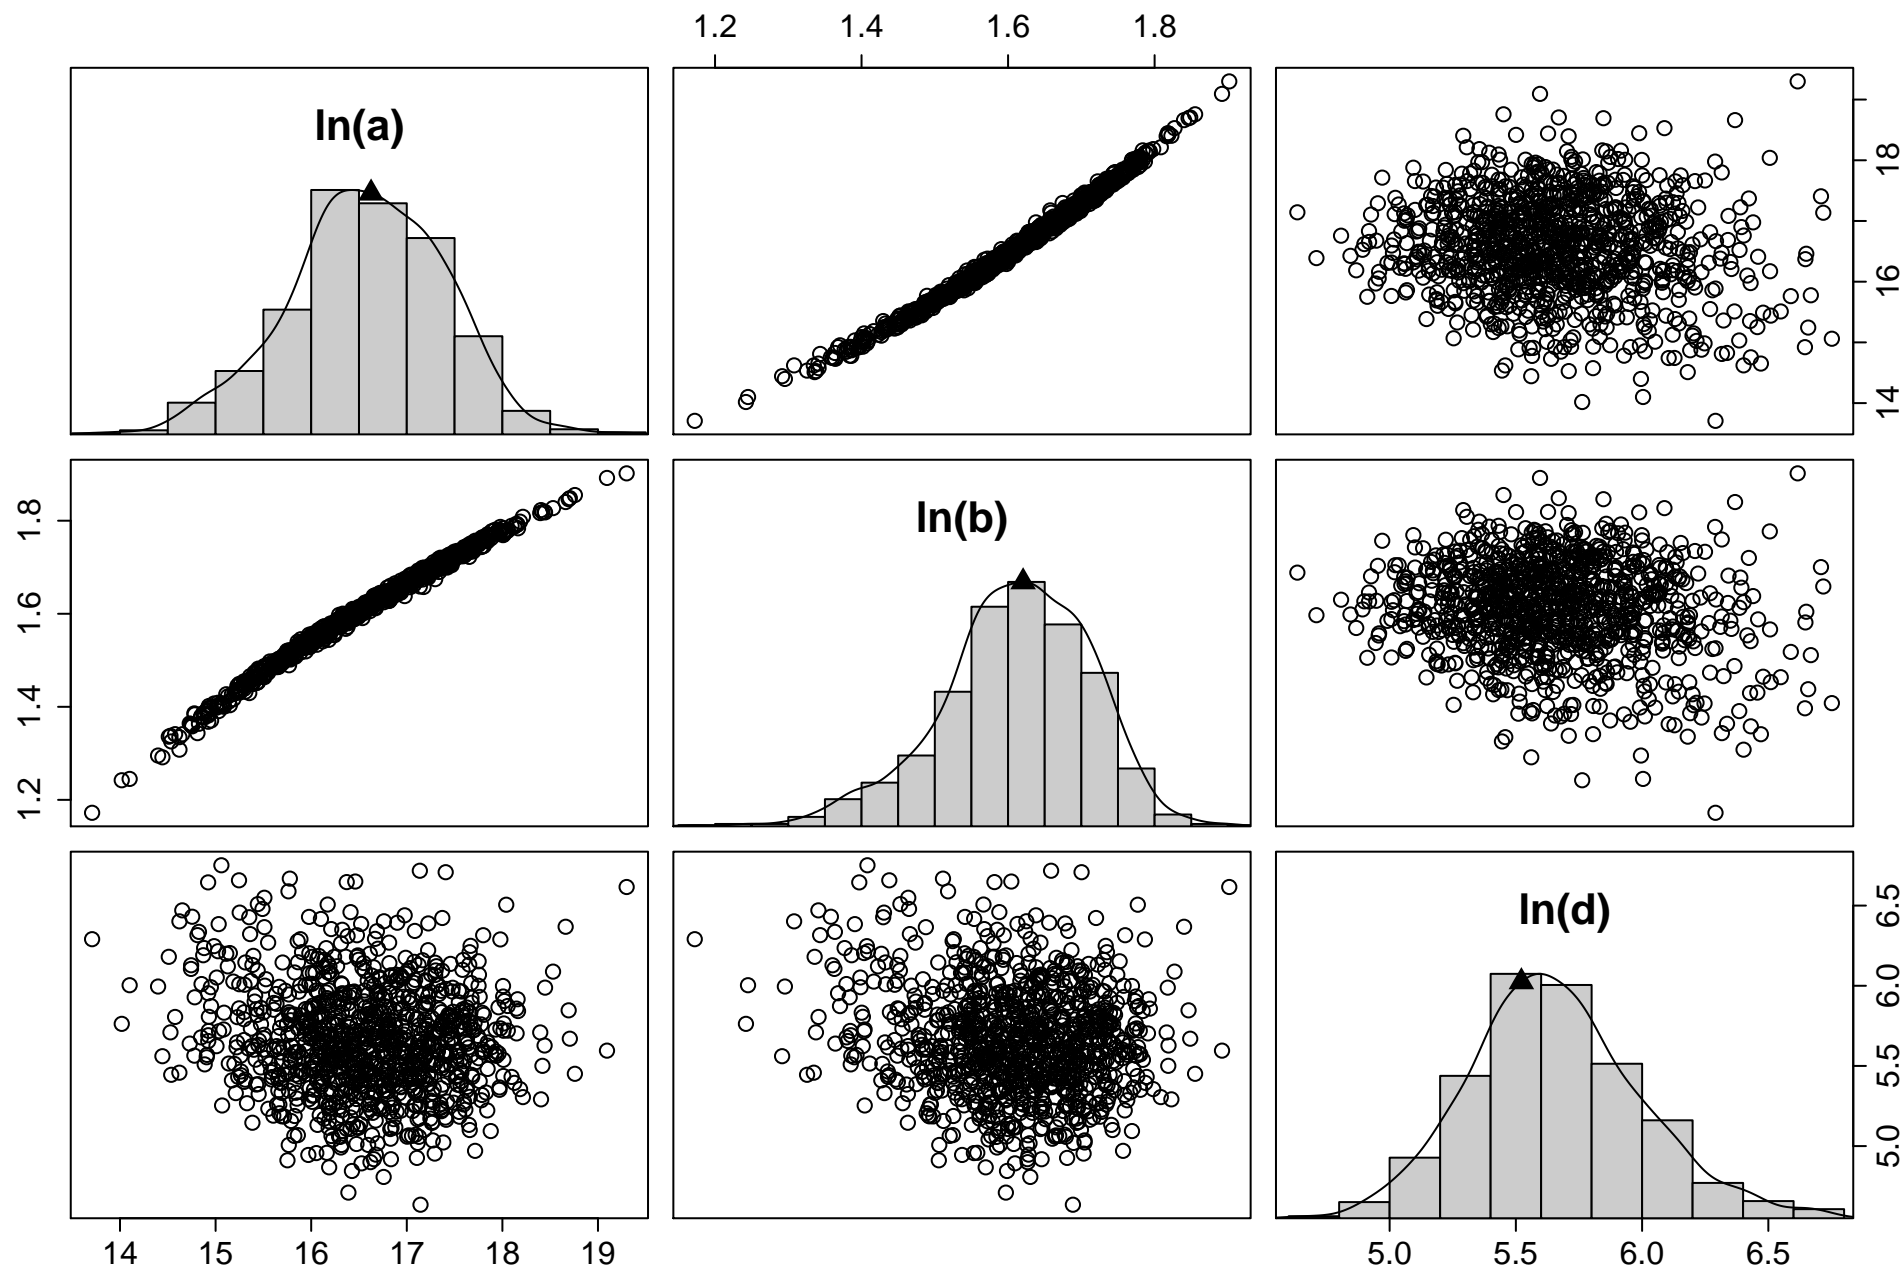

DR Figure 4. Continued: Model 4 (from DR Table 3); Taxon: Mya.

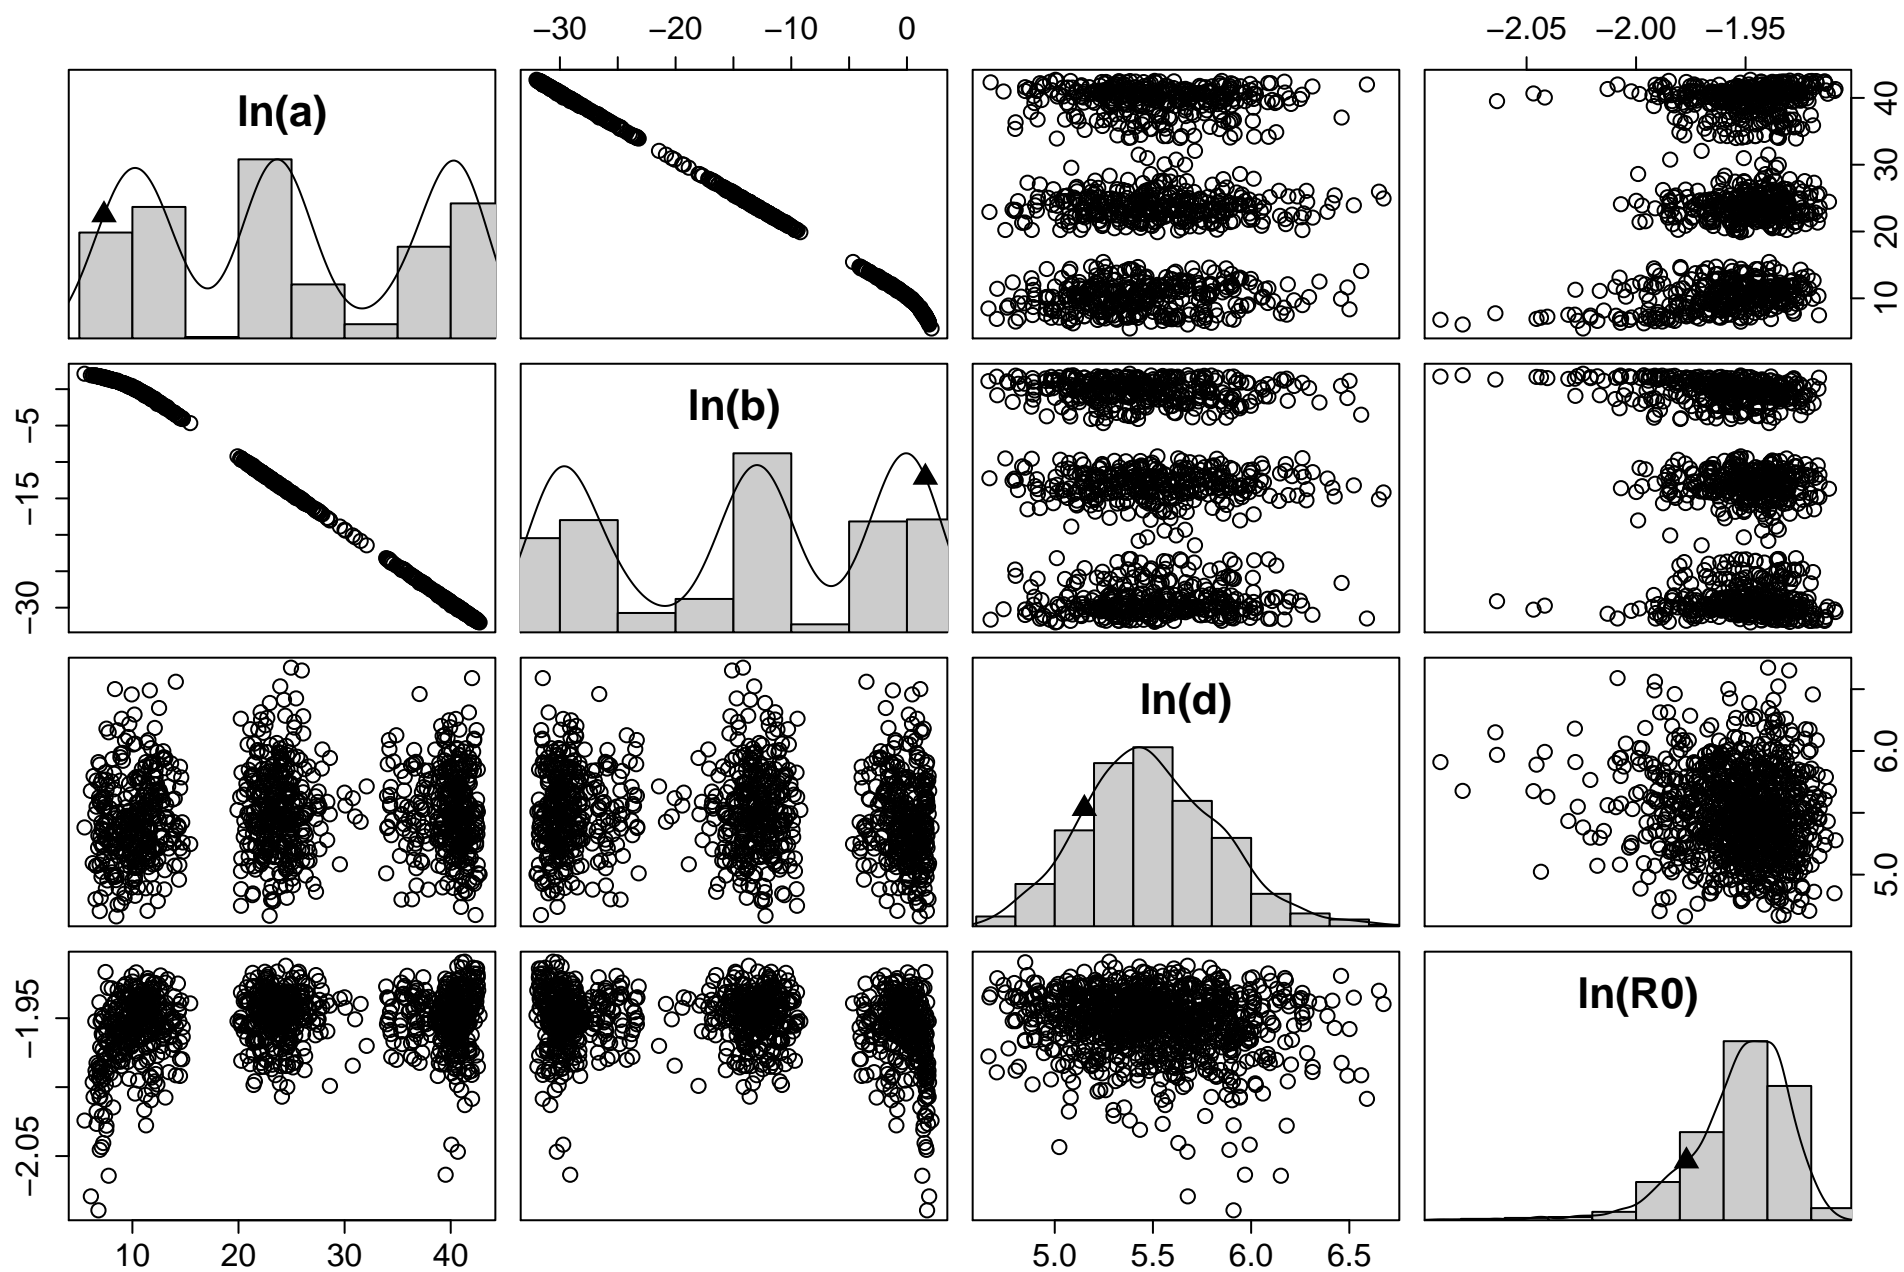

DR Figure 4. Continued: Model 5 (from DR Table 3); Taxon: Mya.

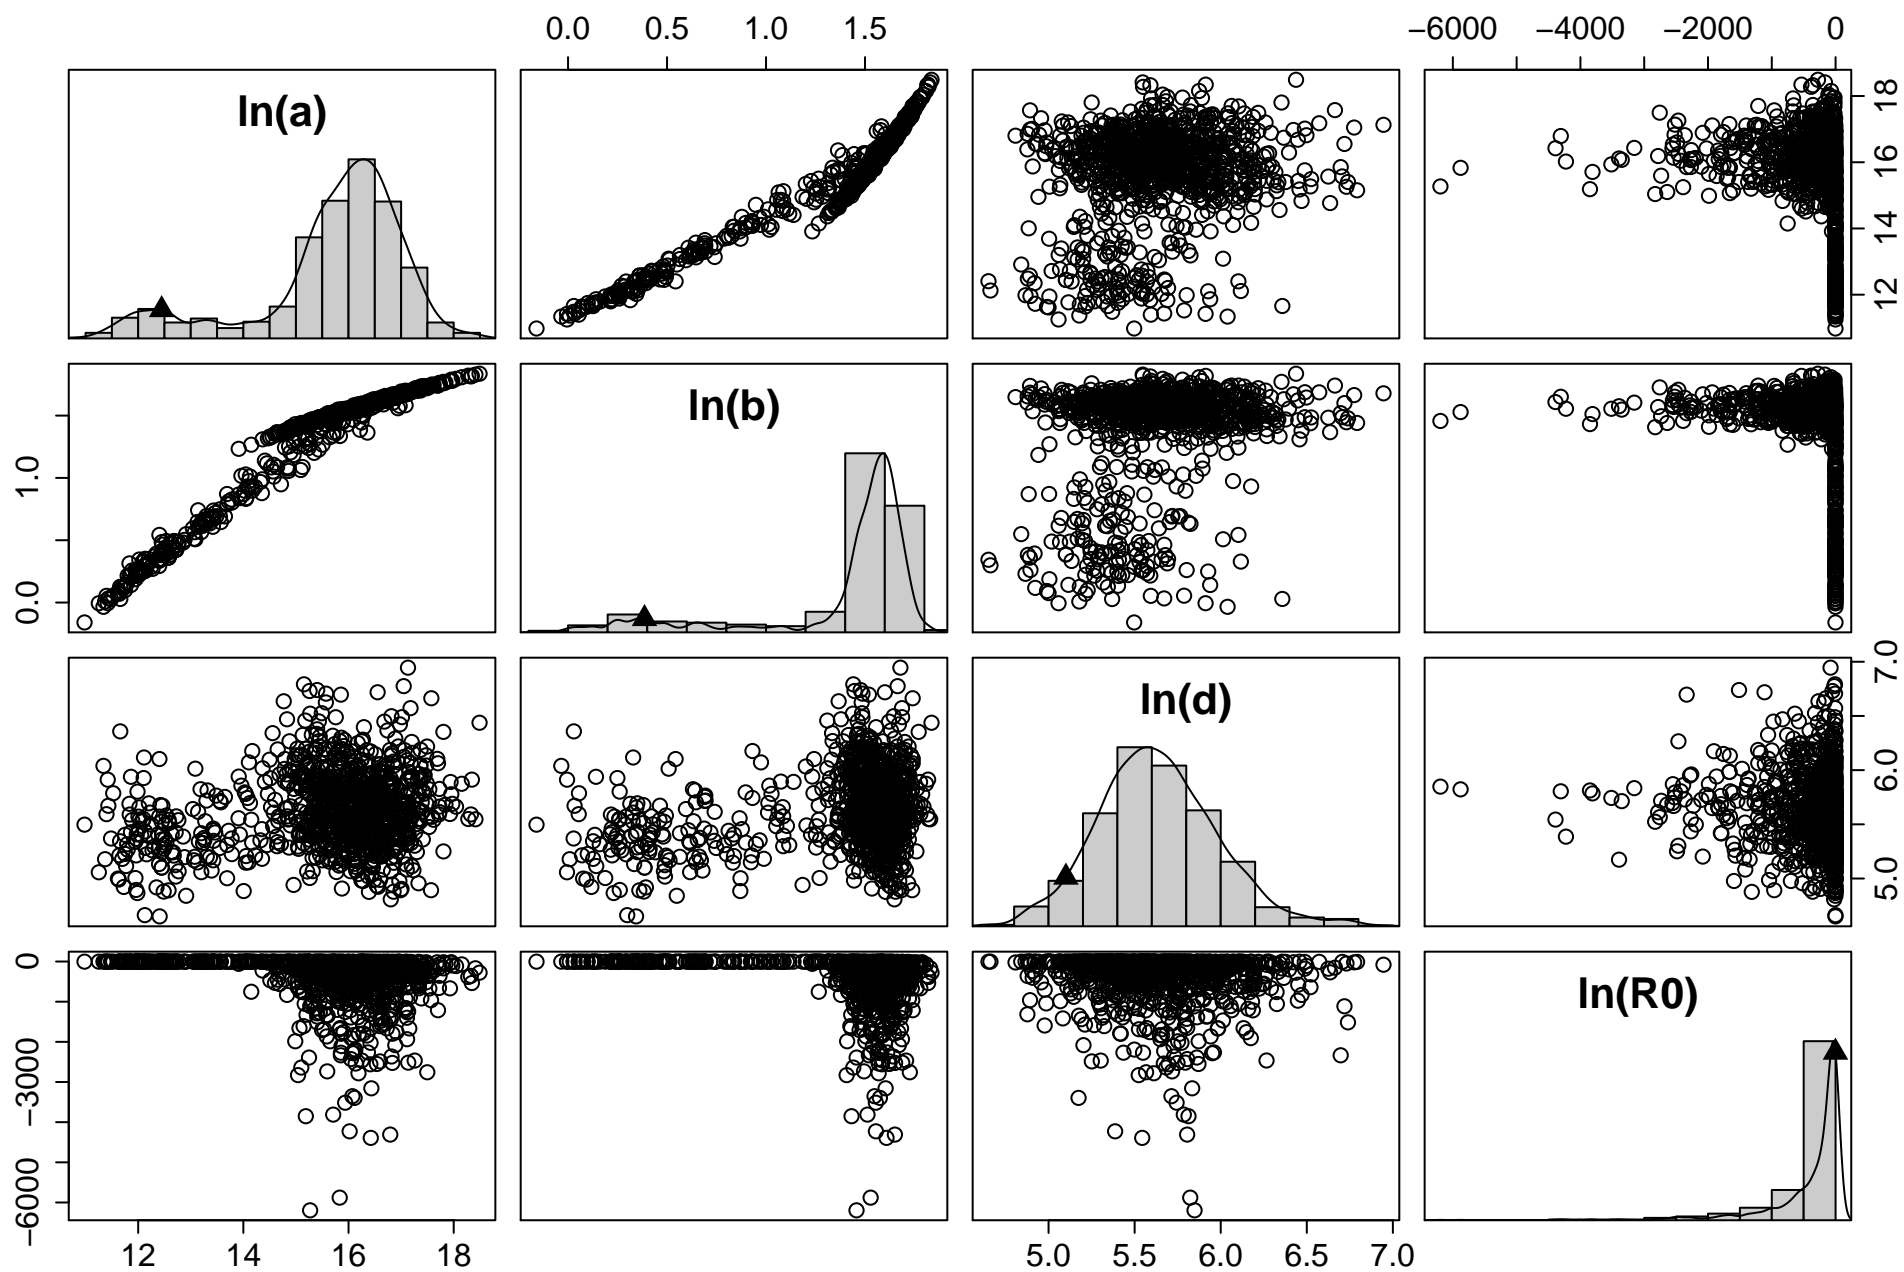

DR Figure 4. Continued: Model 6 (from DR Table 3); Taxon: Mya.

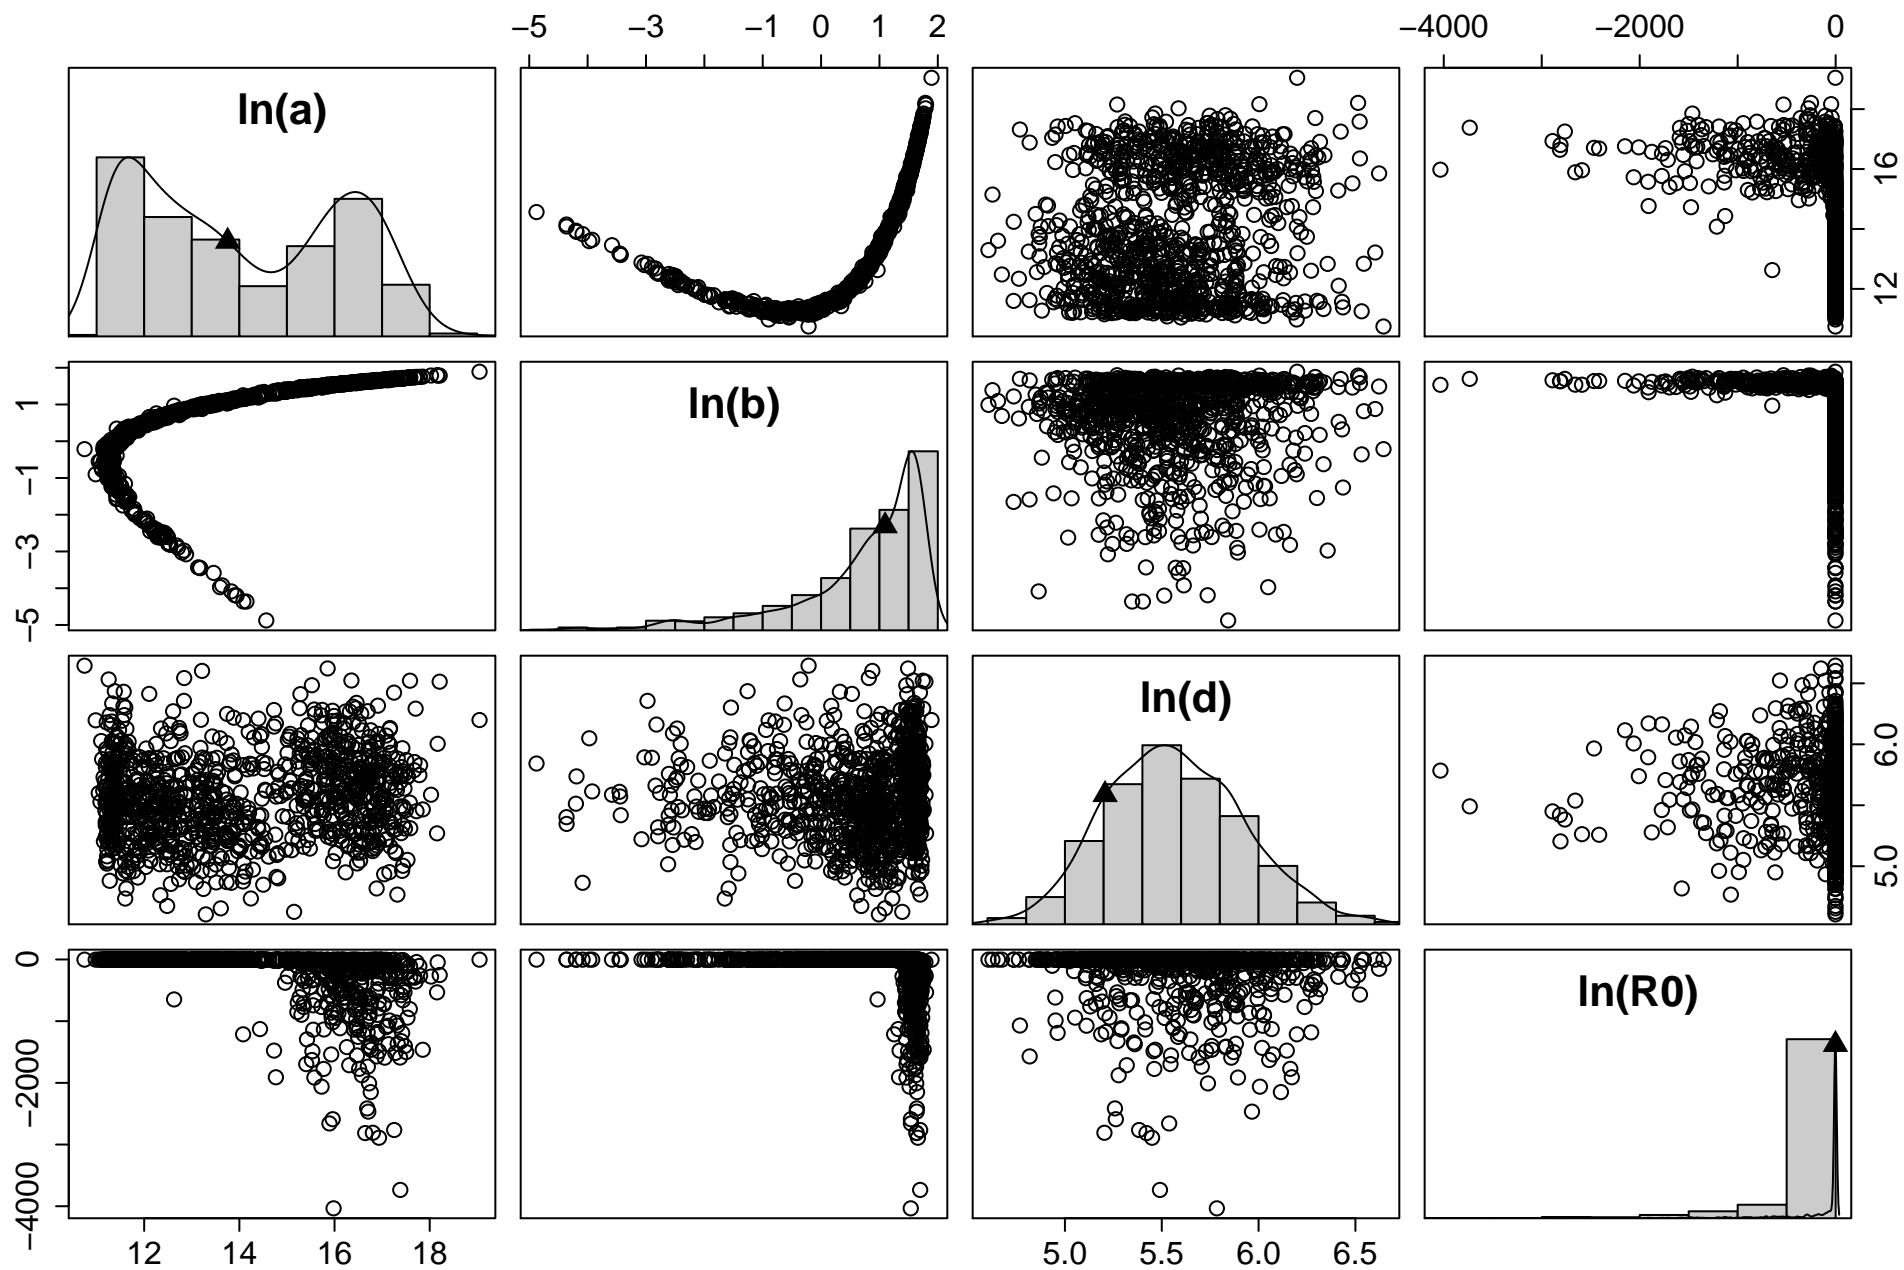

DR Figure 4. Continued: Model 7 (from DR Table 3); Taxon: Mya.

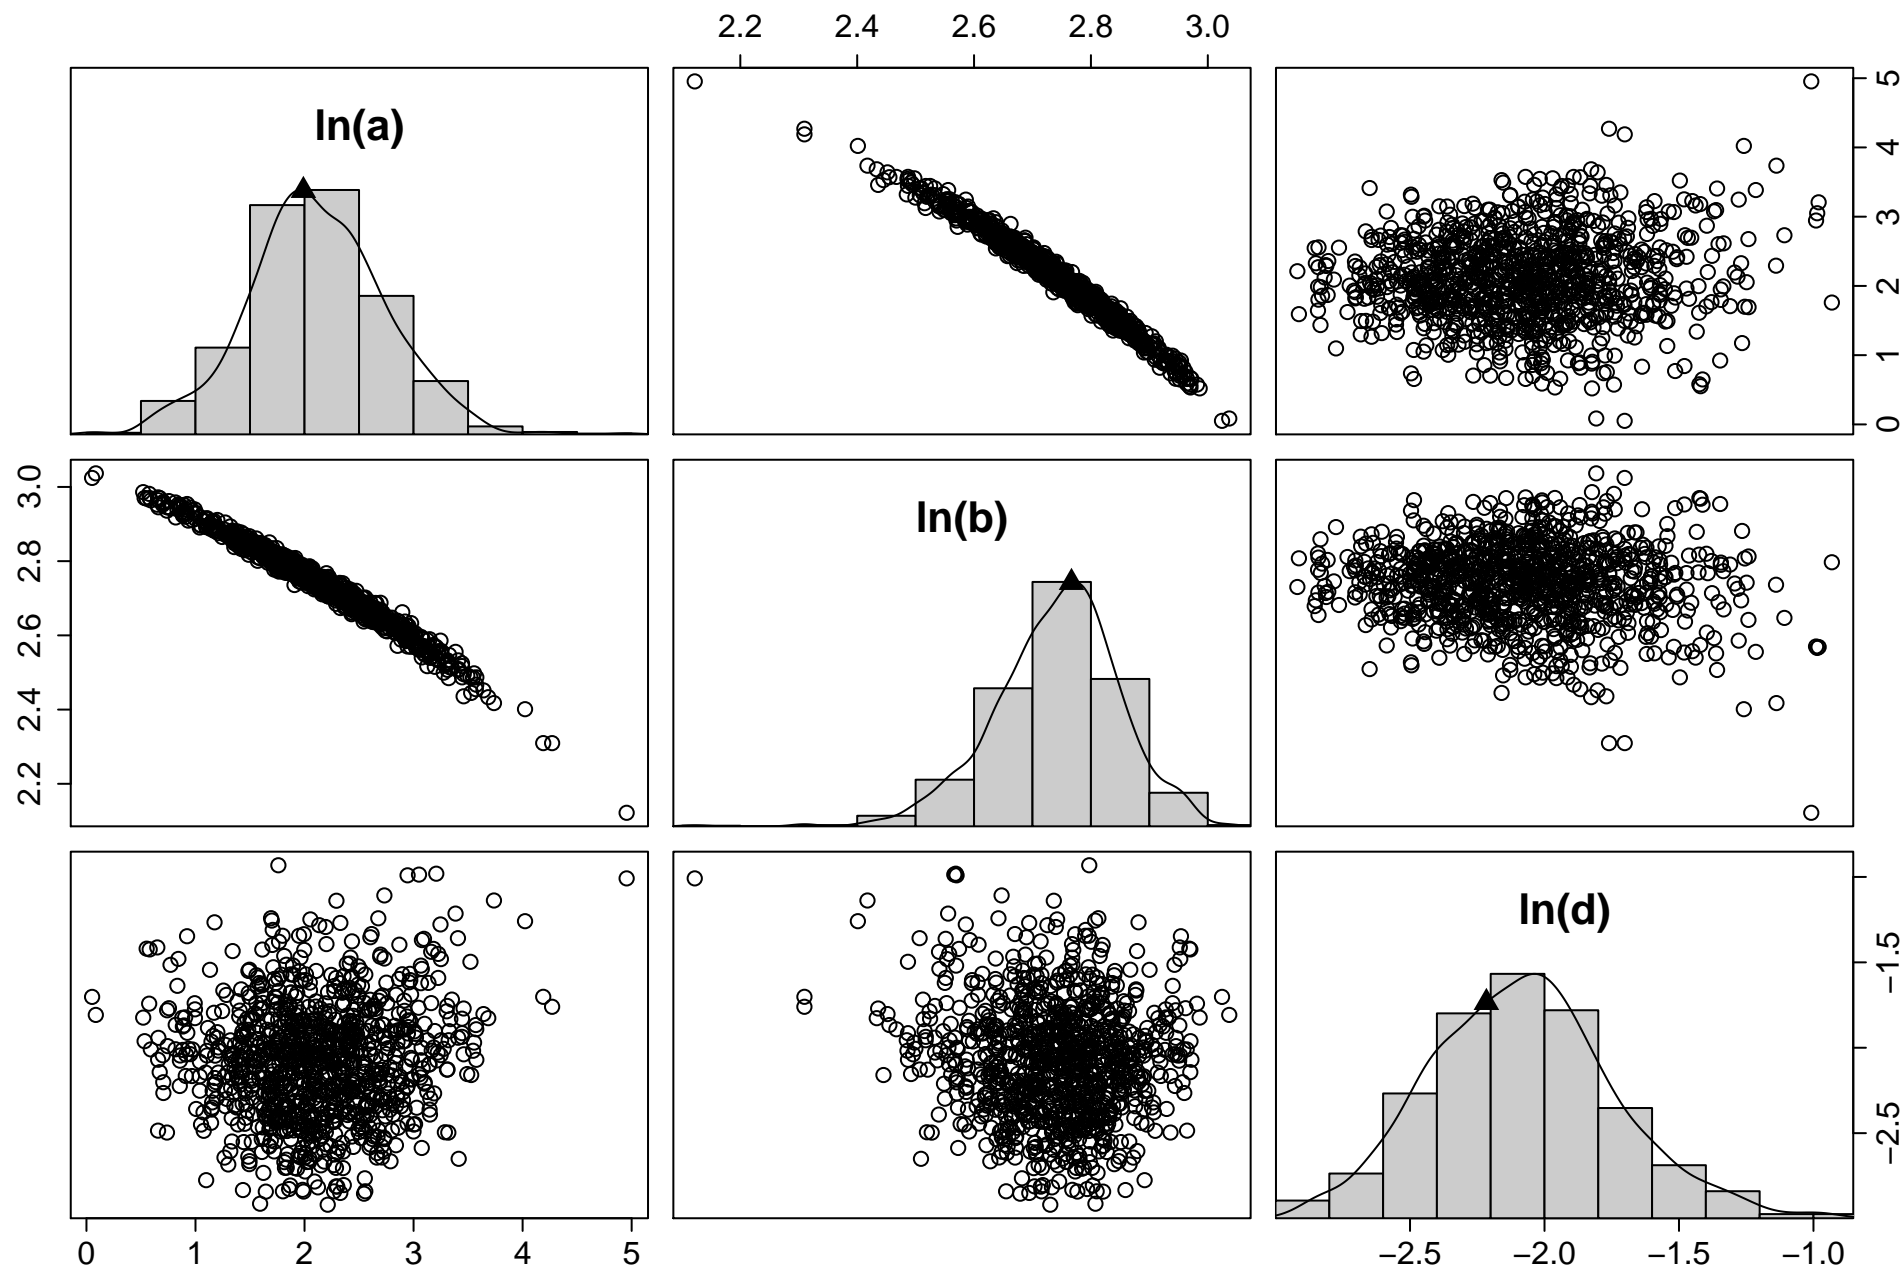

DR Figure 4. Continued: Model 8 (from DR Table 3); Taxon: Mya.

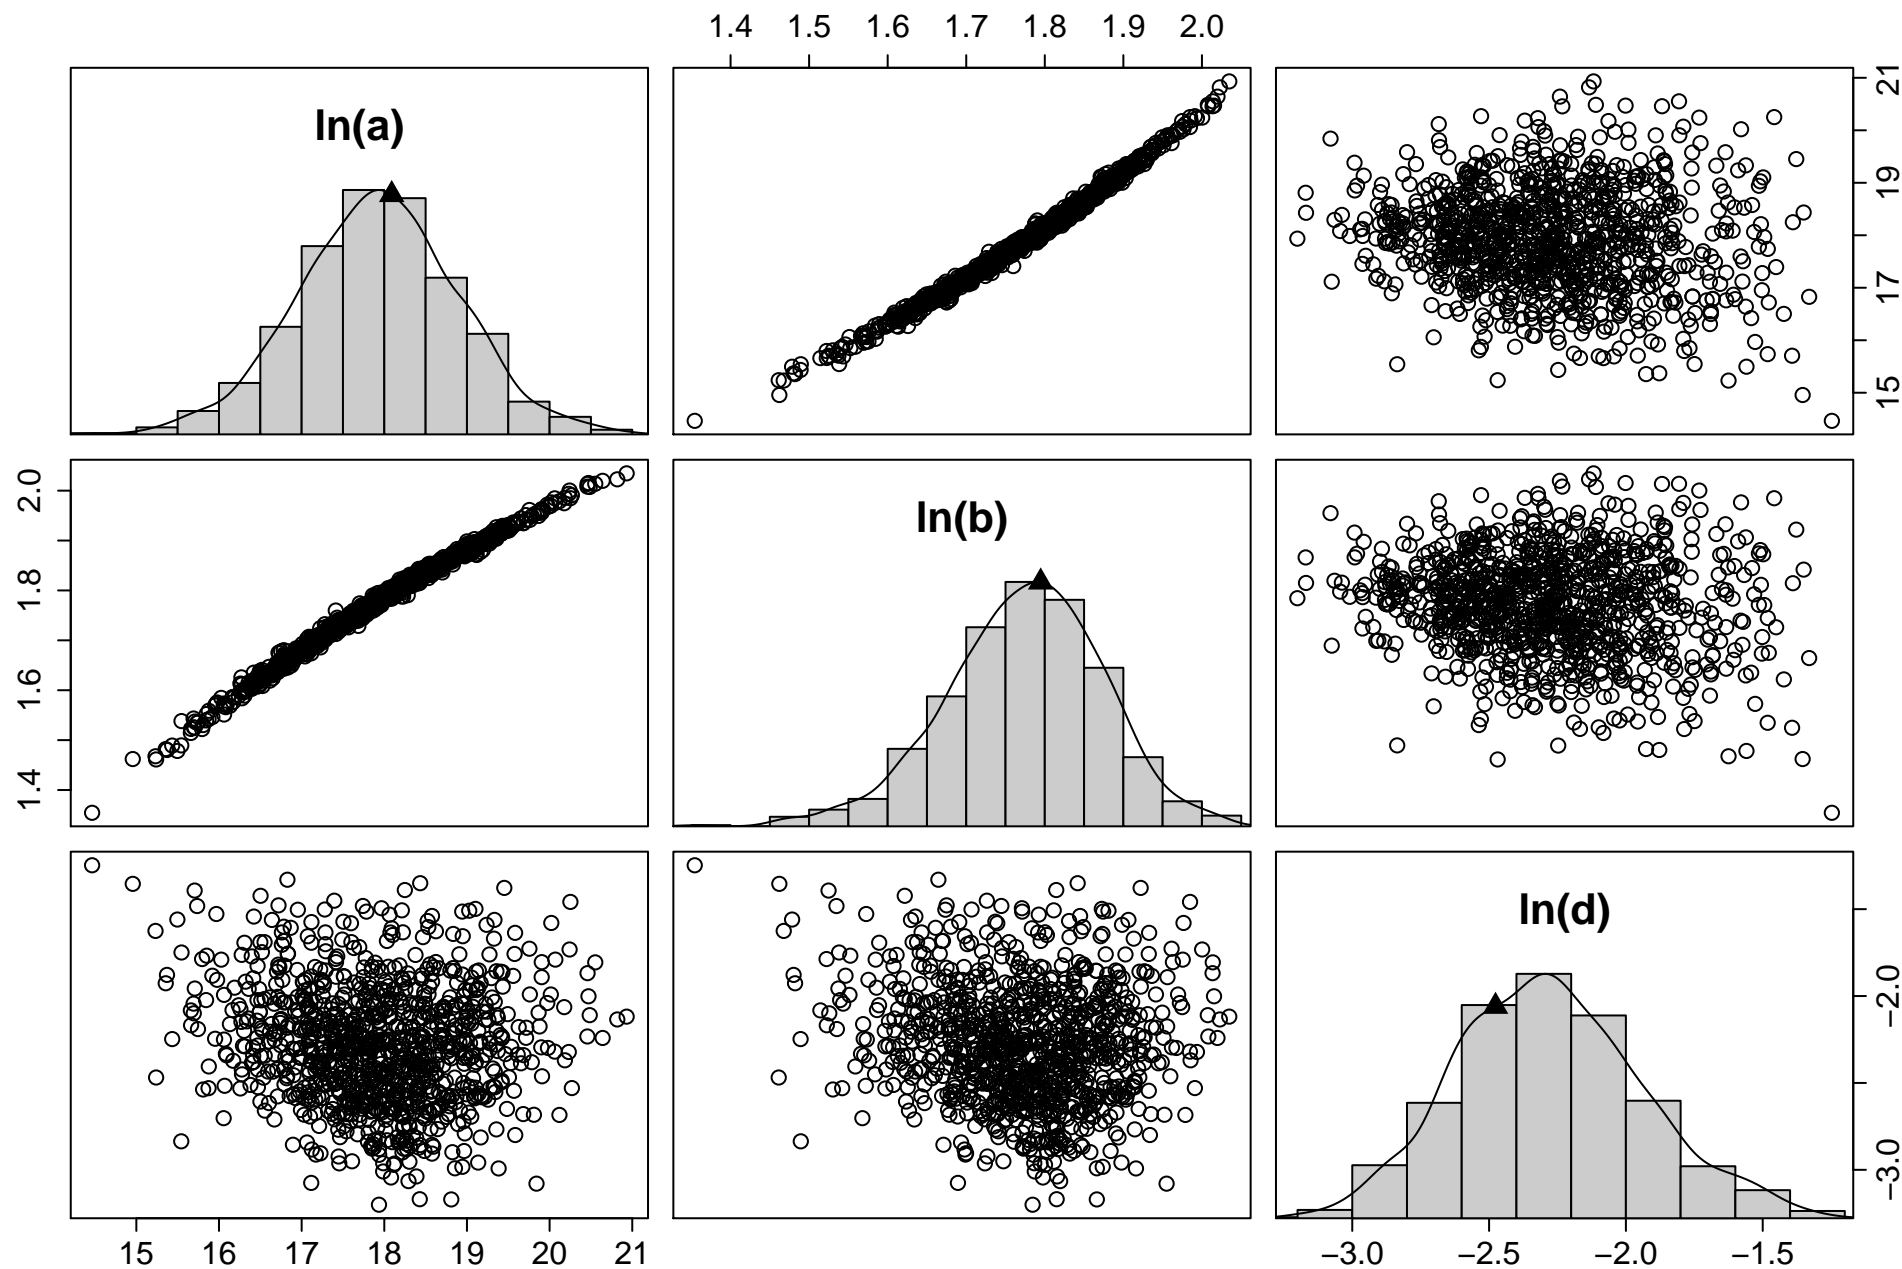



DR Figure 4. Continued: Model 9 (from DR Table 3); Taxon: Mya.

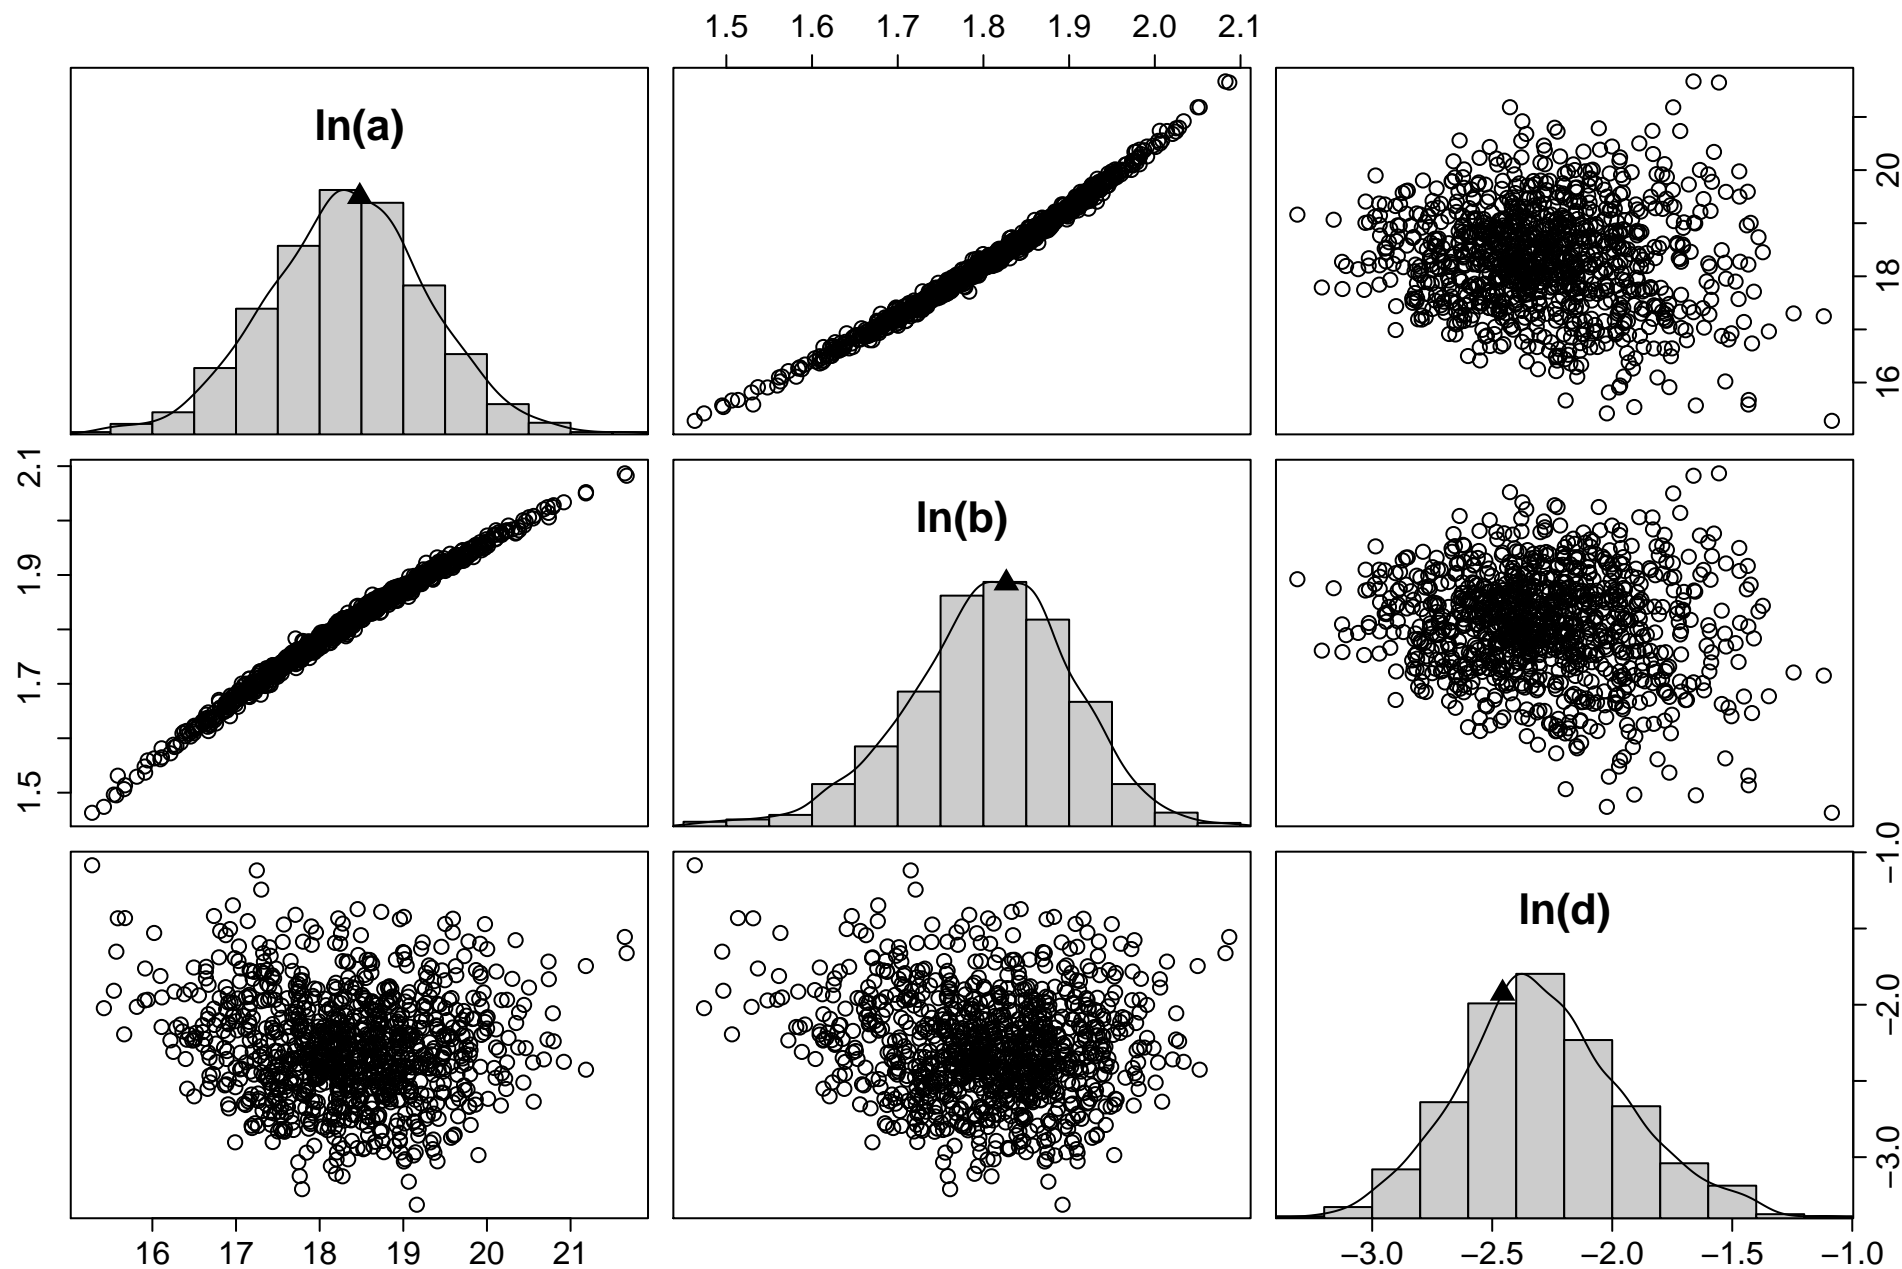

DR Figure 4. Continued: Model 10 (from DR Table 3); Taxon: Mya.

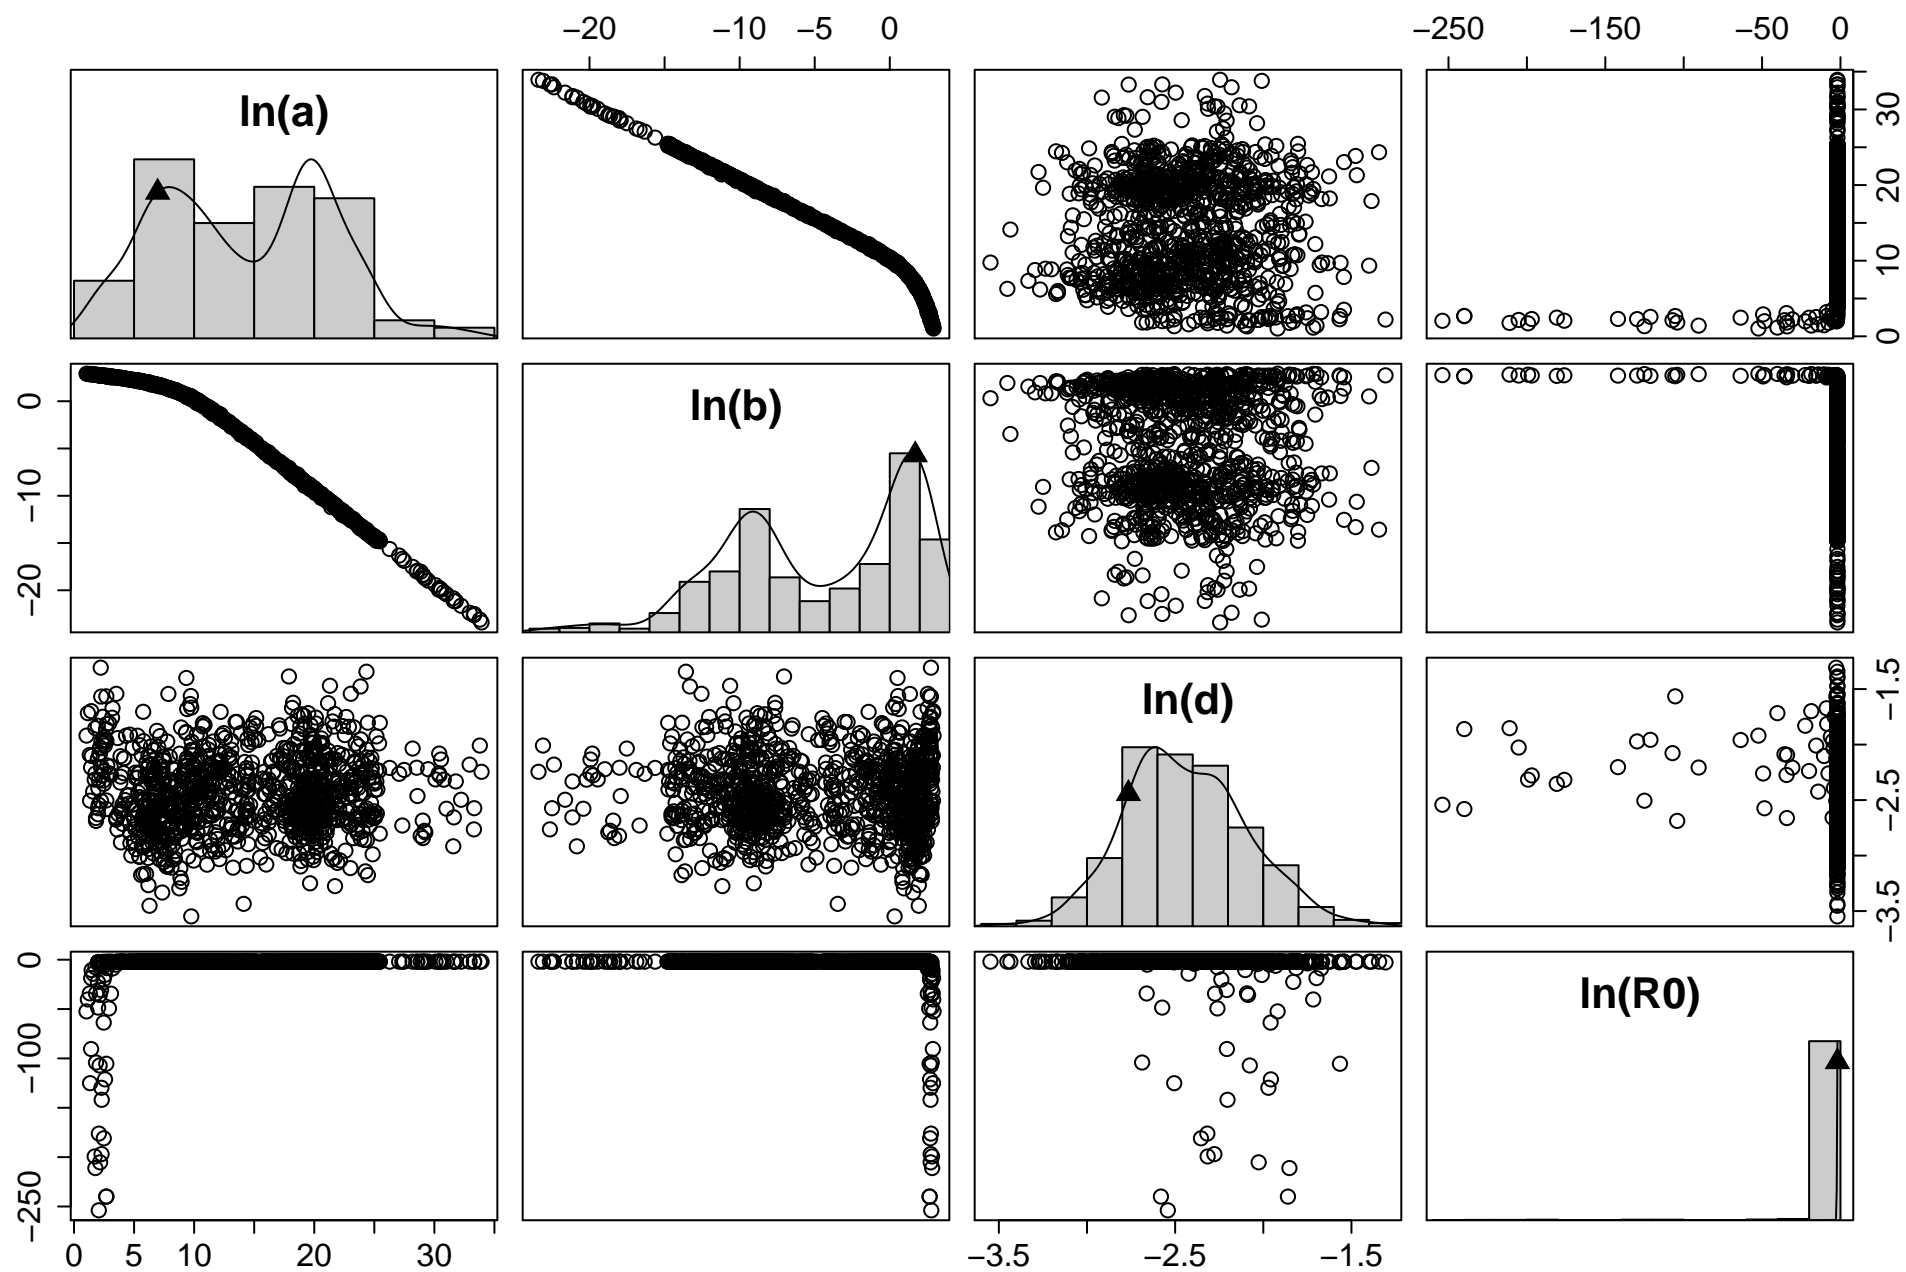

DR Figure 4. Continued: Model 11 (from DR Table 3); Taxon: Mya.

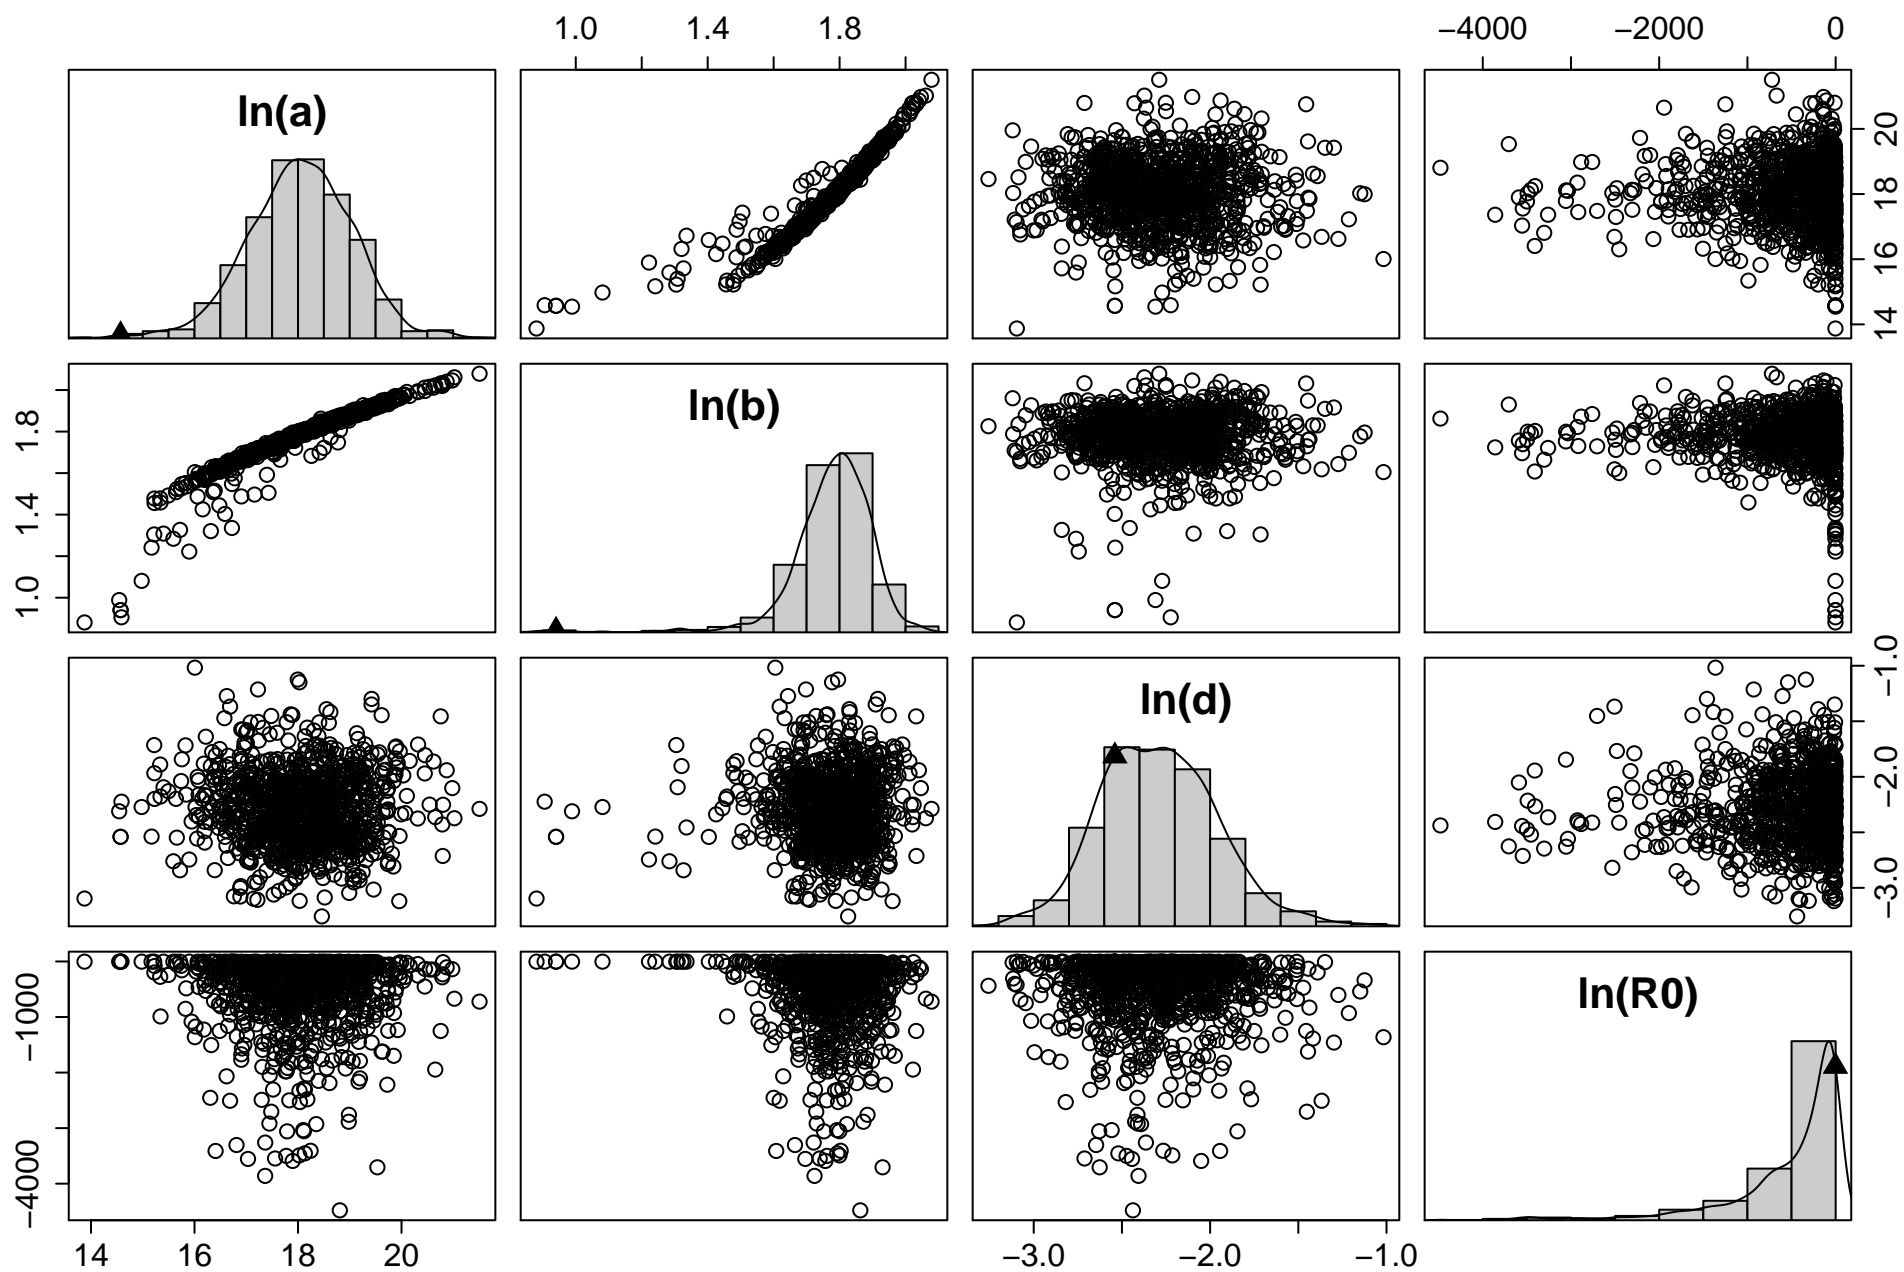

DR Figure 4. Continued: Model 12 (from DR Table 3); Taxon: Mya.

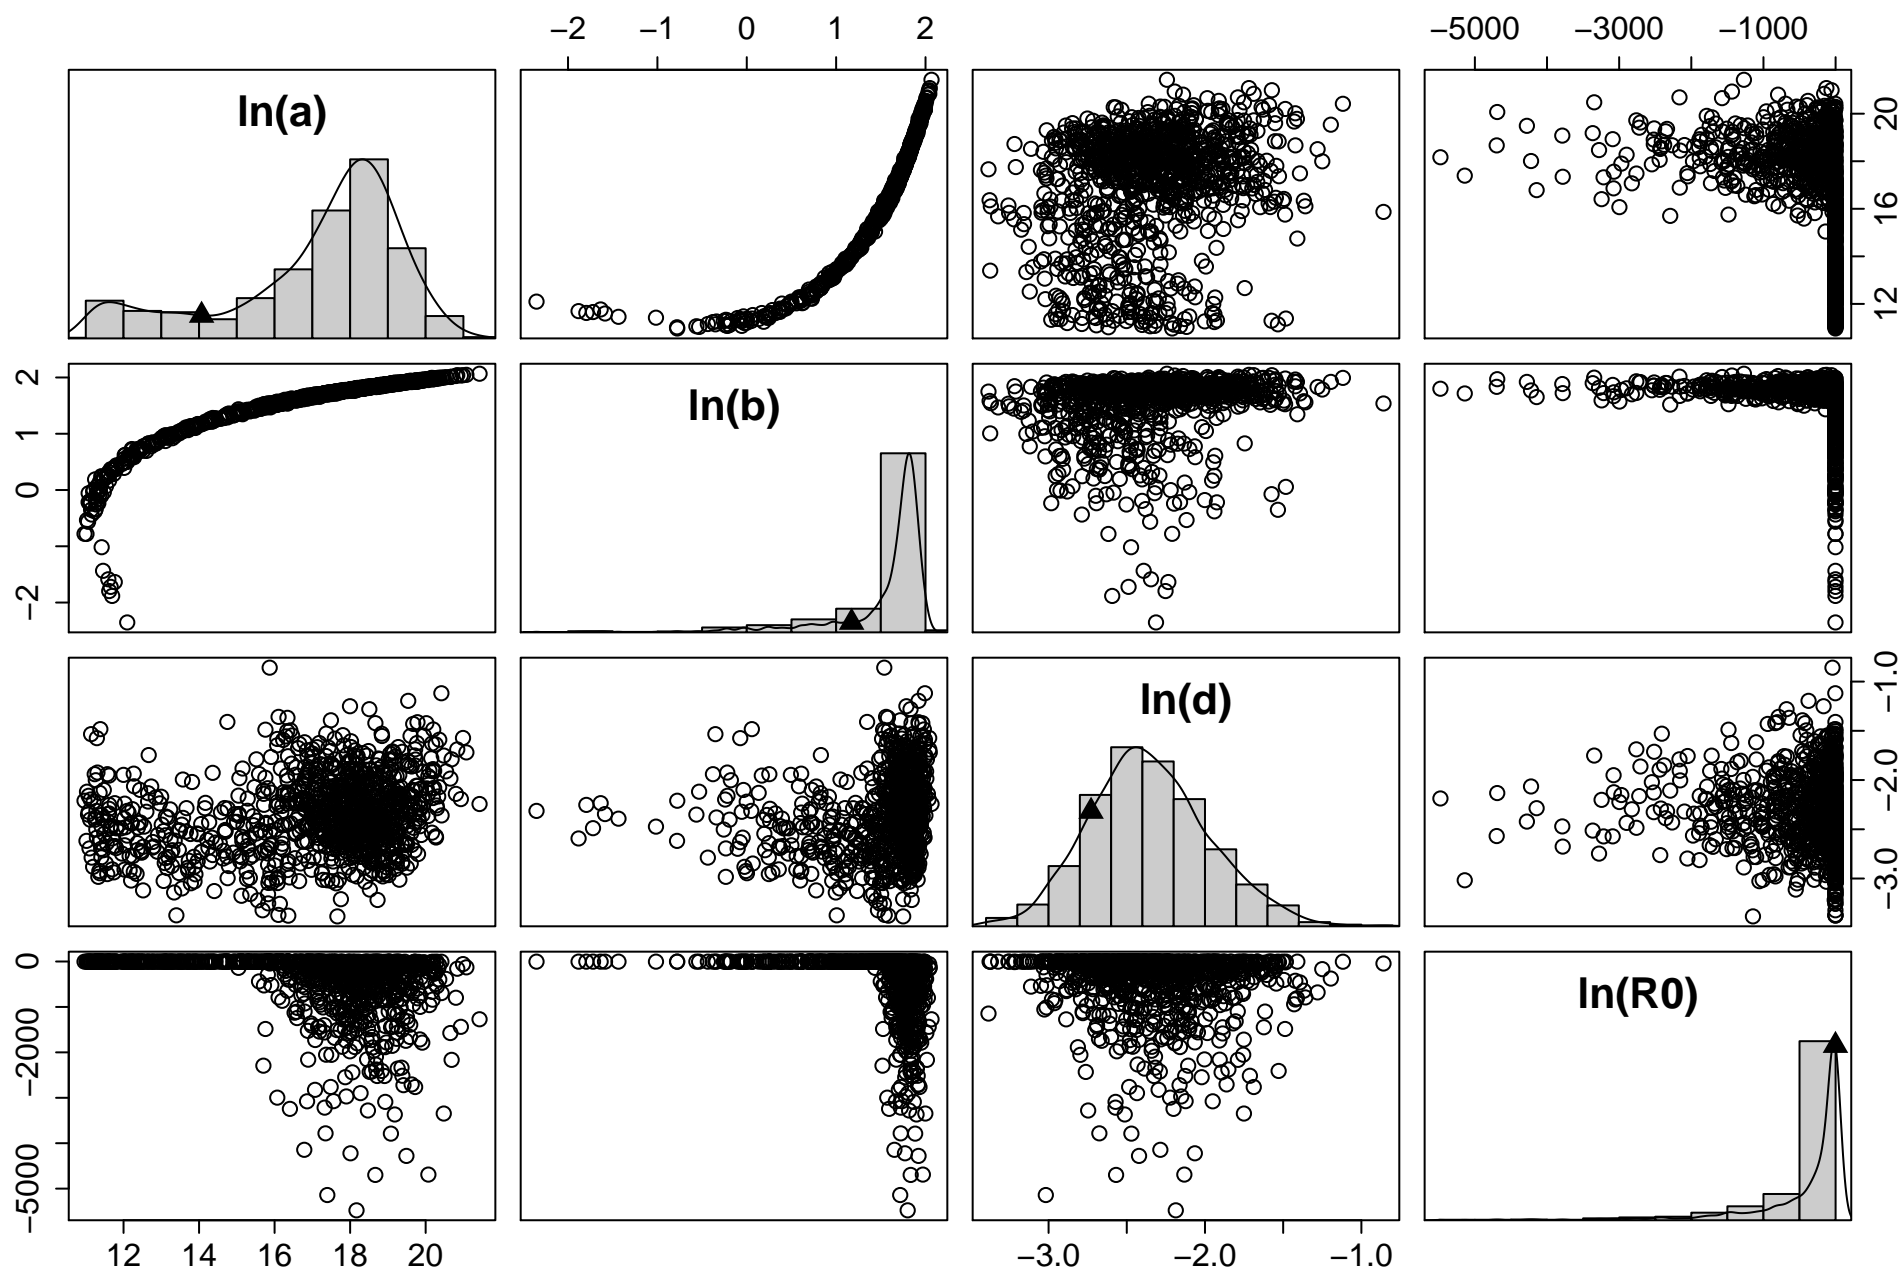

DR Figure 4. Continued: Model 13 (from DR Table 3); Taxon: Mya.

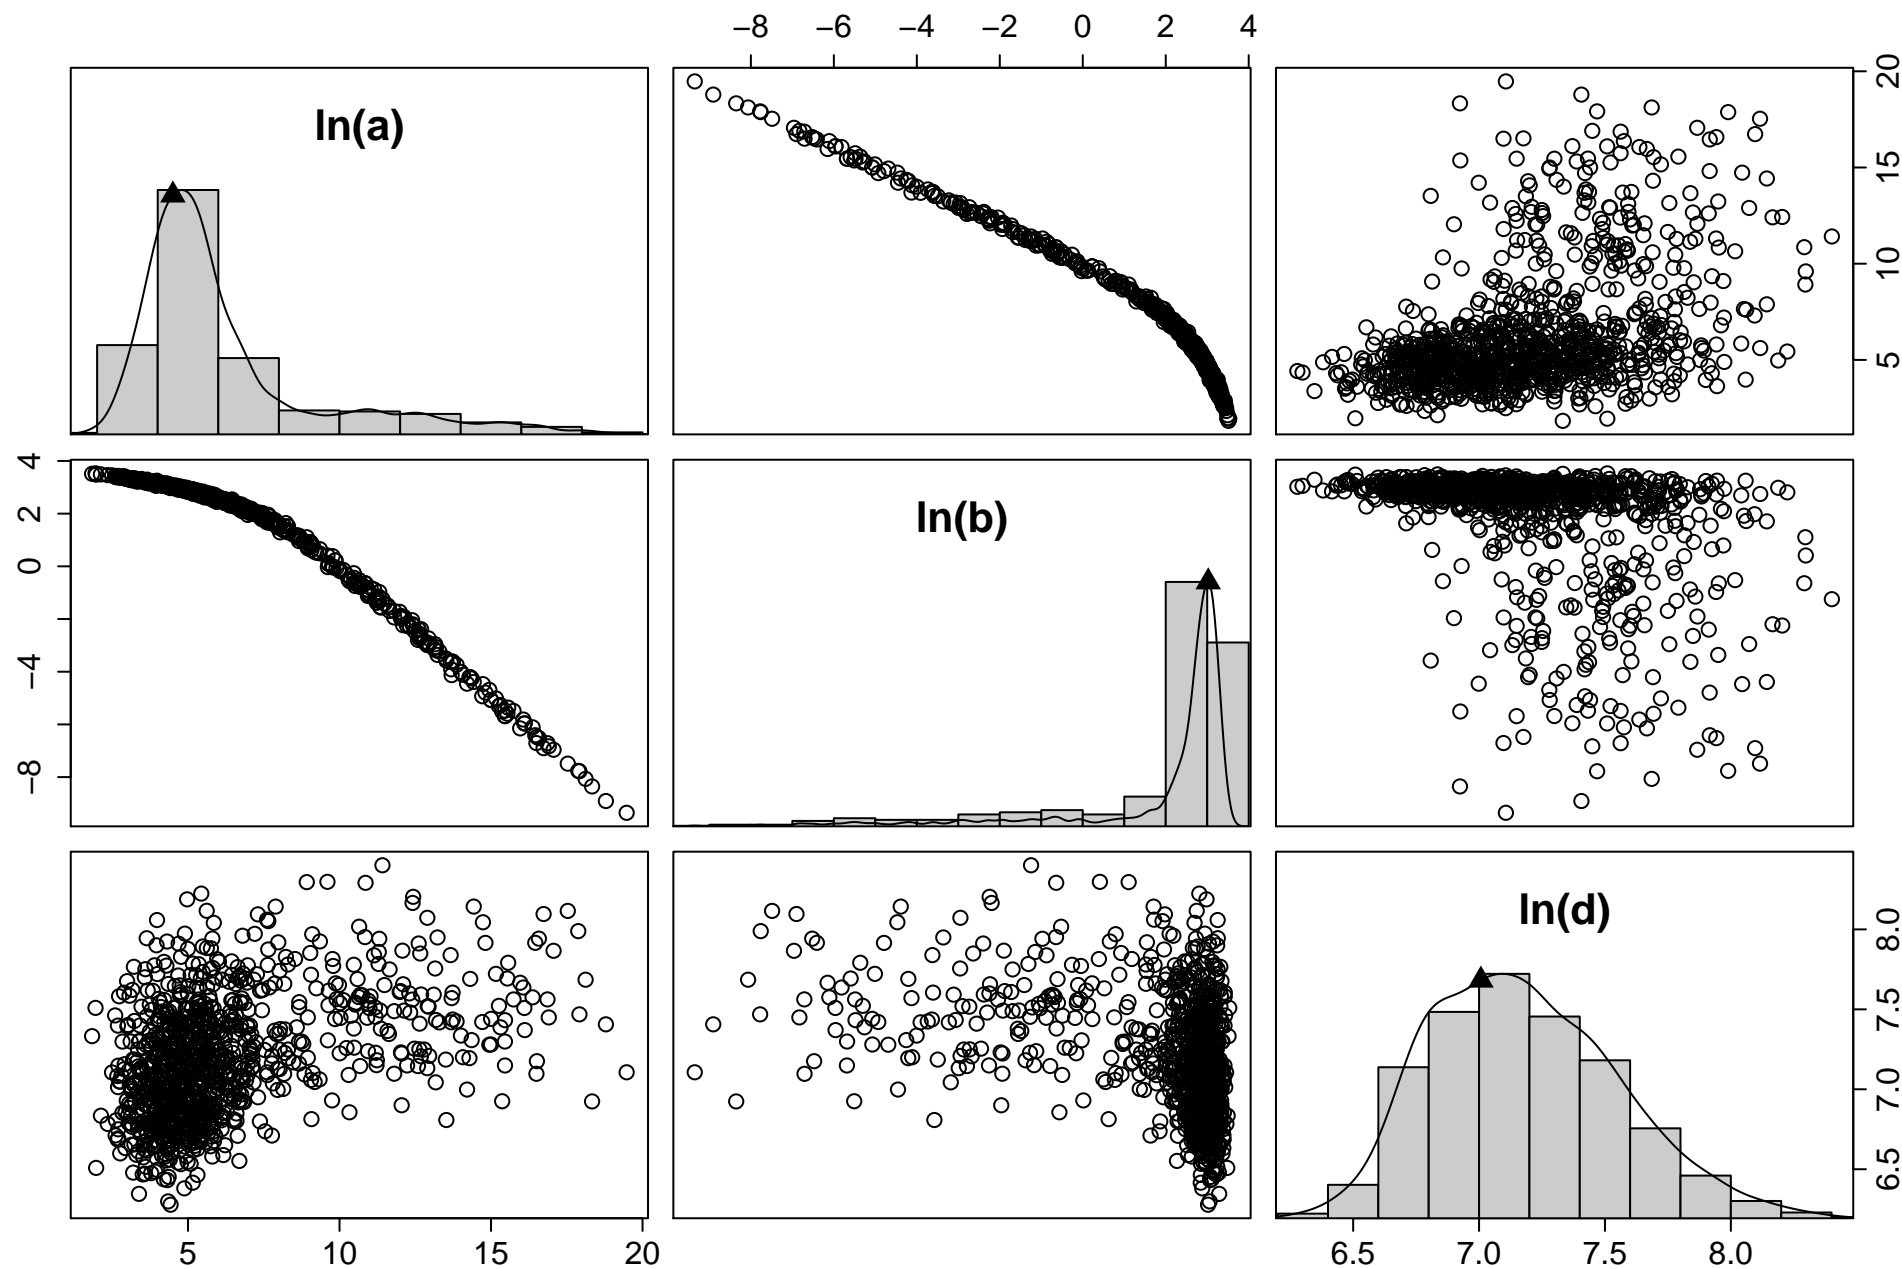

DR Figure 4. Continued: Model 14 (from DR Table 3); Taxon: Mya.

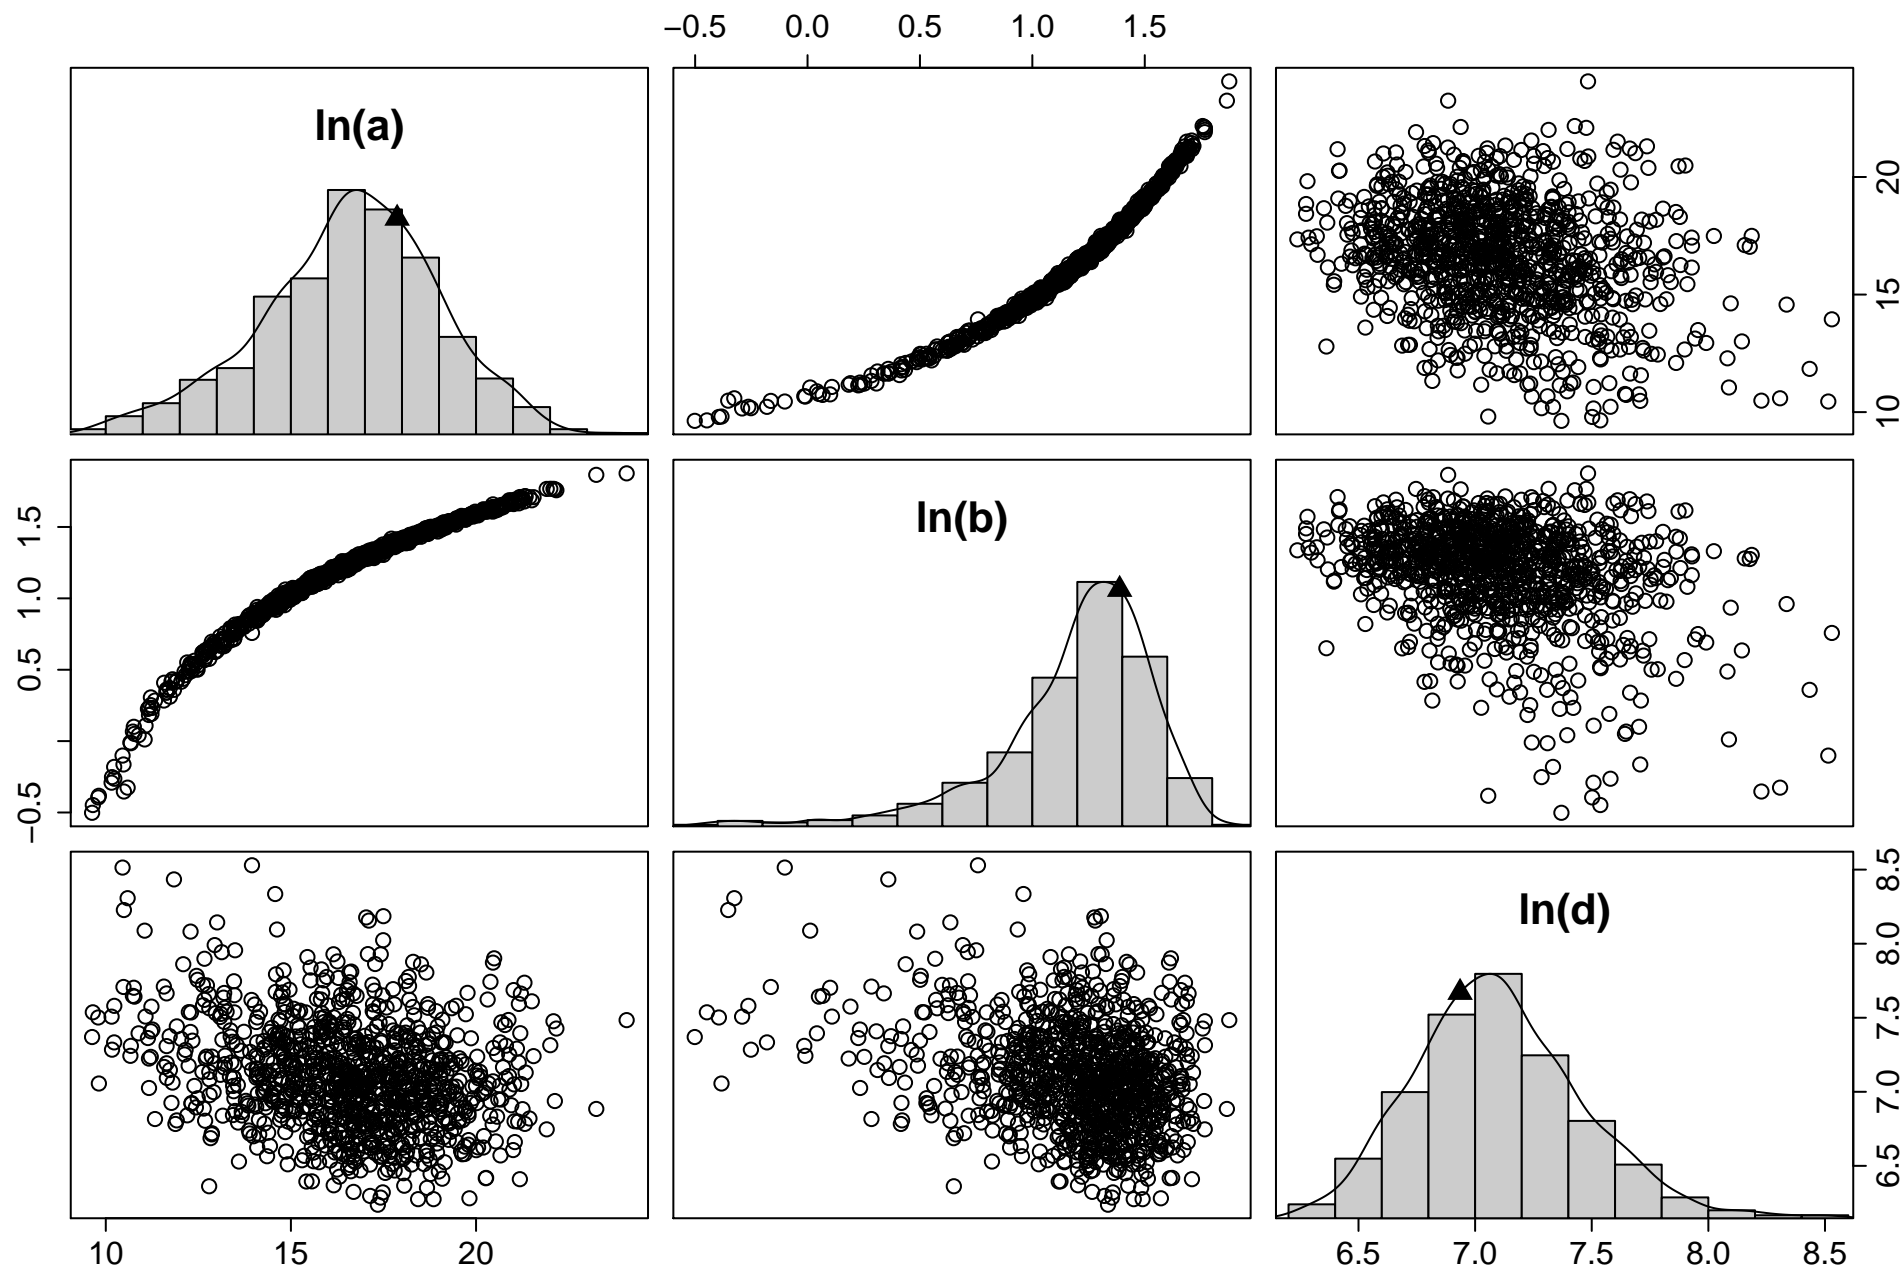

DR Figure 4. Continued: Model 15 (from DR Table 3); Taxon: Mya.

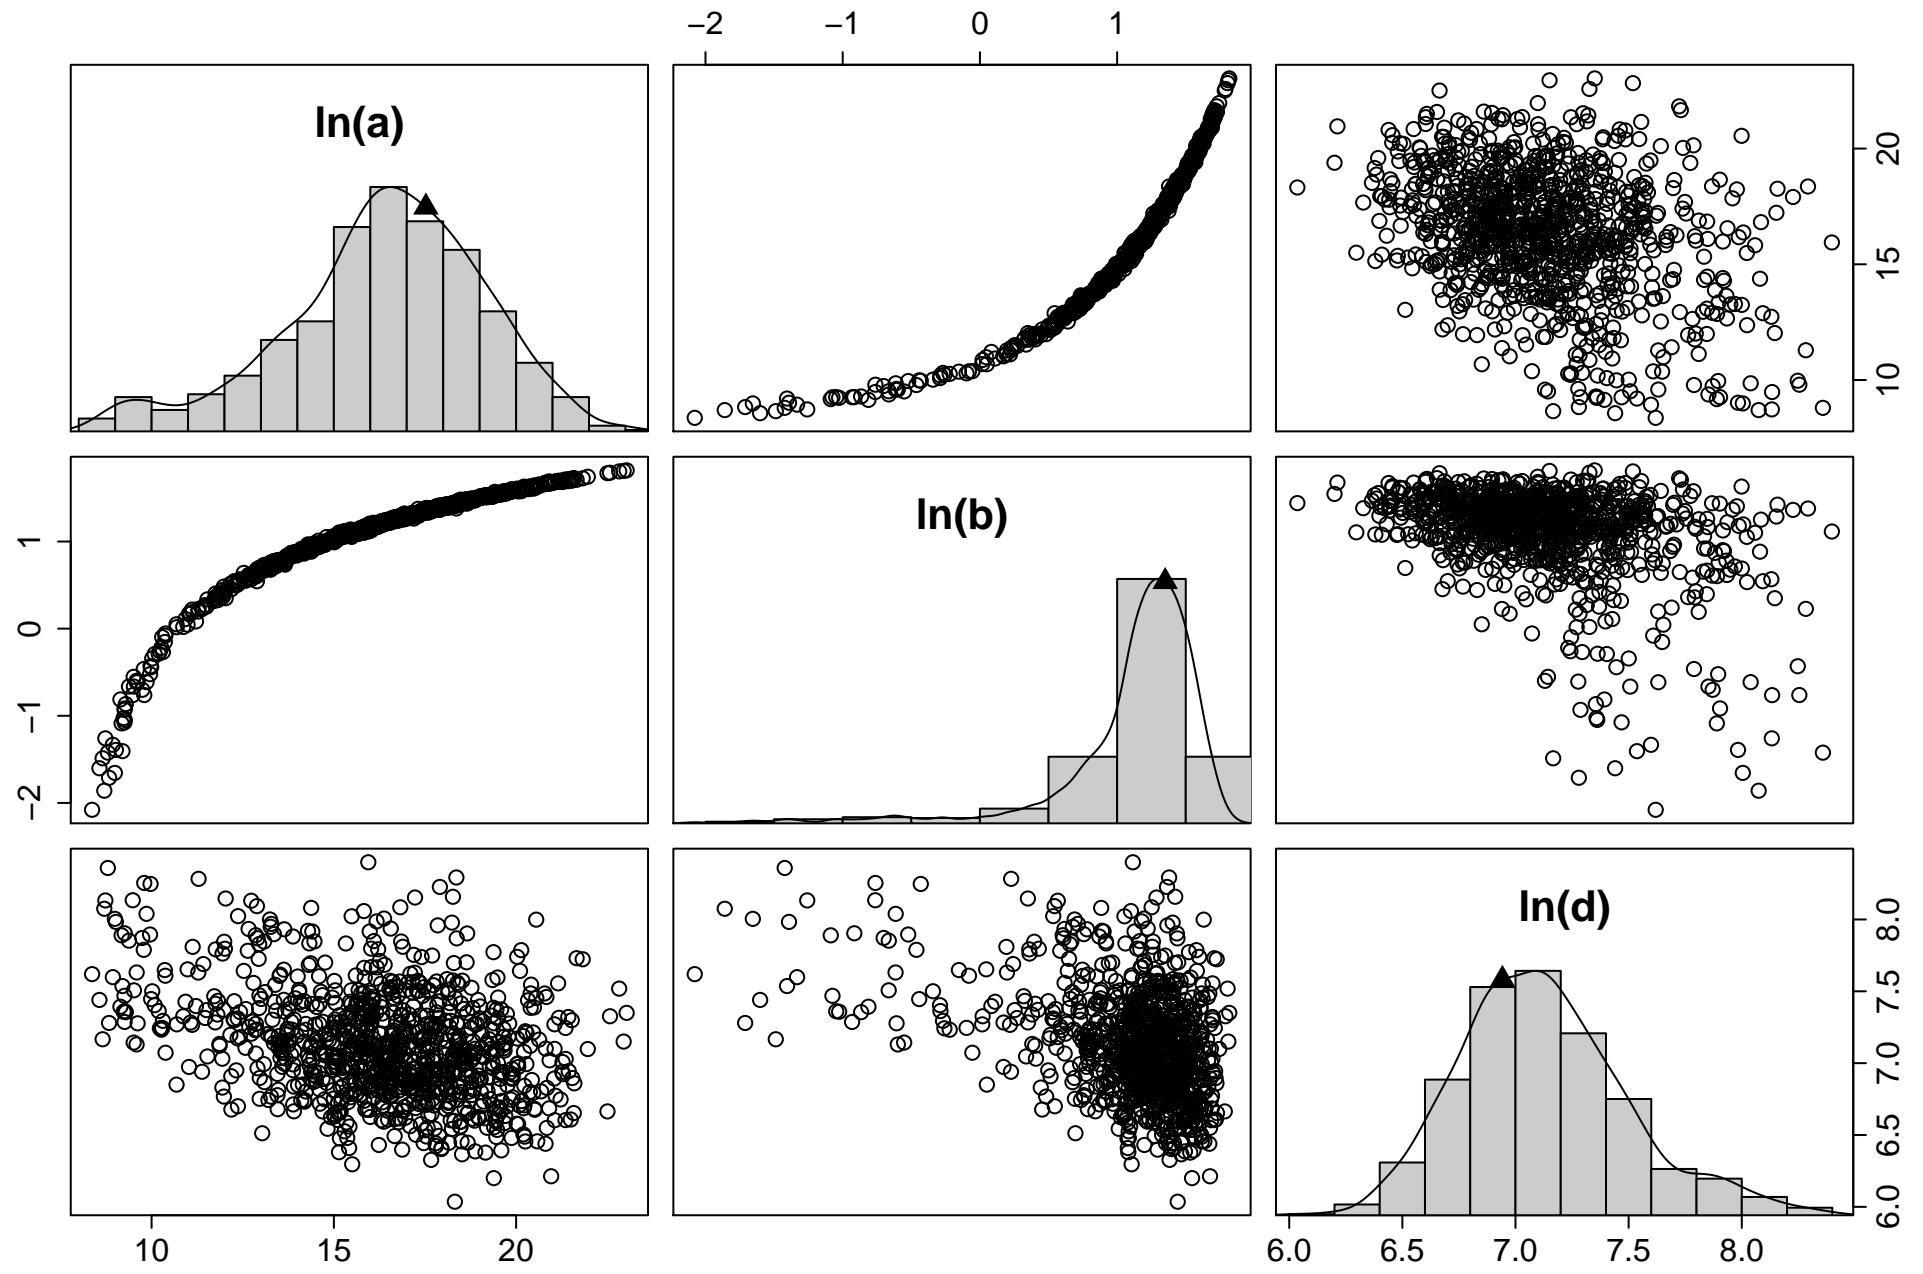

DR Figure 4. Continued: Model 16 (from DR Table 3); Taxon: Mya.

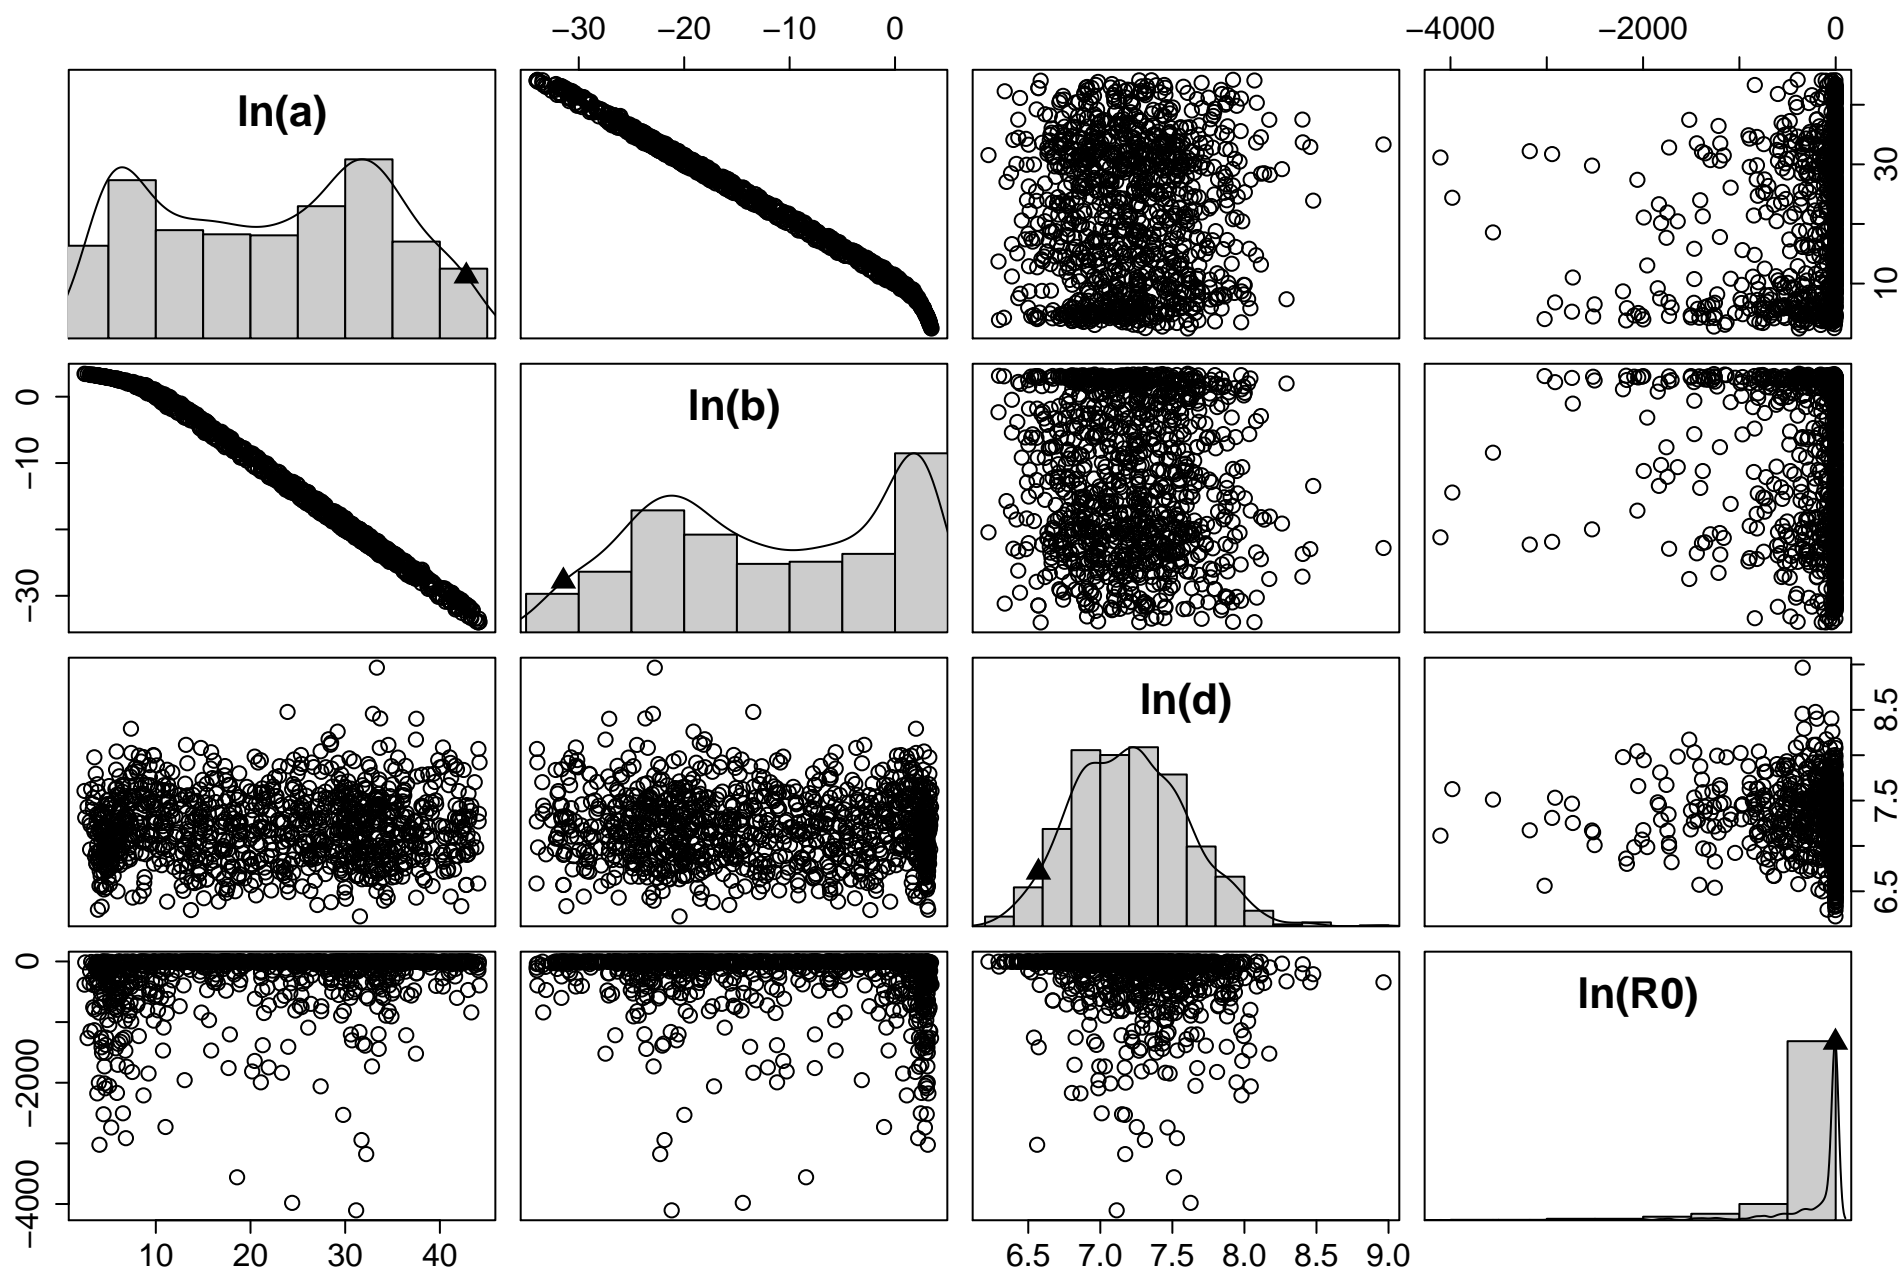



DR Figure 4. Continued: Model 17 (from DR Table 3); Taxon: Mya.

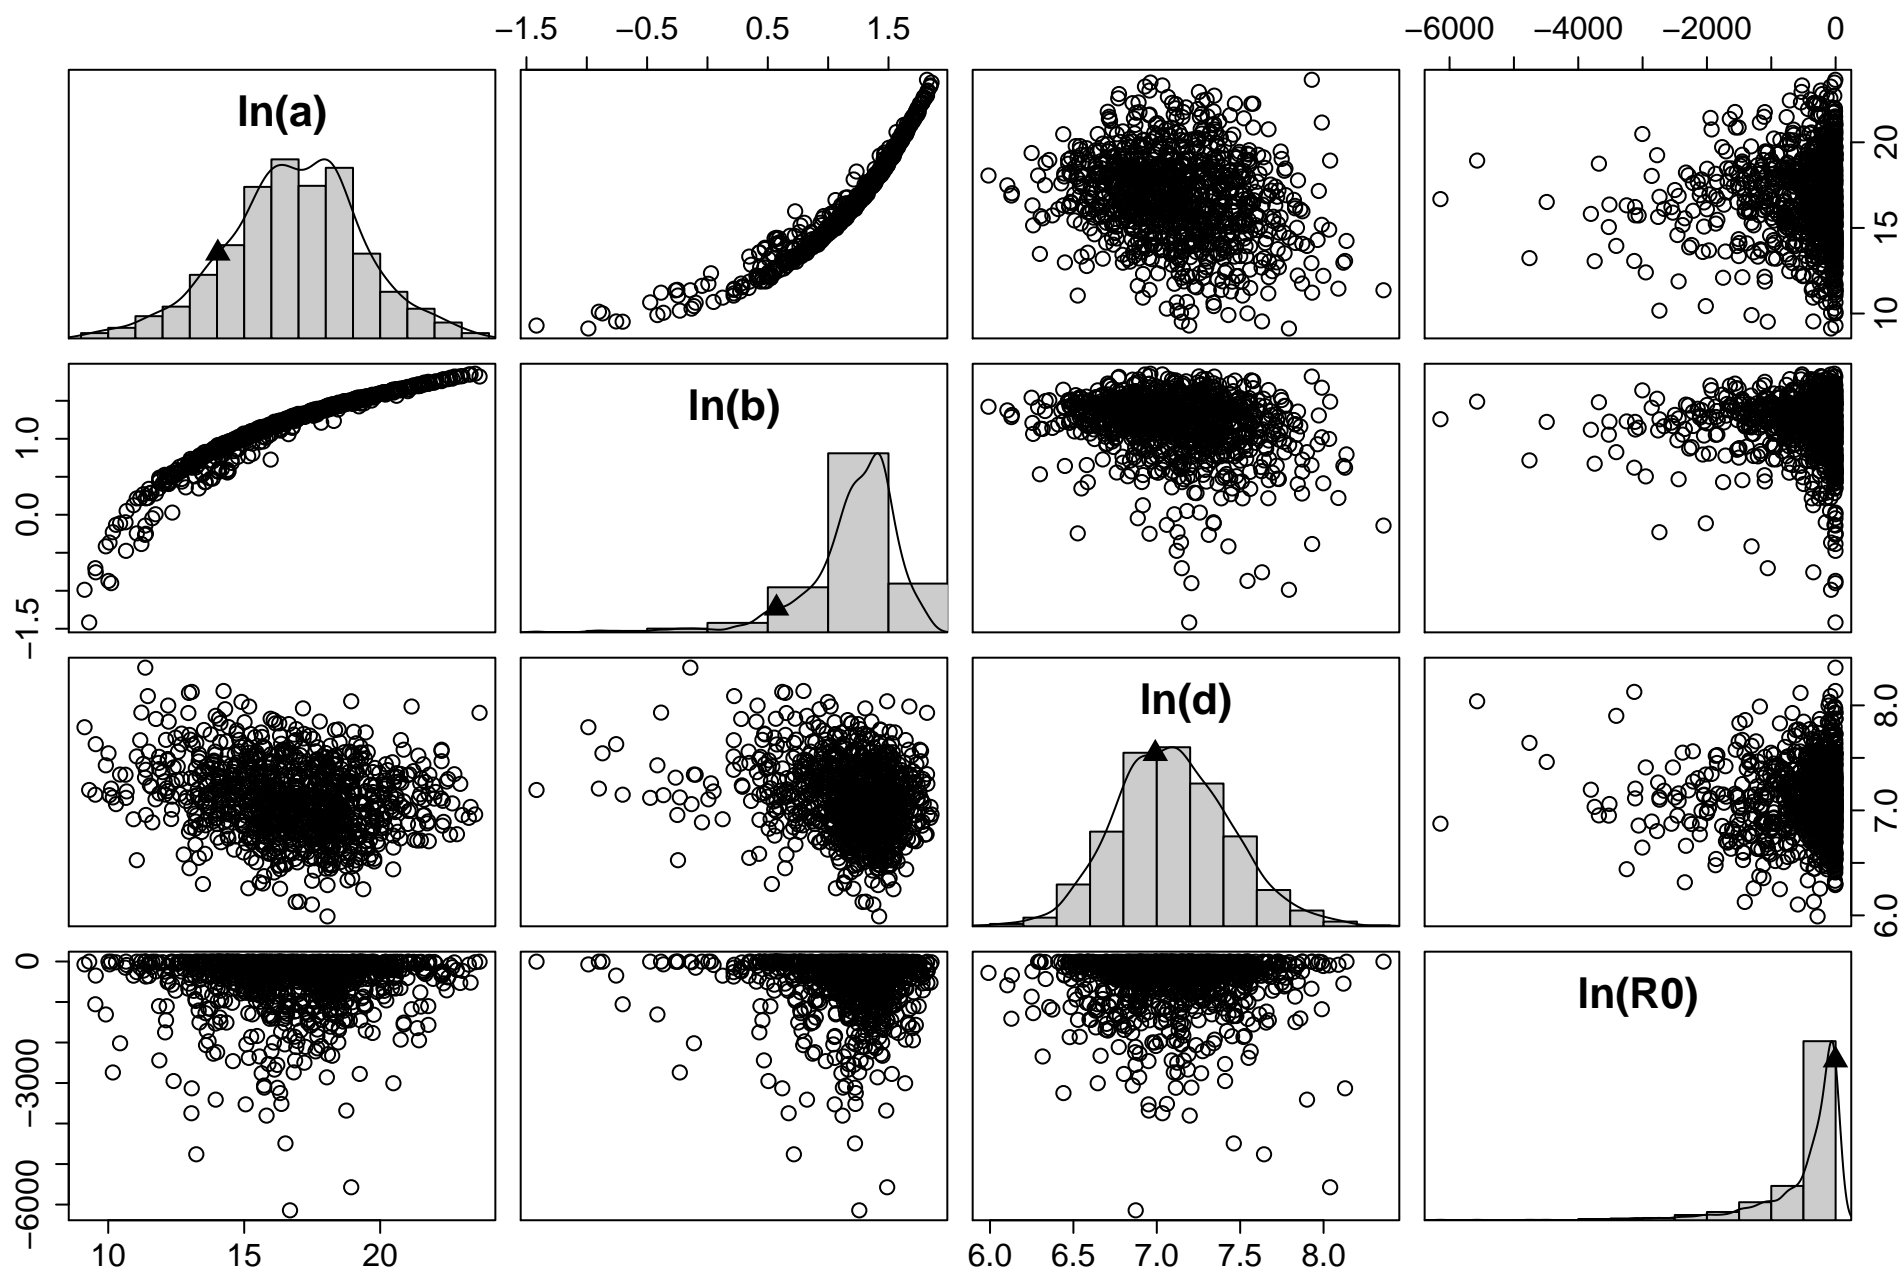

DR Figure 4. Continued: Model 18 (from DR Table 3); Taxon: Mya.

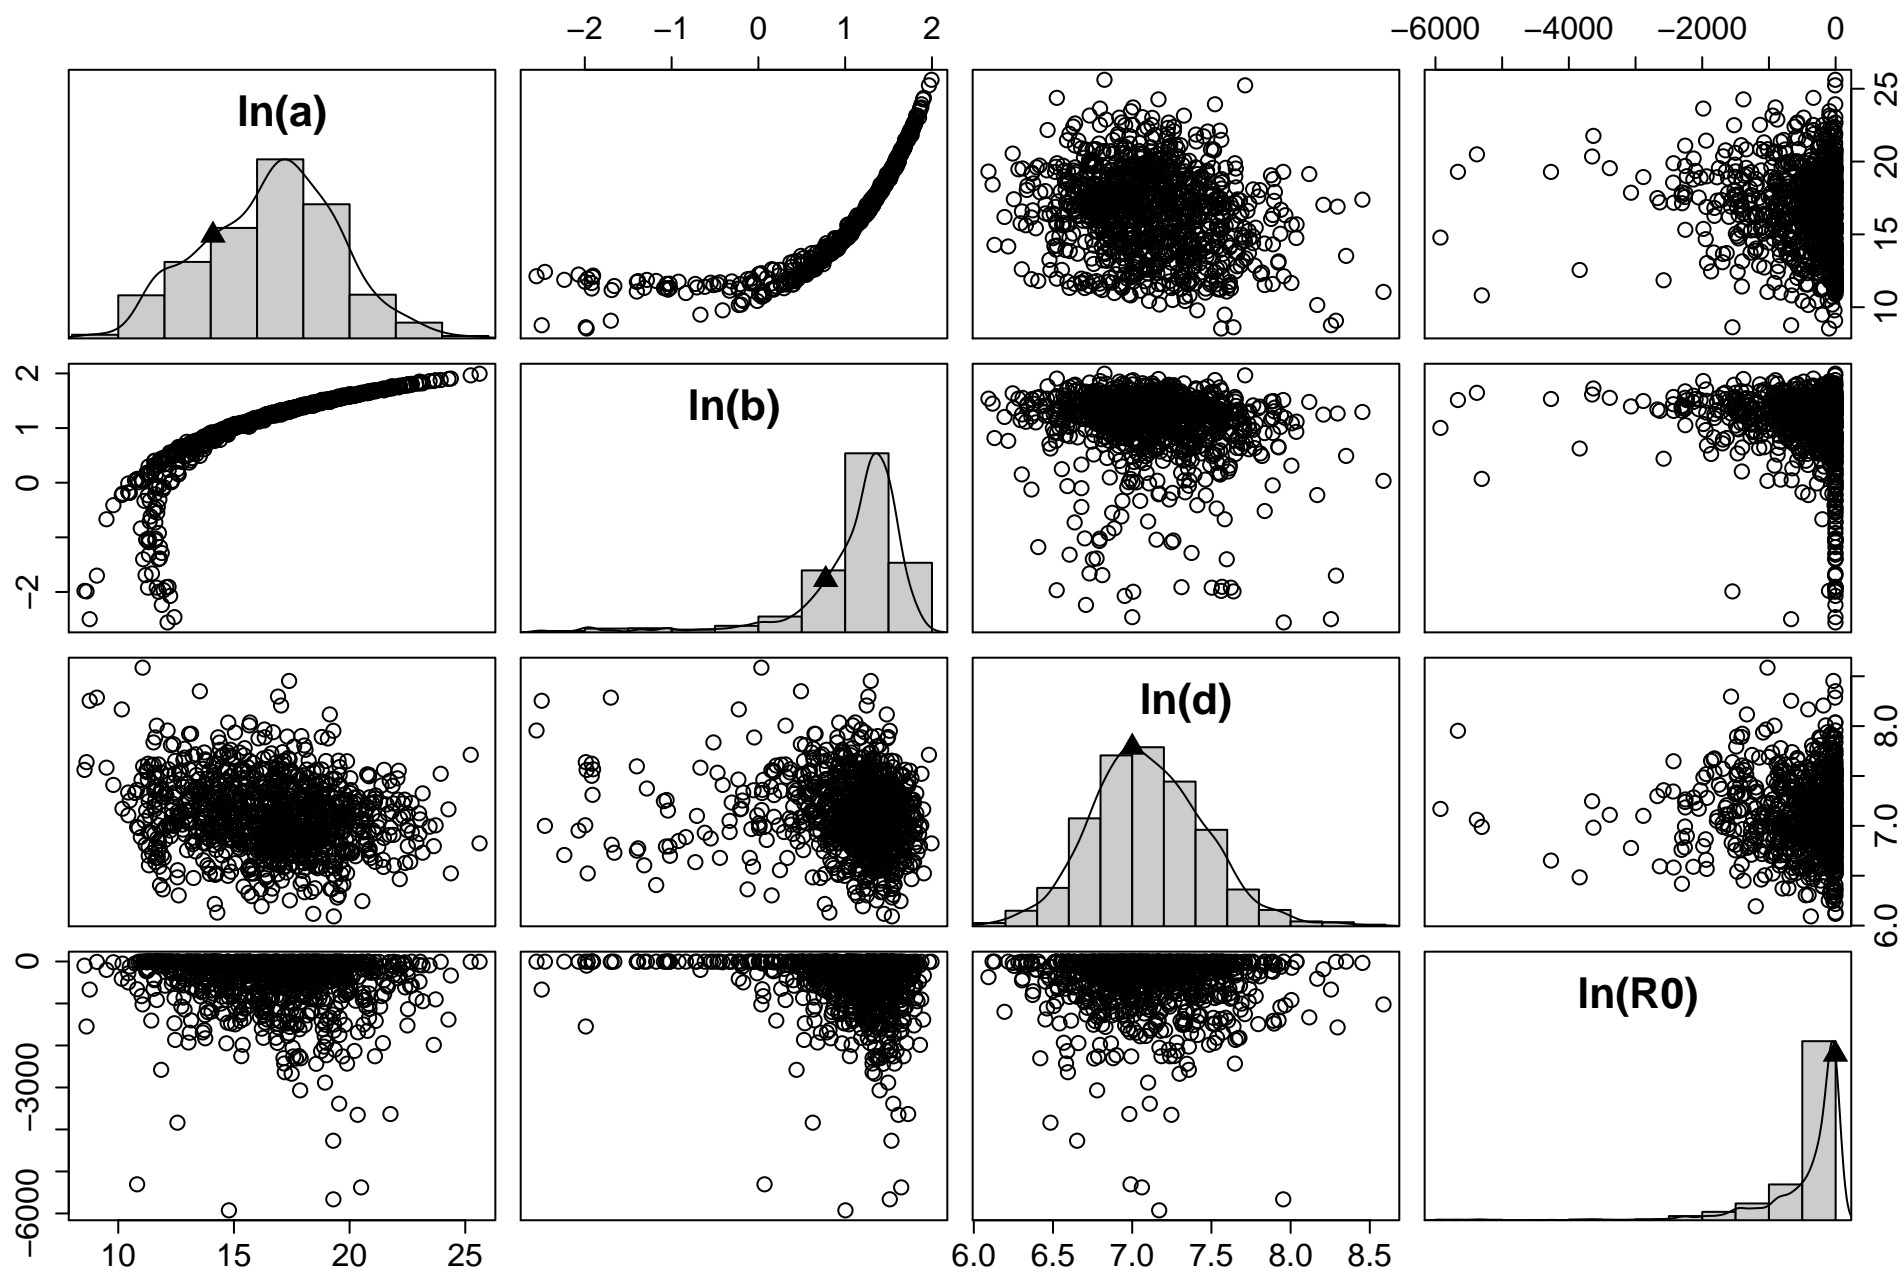

DR Figure 4. Continued: Model 19 (from DR Table 3); Taxon: Mya.

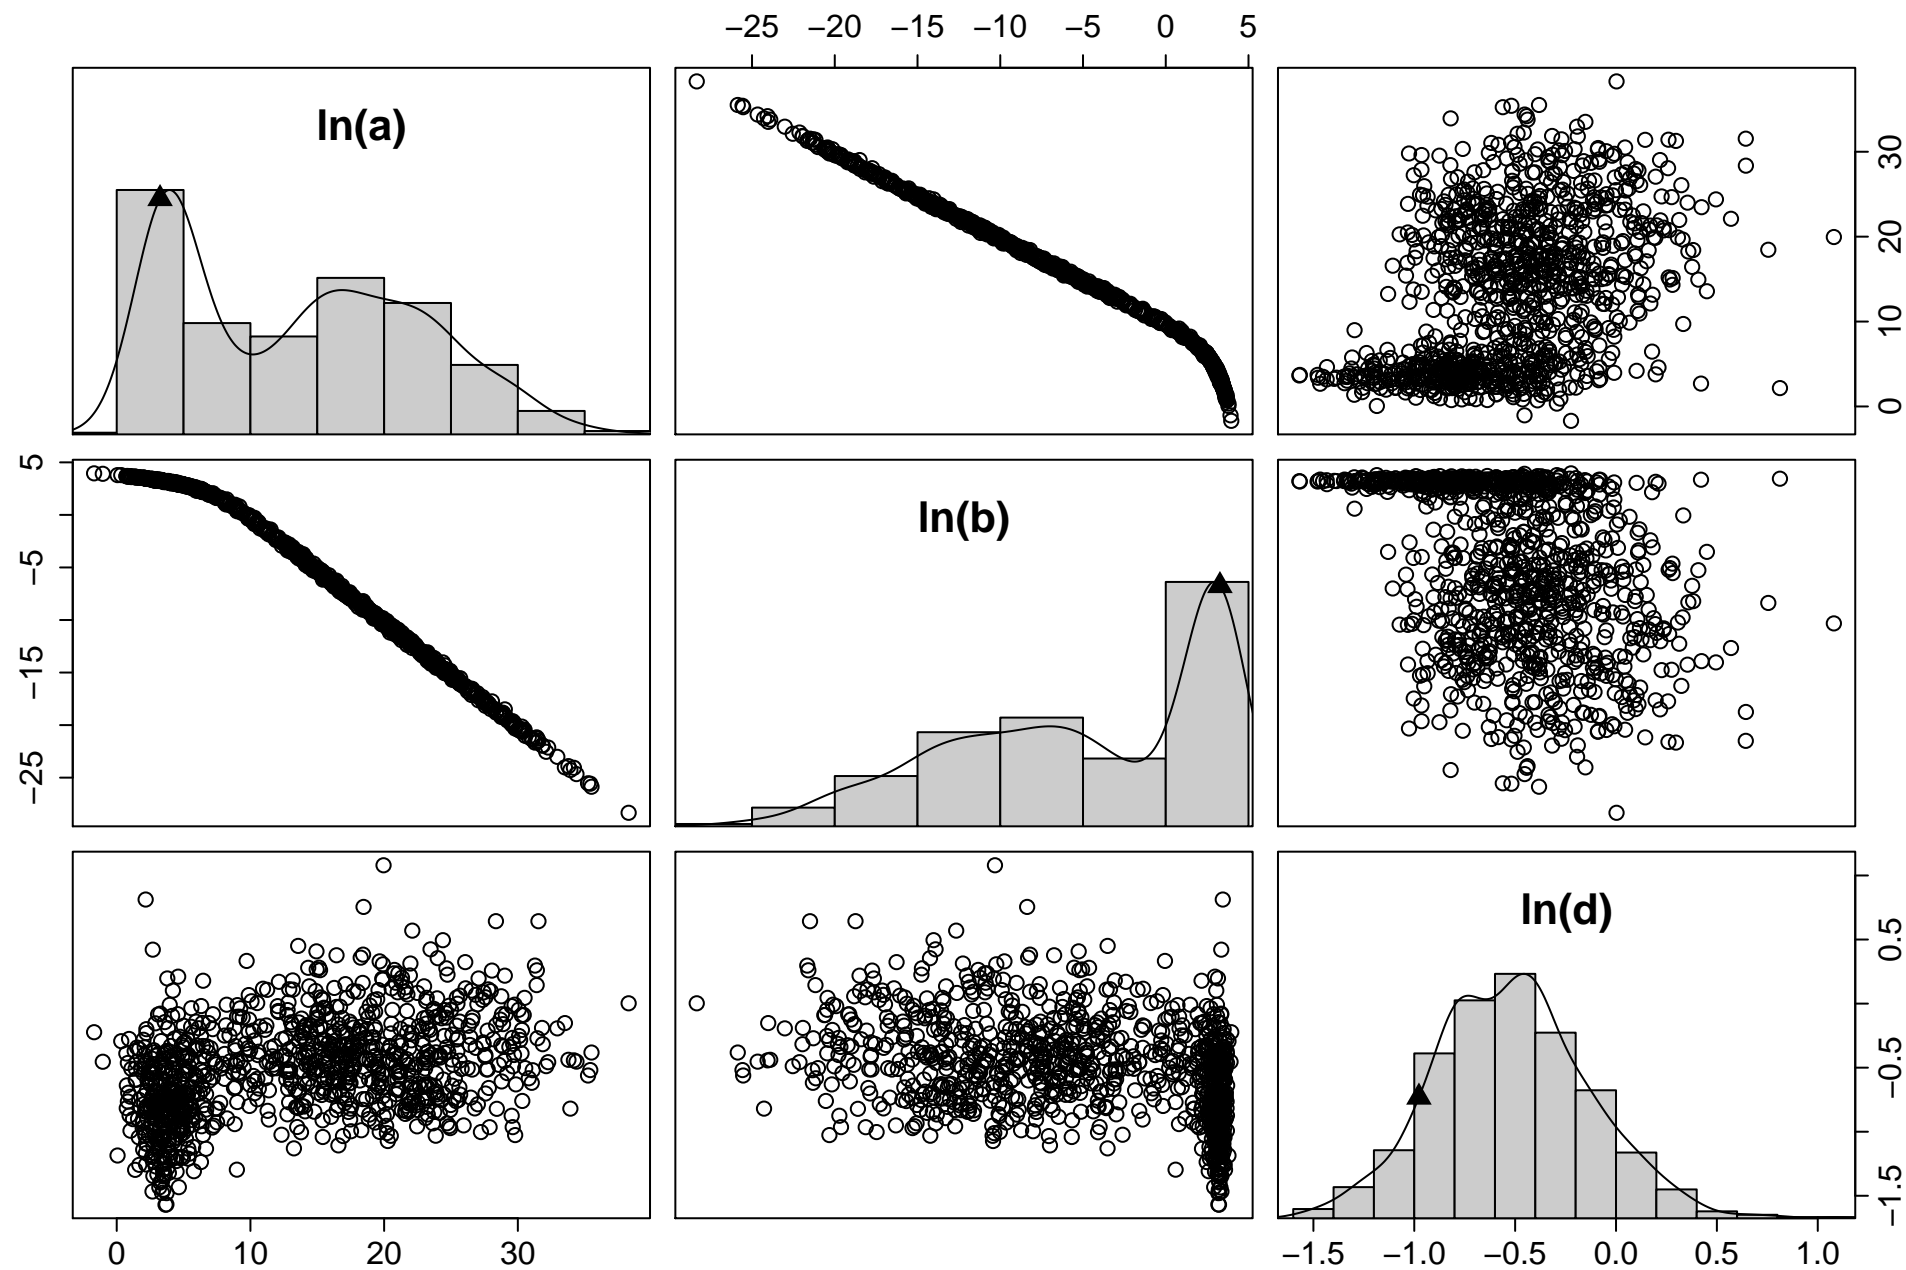

DR Figure 4. Continued: Model 20 (from DR Table 3); Taxon: Mya.

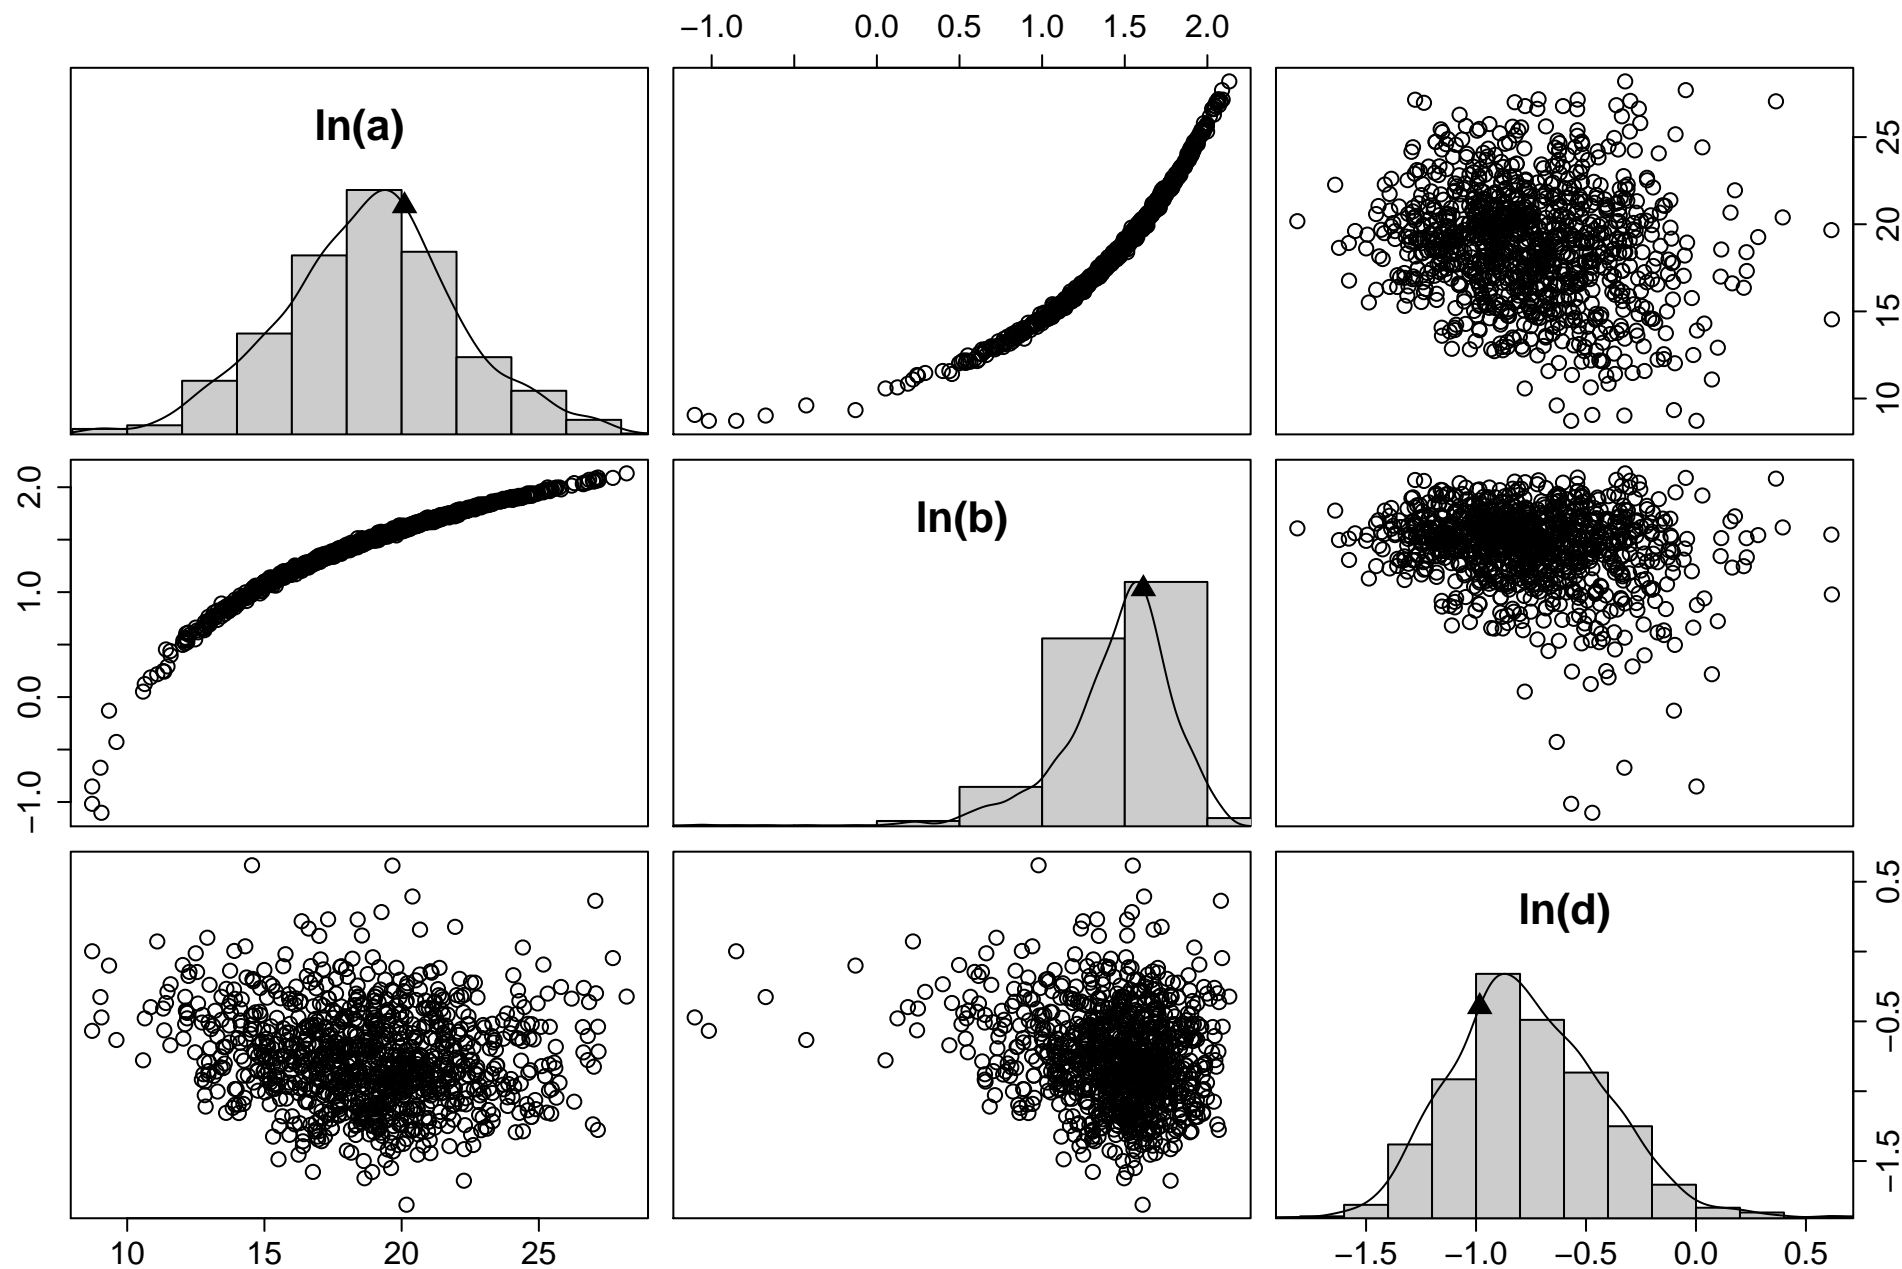

DR Figure 4. Continued: Model 21 (from DR Table 3); Taxon: Mya.

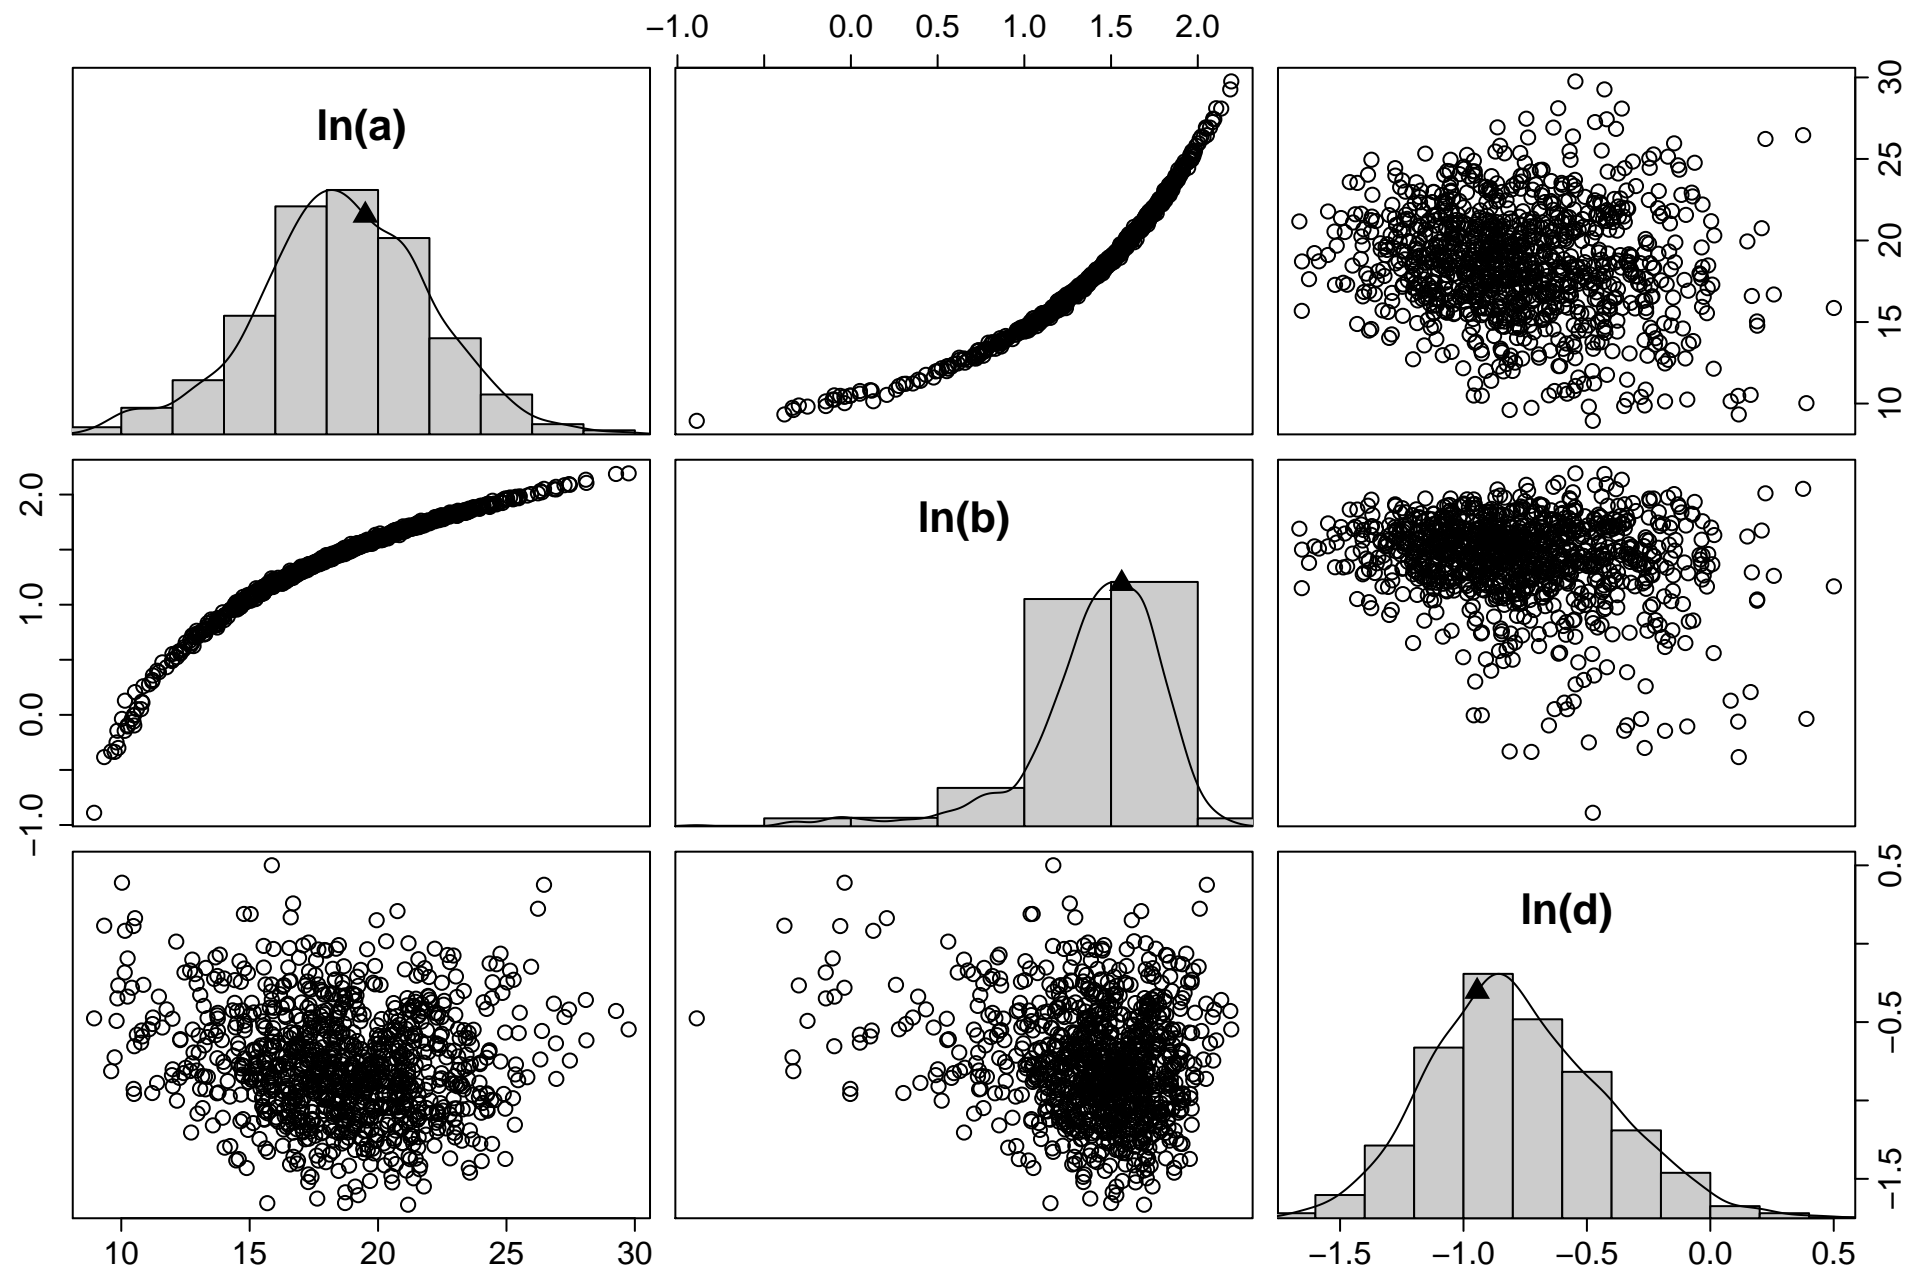

DR Figure 4. Continued: Model 22 (from DR Table 3); Taxon: Mya.

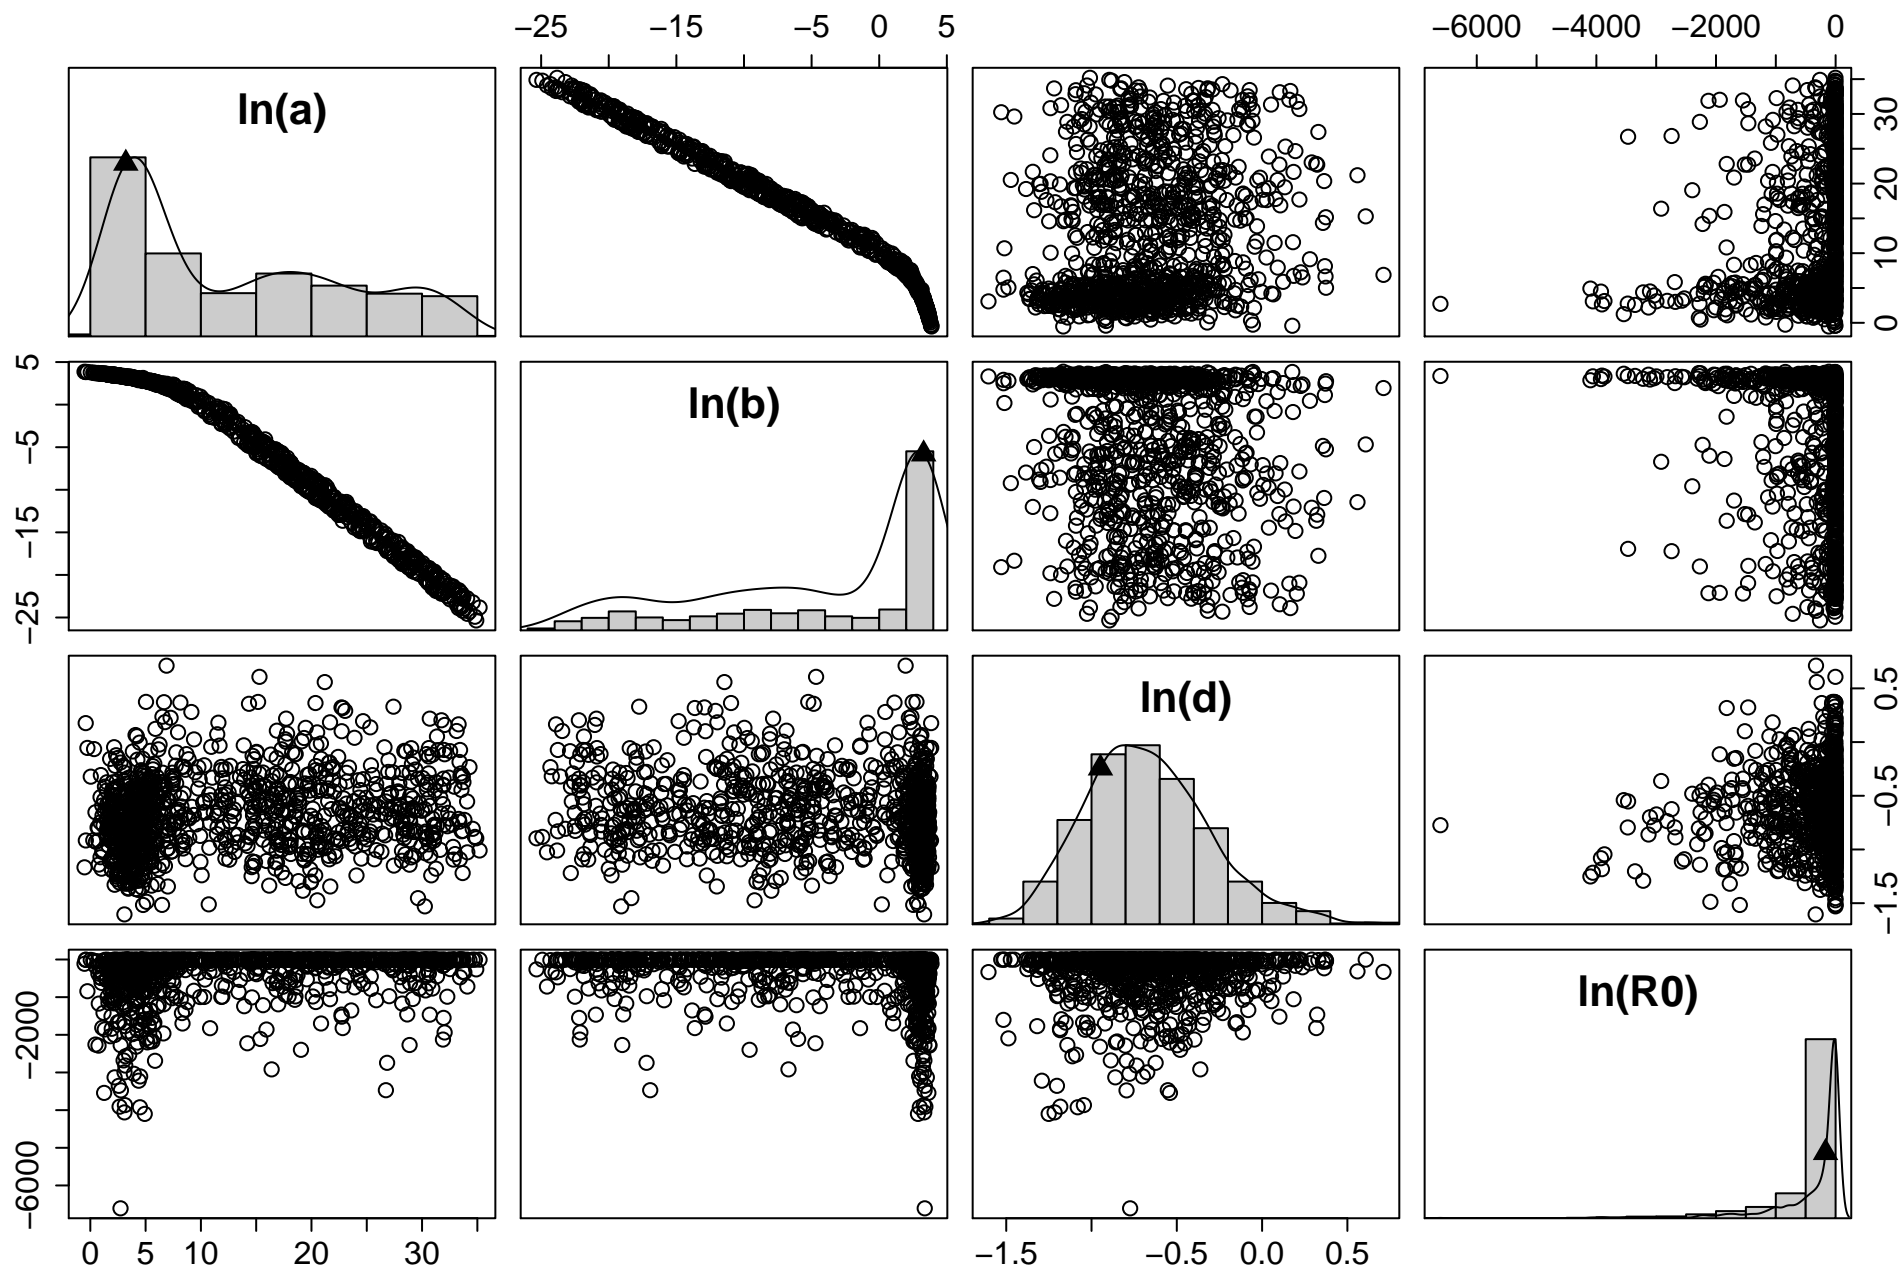

DR Figure 4. Continued: Model 23 (from DR Table 3); Taxon: Mya.

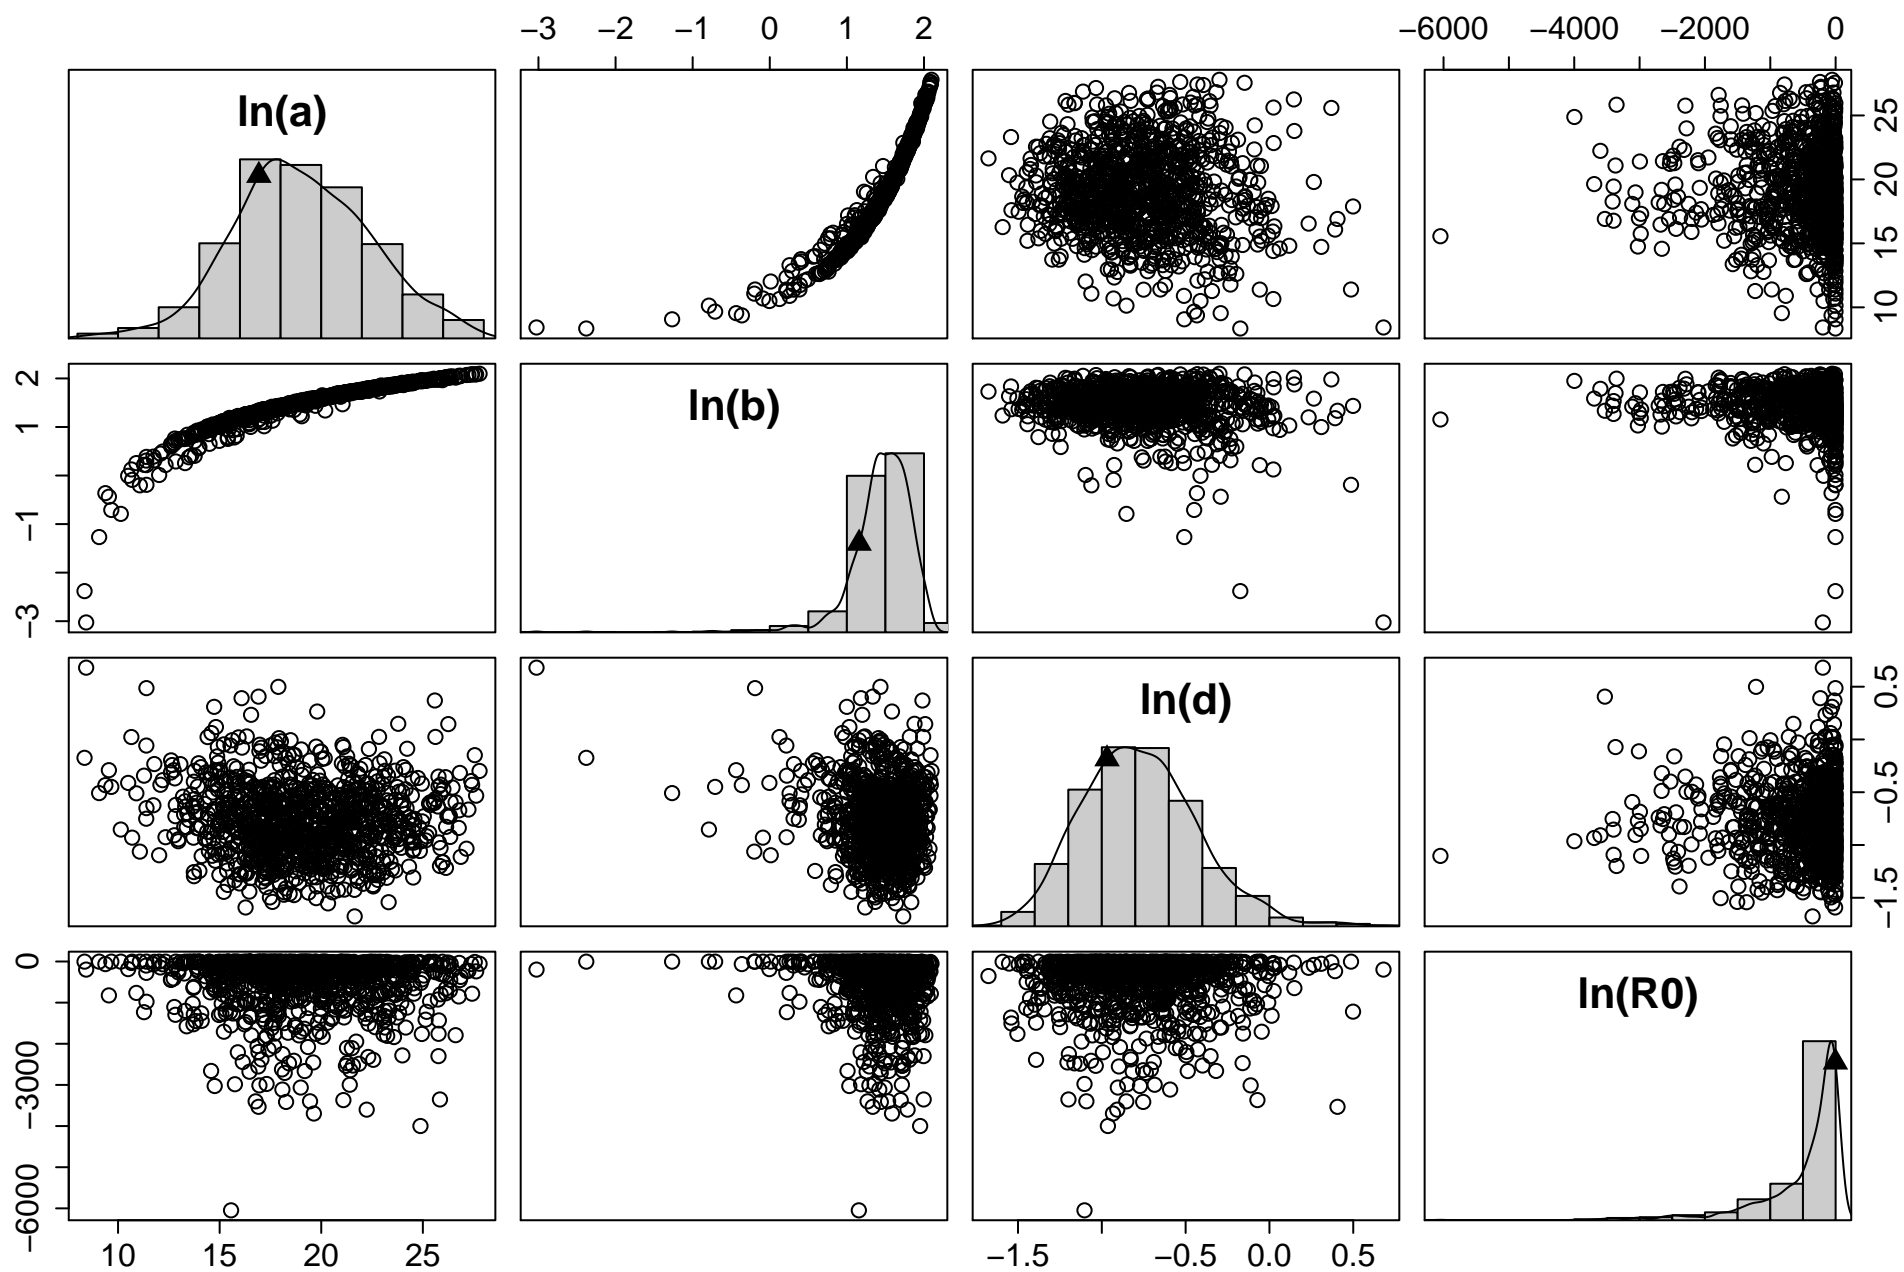

DR Figure 4. Continued: Model 24 (from DR Table 3); Taxon: Mya.

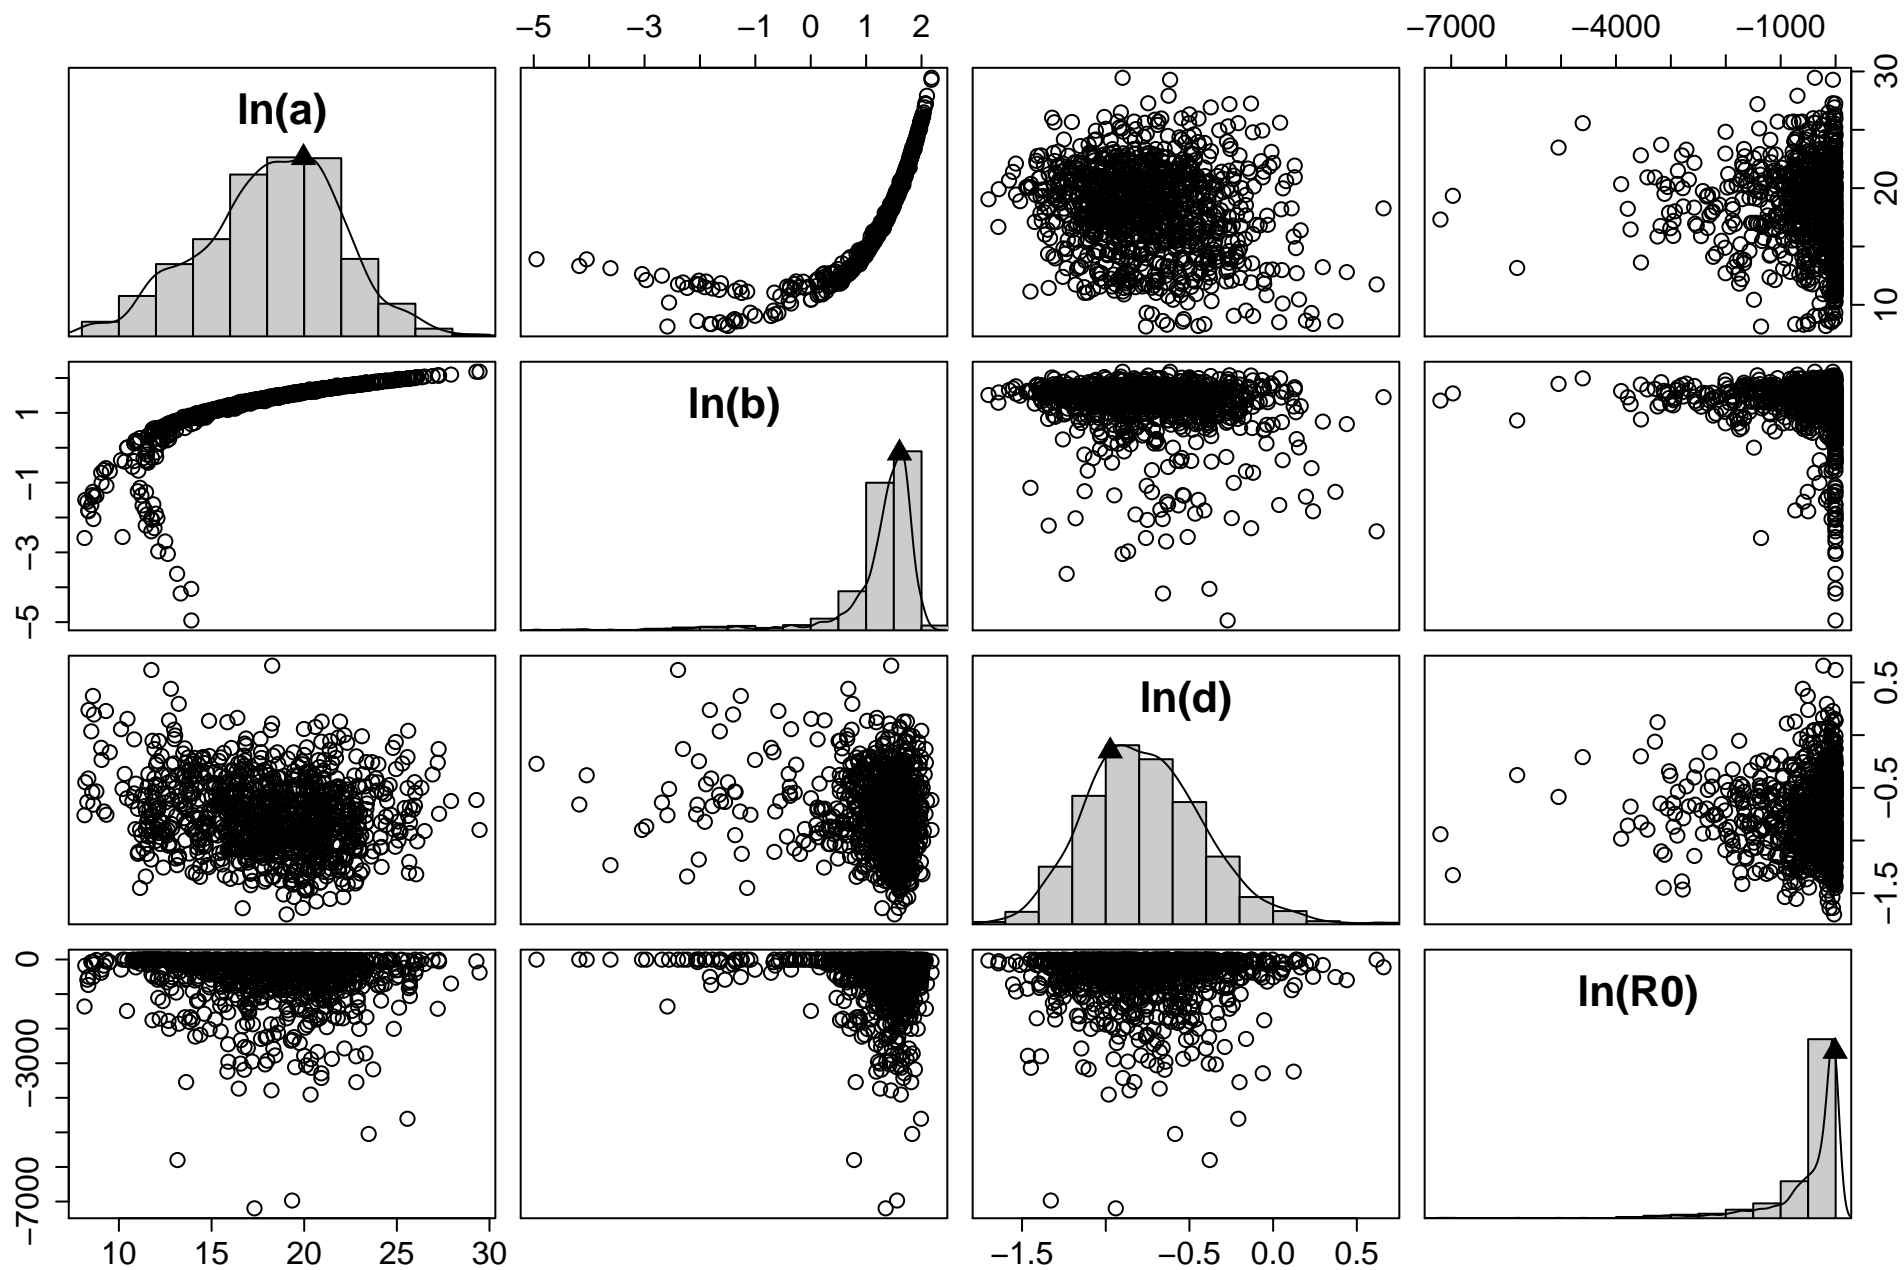



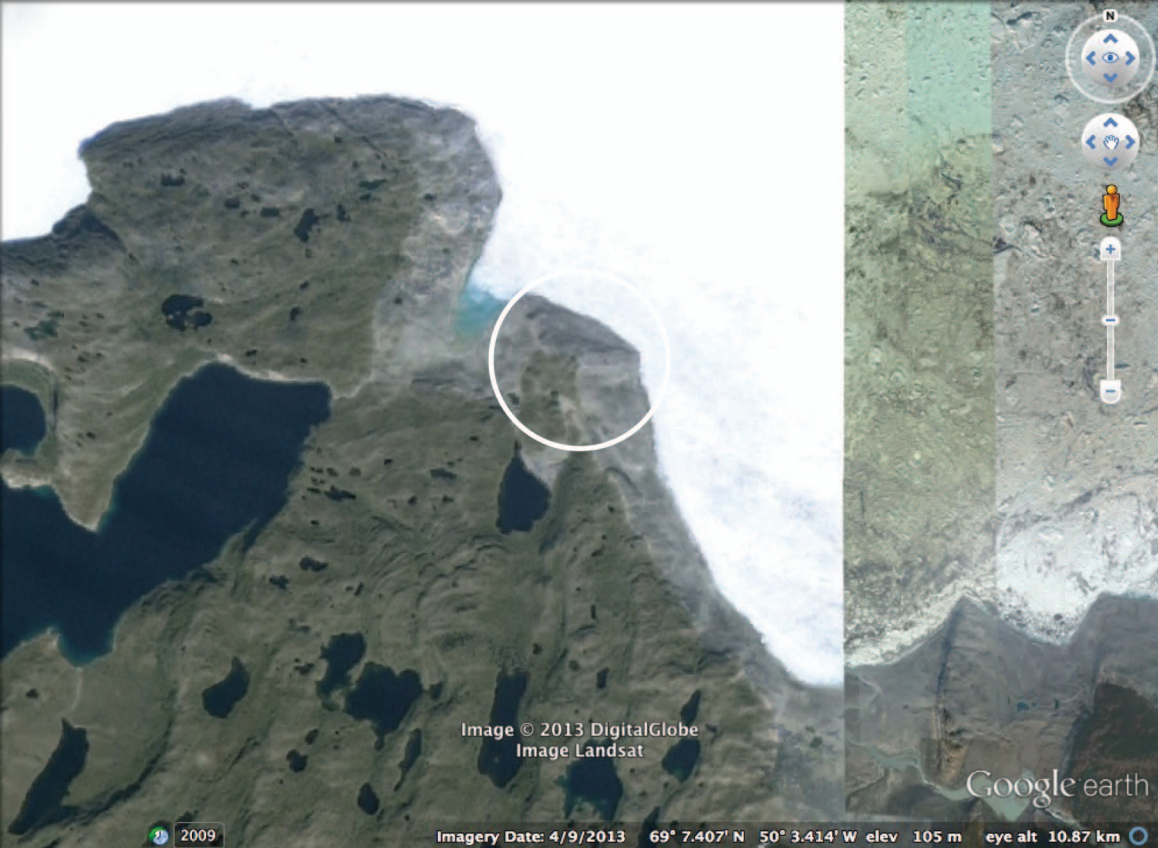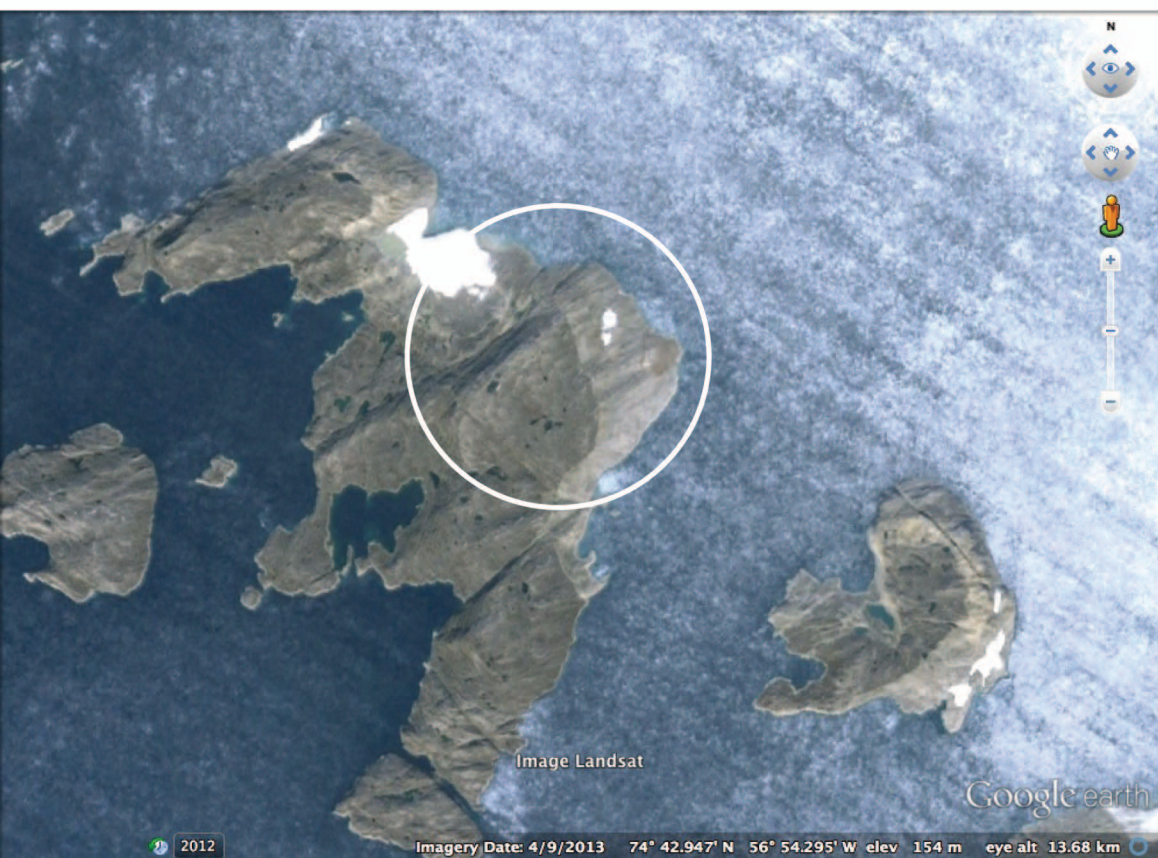

Figure DR5. Google Earth maps of moraine sampling locations. Top: 09GRO-Shells-3; Bottom: 11WBS.



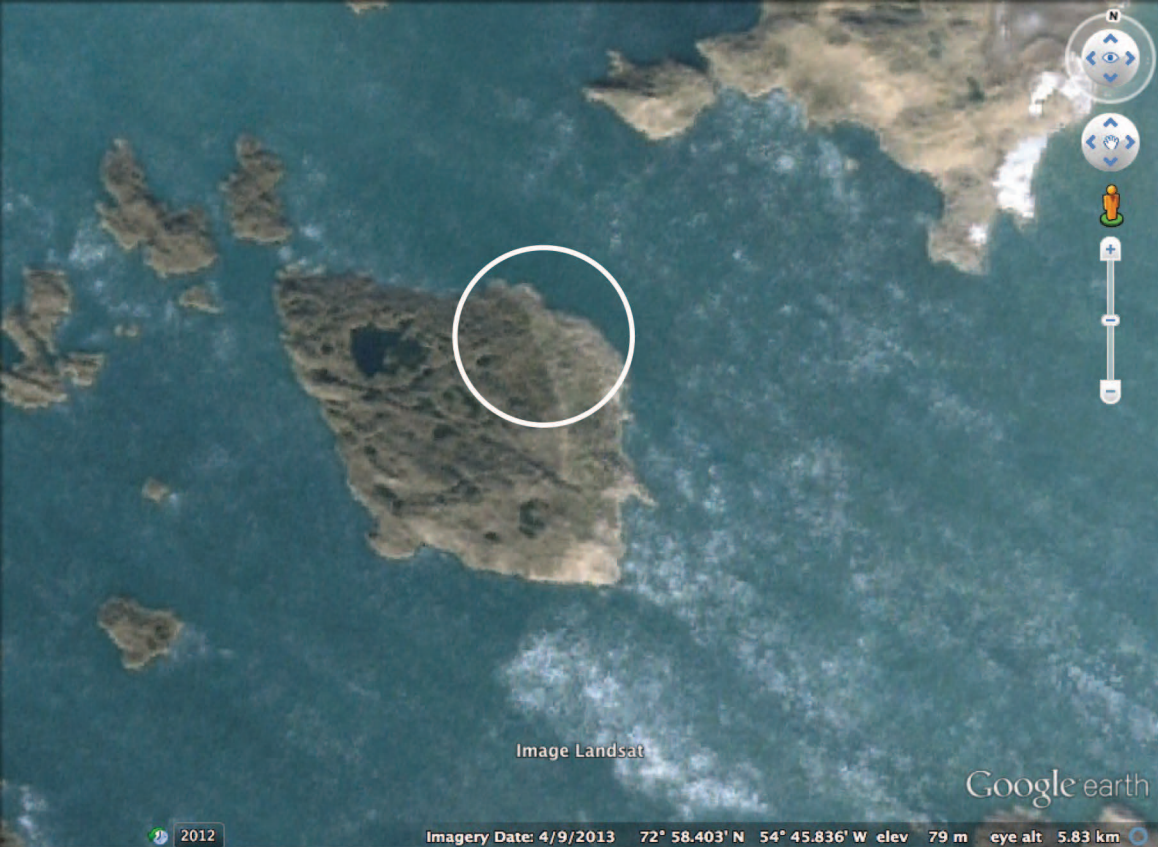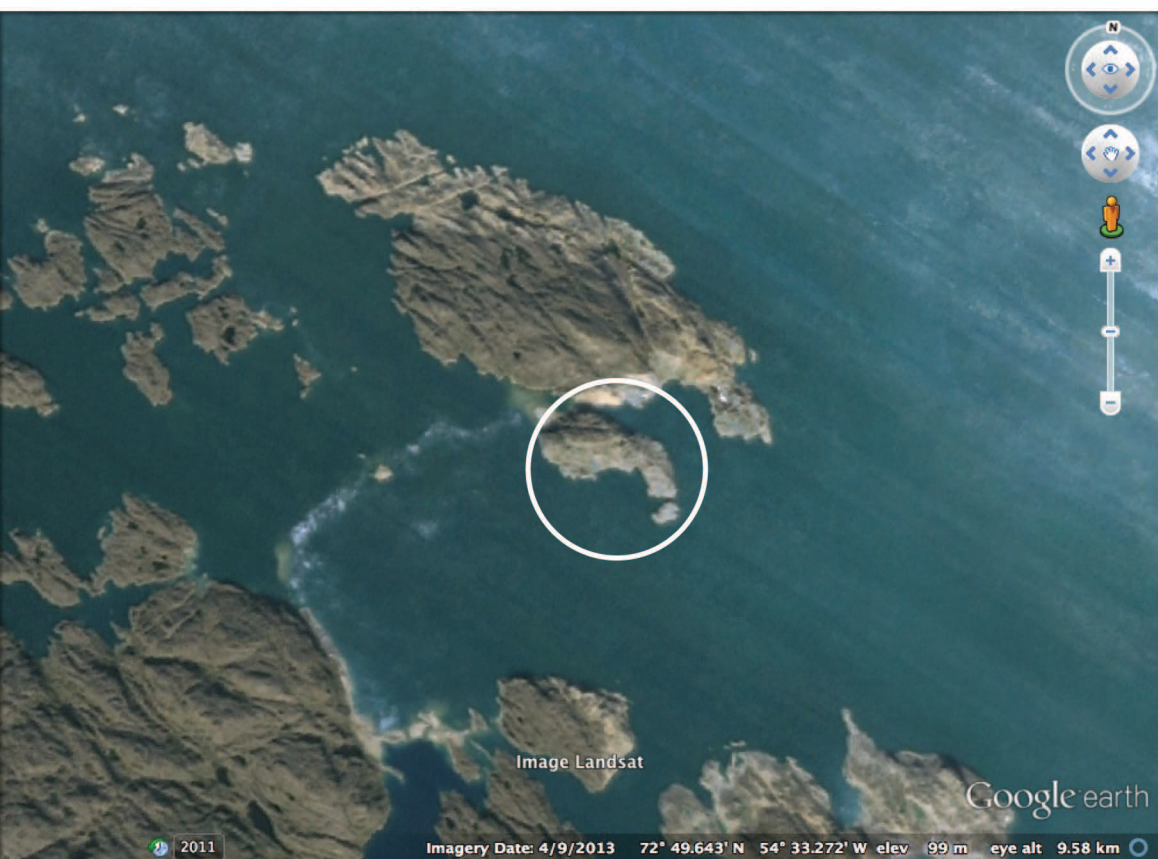

Figure DR6. Google Earth maps of moraine sampling locations. Top: 11GRO-9; Bottom: 11GRO-1
